# Supplementary material for: Typing tumors using pathways selected by somatic evolution
Source: Nat Commun. 2018 Oct 8;9:4159. doi: 10.1038/s41467-018-06464-y (PMC6175900; doi:10.1038/s41467-018-06464-y)
Supplement: Supplementary file 4 — Supplementary Data 1 [file 41467_2018_6464_MOESM4_ESM.xlsx]

## Sheet: HNSC Subnetwork for 2 subtypes
Subnetwork Name	P-value of differentially propagated score	P-value of differentially mutated score	# of ME edges	P-value of patient survival in TCGA	P-value of patient survival in MSK-IMPACT	P-value of difference of GDSC drug response
HNSC_S21	0.00e+00	0.00e+00	12	0.001090	0.425000	CETUXIMAB	0.037118
Adjacent matrix of HNSC_S21
NOTCH1	CDK8
NOTCH1	CNTN1
NOTCH1	CRB1
NOTCH1	HTT
POLE	NOTCH1
SMARCA4	NOTCH1
HNSC cancer gene of HNSC_S21
NOTCH1
SMARCA4

## Sheet: HNSC Subnetwork for 3 subtypes
Subnetwork Name	P-value of differentially propagated score	P-value of differentially mutated score	# of ME edges	P-value of patient survival in TCGA	P-value of patient survival in MSK-IMPACT	P-value of difference of GDSC drug response
HNSC_S31	9.91e-01	3.86e-07	12	0.001090	0.425000	CETUXIMAB	0.037118
HNSC_S32	6.73e-13	7.15e-01	6	0.982000	0.000000
Adjacent matrix of HNSC_S31			Adjacent matrix of HNSC_S32
NOTCH1	CDK8		TP53	EEF1A1
NOTCH1	CNTN1		TP53	HRAS
NOTCH1	CRB1		TP53	HSP90AA1
NOTCH1	HTT
POLE	NOTCH1
SMARCA4	NOTCH1
HNSC cancer gene of HNSC_S31			HNSC cancer gene of HNSC_S32
NOTCH1			EEF1A1
SMARCA4			HRAS
			TP53

## Sheet: HNSC Subnetwork for 4 subtypes
Subnetwork Name	P-value of differentially propagated score	P-value of differentially mutated score	# of ME edges	P-value of patient survival in TCGA	P-value of patient survival in MSK-IMPACT	P-value of difference of GDSC drug response

## Sheet: HNSC Subnetwork for 5 subtypes
Subnetwork Name	P-value of differentially propagated score	P-value of differentially mutated score	# of ME edges	P-value of patient survival in TCGA	P-value of patient survival in MSK-IMPACT	P-value of difference of GDSC drug response
HNSC_S51	6.76e-01	5.97e-01	26	0.160000	0.000000	CISPLATIN	0.039842
						BLEOMYCIN (50 UM)	0.057480
HNSC_S52	1.00e+00	1.00e+00	12	0.985000	0.000243	CETUXIMAB	0.078362
						CISPLATIN	0.091463
HNSC_S53	4.10e-03	1.00e+00	6	0.874000	0.000000
HNSC_S54	0.00e+00	0.00e+00	12	0.001090	0.425000	CETUXIMAB	0.037118
HNSC_S55	0.00e+00	7.74e-10	8	0.012600	0.985000	BLEOMYCIN	0.073357
HNSC_S56	0.00e+00	8.13e-14	2	0.907000	0.000243	CETUXIMAB	0.032358
Adjacent matrix of HNSC_S51			Adjacent matrix of HNSC_S52			Adjacent matrix of HNSC_S53			Adjacent matrix of HNSC_S54			Adjacent matrix of HNSC_S55			Adjacent matrix of HNSC_S56
TP53	CREBBP		HSPA8	CDKN2A		TP53	NCOA6		NOTCH1	CDK8		NOTCH1	CDK8		TUBGCP6	CDKN2A
TP53	EEF1A1		MCM10	CDKN2A		TP53	AGO1		NOTCH1	CNTN1		NOTCH1	CRB1
TP53	FLNA		WRN	CDKN2A		CASP8	TP53		NOTCH1	CRB1		NOTCH1	HTT
TP53	HRAS		ACTN4	CDKN2A					NOTCH1	HTT		SMARCA4	NOTCH1
TP53	HSP90AA1		CUL4B	CDKN2A					POLE	NOTCH1
TP53	NMT1		TUBGCP6	CDKN2A					SMARCA4	NOTCH1
TP53	CHD8
TP53	RB1
TP53	TRIM27
PRRC2A	TP53
MAP9	TP53
CCNE2	TP53
SAFB2	TP53
HNSC cancer gene of HNSC_S51			HNSC cancer gene of HNSC_S52			HNSC cancer gene of HNSC_S53			HNSC cancer gene of HNSC_S54			HNSC cancer gene of HNSC_S55			HNSC cancer gene of HNSC_S56
EEF1A1			CDKN2A			TP53			NOTCH1			NOTCH1			CDKN2A
HRAS			HSPA8			CASP8			SMARCA4			SMARCA4
RB1
TP53

## Sheet: HNSC Subnetwork for 6 subtypes
Subnetwork Name	P-value of differentially propagated score	P-value of differentially mutated score	# of ME edges	P-value of patient survival in TCGA	P-value of patient survival in MSK-IMPACT	P-value of difference of GDSC drug response
HNSC_S61	5.13e-01	3.62e-01	20	0.601000	0.000000	BLEOMYCIN (50 UM)	0.094495
HNSC_S62	1.70e-01	5.11e-01	2	0.386000	0.000146
HNSC_S63	7.17e-01	6.91e-01	2	0.131000	1.000000
HNSC_S64	1.00e+00	1.00e+00	12	0.001090	0.425000	CETUXIMAB	0.037118
HNSC_S65	0.00e+00	0.00e+00	8	0.012600	0.985000	BLEOMYCIN	0.073357
HNSC_S66	1.00e+00	1.00e+00	2	0.907000	0.000243	CETUXIMAB	0.032358
HNSC_S67	0.00e+00	4.14e-10	12	0.985000	0.000243	CETUXIMAB	0.078362
						CISPLATIN	0.091463
HNSC_S68	2.68e-01	7.73e-01	6	0.874000	0.000000
Adjacent matrix of HNSC_S61			Adjacent matrix of HNSC_S62			Adjacent matrix of HNSC_S63			Adjacent matrix of HNSC_S64			Adjacent matrix of HNSC_S65			Adjacent matrix of HNSC_S66			Adjacent matrix of HNSC_S67			Adjacent matrix of HNSC_S68
TP53	CREBBP		PIK3CA	EGFR		DST	MYH9		NOTCH1	CDK8		NOTCH1	CDK8		TUBGCP6	CDKN2A		HSPA8	CDKN2A		TP53	NCOA6
TP53	EEF1A1								NOTCH1	CNTN1		NOTCH1	CRB1					MCM10	CDKN2A		TP53	AGO1
TP53	FLNA								NOTCH1	CRB1		NOTCH1	HTT					WRN	CDKN2A		CASP8	TP53
TP53	GIGYF2								NOTCH1	HTT		SMARCA4	NOTCH1					ACTN4	CDKN2A
TP53	NMT1								POLE	NOTCH1								CUL4B	CDKN2A
TP53	CHD8								SMARCA4	NOTCH1								TUBGCP6	CDKN2A
TP53	RANBP2
TP53	RB1
PRRC2A	TP53
SAFB2	TP53
HNSC cancer gene of HNSC_S61			HNSC cancer gene of HNSC_S62			HNSC cancer gene of HNSC_S63			HNSC cancer gene of HNSC_S64			HNSC cancer gene of HNSC_S65			HNSC cancer gene of HNSC_S66			HNSC cancer gene of HNSC_S67			HNSC cancer gene of HNSC_S68
EEF1A1			EGFR			MYH9			NOTCH1			NOTCH1			CDKN2A			CDKN2A			TP53
RB1			PIK3CA						SMARCA4			SMARCA4						HSPA8			CASP8
TP53

## Sheet: LUAD Subnetwork for 2 subtypes
Subnetwork Name	P-value of differentially propagated score	P-value of differentially mutated score	# of ME edges	P-value of patient survival in TCGA	P-value of patient survival in MSK-IMPACT	P-value of difference of GDSC drug response
LUAD_S21	0.00e+00	2.24e-02	18	0.858000	0.029800	DOCETAXEL	0.018097
						VINORELBINE	0.048340
LUAD_S22	0.00e+00	9.93e-01	8	0.189000	0.000041	GEMCITABINE	0.028458
						METHOTREXATE	0.018800
						VINORELBINE	0.079916
Adjacent matrix of LUAD_S21			Adjacent matrix of LUAD_S22
KRAS	EGFR		STK11	MARK1
MET	EGFR		TP53	CUL9
NF1	KRAS		TP53	ATM
PIK3CA	KRAS		TP53	STK11
SOS1	EGFR
SOS1	KRAS
BRAF	KRAS
KEAP1	EGFR
KEAP1	NFE2L2
LUAD cancer gene of LUAD_S21			LUAD cancer gene of LUAD_S22
EGFR			STK11
KRAS			TP53
MET
NF1
NFE2L2
BRAF
KEAP1

## Sheet: LUAD Subnetwork for 3 subtypes
Subnetwork Name	P-value of differentially propagated score	P-value of differentially mutated score	# of ME edges	P-value of patient survival in TCGA	P-value of patient survival in MSK-IMPACT	P-value of difference of GDSC drug response
LUAD_S31	9.31e-13	6.89e-01	10	0.836000	0.002140
LUAD_S32	1.00e+00	1.71e-01	12	0.936000	0.008210	DOCETAXEL	0.002482
						METHOTREXATE	0.022069
						VINORELBINE	0.048321
LUAD_S33	1.00e+00	1.07e-13	10	0.343000	0.000041	GEMCITABINE	0.028458
						METHOTREXATE	0.044381
						VINORELBINE	0.079916
						PACLITAXEL	0.053147
Adjacent matrix of LUAD_S31			Adjacent matrix of LUAD_S32			Adjacent matrix of LUAD_S33
KRAS	EGFR		KRAS	EGFR		STK11	MARK1
MET	EGFR		MET	EGFR		TP53	CUL9
PIK3CA	KRAS		NF1	KRAS		TP53	ATM
BRAF	KRAS		SOS1	EGFR		TP53	POLA1
DOCK4	EGFR		SOS1	KRAS		TP53	STK11
			KEAP1	EGFR
LUAD cancer gene of LUAD_S31			LUAD cancer gene of LUAD_S32			LUAD cancer gene of LUAD_S33
EGFR			EGFR			STK11
KRAS			KRAS			TP53
MET			MET
BRAF			NF1
			KEAP1

## Sheet: LUAD Subnetwork for 4 subtypes
Subnetwork Name	P-value of differentially propagated score	P-value of differentially mutated score	# of ME edges	P-value of patient survival in TCGA	P-value of patient survival in MSK-IMPACT	P-value of difference of GDSC drug response
LUAD_S41	0.00e+00	9.80e-01	30	0.776000	0.007900	GEFITINIB	0.017916
LUAD_S42	5.79e-03	9.96e-01	2	0.368000	0.052900
LUAD_S43	0.00e+00	2.47e-02	4	0.106000	0.023900	GEMCITABINE	0.034502
						PACLITAXEL	0.037762
LUAD_S44	4.30e-02	2.46e-05	14	0.232000	0.004290	GEMCITABINE	0.001133
						METHOTREXATE	0.044381
						VINORELBINE	0.054254
						PACLITAXEL	0.038462
LUAD_S45	1.00e+00	3.00e-01	18	1.000000	0.038100	DOCETAXEL	0.016181
						VINORELBINE	0.037378
Adjacent matrix of LUAD_S41			Adjacent matrix of LUAD_S42			Adjacent matrix of LUAD_S43			Adjacent matrix of LUAD_S44			Adjacent matrix of LUAD_S45
NRG1	EGFR		HDAC9	SMARCA4		STK11	CYLC2		STK11	STK11IP		KRAS	EGFR
JAK2	EGFR					LATS1	STK11		STK11	CYLC2		MET	EGFR
KRAS	EGFR								STK11	MARK1		NF1	KRAS
KRAS	IL2RA								TP53	CUL9		PIK3CA	KRAS
KRAS	IL3RA								TP53	ATM		PTPRF	EGFR
MET	EGFR								TP53	POLA1		SOS1	EGFR
PDGFRB	EGFR								TP53	STK11		SOS1	KRAS
PIK3CA	KRAS											KEAP1	EGFR
MAP2K3	EGFR											KEAP1	NFE2L2
SOS1	EGFR
SOS1	KRAS
BRAF	KRAS
TTI1	EGFR
DOCK4	EGFR
BCLAF1	EGFR
LUAD cancer gene of LUAD_S41			LUAD cancer gene of LUAD_S42			LUAD cancer gene of LUAD_S43			LUAD cancer gene of LUAD_S44			LUAD cancer gene of LUAD_S45
EGFR			SMARCA4			STK11			STK11			EGFR
KRAS									TP53			KRAS
MET												MET
BRAF												NF1
												NFE2L2
												KEAP1

## Sheet: LUAD Subnetwork for 5 subtypes
Subnetwork Name	P-value of differentially propagated score	P-value of differentially mutated score	# of ME edges	P-value of patient survival in TCGA	P-value of patient survival in MSK-IMPACT	P-value of difference of GDSC drug response
LUAD_S51	1.00e+00	6.24e-14	2	0.228000	0.000088	METHOTREXATE	0.037659
						VINORELBINE	0.050517
						GEFITINIB	0.046691
						AFATINIB	0.093955
LUAD_S52	1.00e+00	1.00e+00	40	0.859000	0.007360	GEMCITABINE	0.078536
						VINORELBINE	0.041036
						GEFITINIB	0.023168
						AFATINIB	0.092146
LUAD_S53	0.00e+00	2.48e-02	14	0.232000	0.004290	GEMCITABINE	0.001133
						METHOTREXATE	0.044381
						VINORELBINE	0.054254
						PACLITAXEL	0.038462
LUAD_S54	0.00e+00	3.33e-03	18	1.000000	0.038100	DOCETAXEL	0.016181
						VINORELBINE	0.037378
LUAD_S55	6.46e-04	1.35e-06	4	0.043000	0.004400	PACLITAXEL	0.037762
Adjacent matrix of LUAD_S51			Adjacent matrix of LUAD_S52			Adjacent matrix of LUAD_S53			Adjacent matrix of LUAD_S54			Adjacent matrix of LUAD_S55
TP53	ATM		EGFR	UBE4B		STK11	STK11IP		KRAS	EGFR		STK11	STK11IP
			ERBB4	EGFR		STK11	CYLC2		MET	EGFR		STK11	CYLC2
			NRG1	EGFR		STK11	MARK1		NF1	KRAS
			JAK2	EGFR		TP53	CUL9		PIK3CA	KRAS
			KRAS	EGFR		TP53	ATM		PTPRF	EGFR
			KRAS	IL2RA		TP53	POLA1		SOS1	EGFR
			KRAS	IL3RA		TP53	STK11		SOS1	KRAS
			LRP2	EGFR					KEAP1	EGFR
			MET	EGFR					KEAP1	NFE2L2
			NF1	KRAS
			PDGFRB	EGFR
			PIK3CA	KRAS
			PRKDC	EGFR
			MAP2K3	EGFR
			SOS1	EGFR
			SOS1	KRAS
			BRAF	KRAS
			TTI1	EGFR
			DOCK4	EGFR
			BCLAF1	EGFR
LUAD cancer gene of LUAD_S51			LUAD cancer gene of LUAD_S52			LUAD cancer gene of LUAD_S53			LUAD cancer gene of LUAD_S54			LUAD cancer gene of LUAD_S55
TP53			EGFR			STK11			EGFR			STK11
			KRAS			TP53			KRAS
			MET						MET
			NF1						NF1
			BRAF						NFE2L2
									KEAP1

## Sheet: LUAD Subnetwork for 6 subtypes
Subnetwork Name	P-value of differentially propagated score	P-value of differentially mutated score	# of ME edges	P-value of patient survival in TCGA	P-value of patient survival in MSK-IMPACT	P-value of difference of GDSC drug response
LUAD_S61	1.80e-02	1.00e+00	14	0.232000	0.004290	GEMCITABINE	0.001133
						METHOTREXATE	0.044381
						VINORELBINE	0.054254
						PACLITAXEL	0.038462
LUAD_S62	1.00e+00	1.00e+00	18	1.000000	0.038100	DOCETAXEL	0.016181
						VINORELBINE	0.037378
LUAD_S63	1.00e+00	1.00e+00	4	0.043000	0.004400	PACLITAXEL	0.037762
LUAD_S64	6.84e-12	5.39e-01	30	0.757000	0.008910	GEMCITABINE	0.026623
						DOCETAXEL	0.031253
						VINORELBINE	0.004253
						GEFITINIB	0.094022
						PACLITAXEL	0.050699
LUAD_S65	4.48e-01	3.06e-03	2	0.228000	0.000088	METHOTREXATE	0.037659
						VINORELBINE	0.050517
						GEFITINIB	0.046691
						AFATINIB	0.093955
Adjacent matrix of LUAD_S61			Adjacent matrix of LUAD_S62			Adjacent matrix of LUAD_S63			Adjacent matrix of LUAD_S64			Adjacent matrix of LUAD_S65
STK11	STK11IP		KRAS	EGFR		STK11	STK11IP		ERBB4	EGFR		TP53	ATM
STK11	CYLC2		MET	EGFR		STK11	CYLC2		NRG1	EGFR
STK11	MARK1		NF1	KRAS					JAK2	EGFR
TP53	CUL9		PIK3CA	KRAS					KRAS	EGFR
TP53	ATM		PTPRF	EGFR					KRAS	IL3RA
TP53	POLA1		SOS1	EGFR					LRP2	EGFR
TP53	STK11		SOS1	KRAS					MET	EGFR
			KEAP1	EGFR					PDGFRB	EGFR
			KEAP1	NFE2L2					PIK3CA	KRAS
									PRKDC	EGFR
									SOS1	EGFR
									SOS1	KRAS
									BRAF	KRAS
									DOCK4	EGFR
									BCLAF1	EGFR
LUAD cancer gene of LUAD_S61			LUAD cancer gene of LUAD_S62			LUAD cancer gene of LUAD_S63			LUAD cancer gene of LUAD_S64			LUAD cancer gene of LUAD_S65
STK11			EGFR			STK11			EGFR			TP53
TP53			KRAS						KRAS
			MET						MET
			NF1						BRAF
			NFE2L2
			KEAP1

[truncated: 30 more sheets: GBM Subnetwork for 2 subtypes, GBM Subnetwork for 3 subtypes, GBM Subnetwork for 4 subtypes, GBM Subnetwork for 5 subtypes, GBM Subnetwork for 6 subtypes, BLCA Subnetwork for 2 subtypes, BLCA Subnetwork for 3 subtypes, BLCA Subnetwork for 4 subtypes, BLCA Subnetwork for 5 subtypes, BLCA Subnetwork for 6 subtypes, OV Subnetwork for 2 subtypes, OV Subnetwork for 3 subtypes, OV Subnetwork for 4 subtypes, OV Subnetwork for 5 subtypes, OV Subnetwork for 6 subtypes, SARC Subnetwork for 2 subtypes, SARC Subnetwork for 3 subtypes, SARC Subnetwork for 4 subtypes, SARC Subnetwork for 5 subtypes, SARC Subnetwork for 6 subtypes …]
