# Supplementary material for: Typing tumors using pathways selected by somatic evolution
Source: Nat Commun. 2018 Oct 8;9:4159. doi: 10.1038/s41467-018-06464-y (PMC6175900; doi:10.1038/s41467-018-06464-y)
Supplement: Supplementary file 5 — Supplementary Data 2 [file 41467_2018_6464_MOESM5_ESM.xlsx]

## Sheet: Sheet1
source	target	cancer_type
USP42	TP53	BLCA, GBM
PDGFRB	EGFR	GBM, LUAD
TP53	CD44	GBM, HNSC
TP53	ATM	OV, BLCA, LUAD
TP53	KMT2A	SARC, HNSC
TP53	CUL9	LIHC, LUAD
TP53	HRAS	BLCA, HNSC
TP53	MTA2	HNSC, LUAD
TP53	ARID1A	BLCA, LIHC
LRP2	EGFR	GBM, LUAD
MAP2K3	EGFR	GBM, LUAD
