# Supplementary material for: Typing tumors using pathways selected by somatic evolution
Source: Nat Commun. 2018 Oct 8;9:4159. doi: 10.1038/s41467-018-06464-y (PMC6175900; doi:10.1038/s41467-018-06464-y)
Supplement: Supplementary file 6 — Supplementary Data 3 [file 41467_2018_6464_MOESM6_ESM.xlsx]

## Sheet: ESP_GO
NBS ESP	Gene Ontology terms known to be related to cancer	Pvalue (one tail rank sum test)
THCA_211	GO_CELLULAR_RESPONSE_TO_VASCULAR_ENDOTHELIAL_GROWTH_FACTOR_STIMULUS	0.00166878
THCA_211	GO_GROWTH_FACTOR_ACTIVITY	0.000910274
THCA_211	GO_GROWTH_FACTOR_RECEPTOR_BINDING	0.00388458
THCA_211	GO_INSULIN_LIKE_GROWTH_FACTOR_RECEPTOR_BINDING	0.00230402
THCA_211	GO_KERATINOCYTE_PROLIFERATION	0.000173688
THCA_211	GO_LYMPHANGIOGENESIS	8.72241e-05
THCA_211	GO_PLATELET_DERIVED_GROWTH_FACTOR_RECEPTOR_BINDING	0.000678393
THCA_211	GO_PLATELET_DERIVED_GROWTH_FACTOR_RECEPTOR_SIGNALING_PATHWAY	0.000637351
THCA_211	GO_POSITIVE_REGULATION_OF_SPROUTING_ANGIOGENESIS	0.00708727
THCA_211	GO_POSITIVE_REGULATION_OF_TRANSFORMING_GROWTH_FACTOR_BETA_PRODUCTION	0.00018528
THCA_211	GO_POSITIVE_REGULATION_OF_VASCULAR_ENDOTHELIAL_GROWTH_FACTOR_RECEPTOR_SIGNALING_PATHWAY	0.00106231
THCA_211	GO_REGULATION_OF_CELL_MIGRATION_INVOLVED_IN_SPROUTING_ANGIOGENESIS	0.000805531
THCA_211	GO_REGULATION_OF_GLIAL_CELL_PROLIFERATION	0.00716614
THCA_211	GO_REGULATION_OF_SPROUTING_ANGIOGENESIS	0.00966045
THCA_211	GO_REGULATION_OF_VASCULAR_ENDOTHELIAL_GROWTH_FACTOR_RECEPTOR_SIGNALING_PATHWAY	0.00905939
THCA_211	GO_VASCULAR_ENDOTHELIAL_GROWTH_FACTOR_SIGNALING_PATHWAY	0.00174531
THCA_321	GO_CELLULAR_RESPONSE_TO_VASCULAR_ENDOTHELIAL_GROWTH_FACTOR_STIMULUS	0.00166878
THCA_321	GO_GROWTH_FACTOR_ACTIVITY	0.000910274
THCA_321	GO_GROWTH_FACTOR_RECEPTOR_BINDING	0.00388458
THCA_321	GO_INSULIN_LIKE_GROWTH_FACTOR_RECEPTOR_BINDING	0.00230402
THCA_321	GO_KERATINOCYTE_PROLIFERATION	0.000173688
THCA_321	GO_LYMPHANGIOGENESIS	8.72241e-05
THCA_321	GO_PLATELET_DERIVED_GROWTH_FACTOR_RECEPTOR_BINDING	0.000678393
THCA_321	GO_PLATELET_DERIVED_GROWTH_FACTOR_RECEPTOR_SIGNALING_PATHWAY	0.000637351
THCA_321	GO_POSITIVE_REGULATION_OF_SPROUTING_ANGIOGENESIS	0.00708727
THCA_321	GO_POSITIVE_REGULATION_OF_TRANSFORMING_GROWTH_FACTOR_BETA_PRODUCTION	0.00018528
THCA_321	GO_POSITIVE_REGULATION_OF_VASCULAR_ENDOTHELIAL_GROWTH_FACTOR_RECEPTOR_SIGNALING_PATHWAY	0.00106231
THCA_321	GO_REGULATION_OF_CELL_MIGRATION_INVOLVED_IN_SPROUTING_ANGIOGENESIS	0.000805531
THCA_321	GO_REGULATION_OF_GLIAL_CELL_PROLIFERATION	0.00716614
THCA_321	GO_REGULATION_OF_SPROUTING_ANGIOGENESIS	0.00966045
THCA_321	GO_REGULATION_OF_VASCULAR_ENDOTHELIAL_GROWTH_FACTOR_RECEPTOR_SIGNALING_PATHWAY	0.00905939
THCA_321	GO_VASCULAR_ENDOTHELIAL_GROWTH_FACTOR_SIGNALING_PATHWAY	0.00174531
THCA_411	GO_CELLULAR_RESPONSE_TO_VASCULAR_ENDOTHELIAL_GROWTH_FACTOR_STIMULUS	0.00166878
THCA_411	GO_GROWTH_FACTOR_ACTIVITY	0.000910274
THCA_411	GO_GROWTH_FACTOR_RECEPTOR_BINDING	0.00388458
THCA_411	GO_INSULIN_LIKE_GROWTH_FACTOR_RECEPTOR_BINDING	0.00230402
THCA_411	GO_KERATINOCYTE_PROLIFERATION	0.000173688
THCA_411	GO_LYMPHANGIOGENESIS	8.72241e-05
THCA_411	GO_PLATELET_DERIVED_GROWTH_FACTOR_RECEPTOR_BINDING	0.000678393
THCA_411	GO_PLATELET_DERIVED_GROWTH_FACTOR_RECEPTOR_SIGNALING_PATHWAY	0.000637351
THCA_411	GO_POSITIVE_REGULATION_OF_SPROUTING_ANGIOGENESIS	0.00708727
THCA_411	GO_POSITIVE_REGULATION_OF_TRANSFORMING_GROWTH_FACTOR_BETA_PRODUCTION	0.00018528
THCA_411	GO_POSITIVE_REGULATION_OF_VASCULAR_ENDOTHELIAL_GROWTH_FACTOR_RECEPTOR_SIGNALING_PATHWAY	0.00106231
THCA_411	GO_REGULATION_OF_CELL_MIGRATION_INVOLVED_IN_SPROUTING_ANGIOGENESIS	0.000805531
THCA_411	GO_REGULATION_OF_GLIAL_CELL_PROLIFERATION	0.00716614
THCA_411	GO_REGULATION_OF_SPROUTING_ANGIOGENESIS	0.00966045
THCA_411	GO_REGULATION_OF_VASCULAR_ENDOTHELIAL_GROWTH_FACTOR_RECEPTOR_SIGNALING_PATHWAY	0.00905939
THCA_411	GO_VASCULAR_ENDOTHELIAL_GROWTH_FACTOR_SIGNALING_PATHWAY	0.00174531
THCA_521	GO_CELLULAR_RESPONSE_TO_VASCULAR_ENDOTHELIAL_GROWTH_FACTOR_STIMULUS	2.3262e-05
THCA_521	GO_CELL_MIGRATION_INVOLVED_IN_SPROUTING_ANGIOGENESIS	0.00103927
THCA_521	GO_GROWTH_FACTOR_ACTIVITY	9.86134e-06
THCA_521	GO_GROWTH_FACTOR_RECEPTOR_BINDING	6.16853e-05
THCA_521	GO_INSULIN_LIKE_GROWTH_FACTOR_RECEPTOR_BINDING	0.000422587
THCA_521	GO_KERATINOCYTE_PROLIFERATION	0.000240915
THCA_521	GO_LYMPHANGIOGENESIS	4.28565e-07
THCA_521	GO_PLATELET_DERIVED_GROWTH_FACTOR_RECEPTOR_BINDING	7.0251e-06
THCA_521	GO_PLATELET_DERIVED_GROWTH_FACTOR_RECEPTOR_SIGNALING_PATHWAY	6.3618e-06
THCA_521	GO_POSITIVE_REGULATION_OF_ENDOTHELIAL_CELL_PROLIFERATION	0.00343136
THCA_521	GO_POSITIVE_REGULATION_OF_SPROUTING_ANGIOGENESIS	0.000166328
THCA_521	GO_POSITIVE_REGULATION_OF_TRANSFORMING_GROWTH_FACTOR_BETA_PRODUCTION	2.11845e-05
THCA_521	GO_POSITIVE_REGULATION_OF_VASCULAR_ENDOTHELIAL_GROWTH_FACTOR_RECEPTOR_SIGNALING_PATHWAY	1.21829e-05
THCA_521	GO_REGULATION_OF_CELL_MIGRATION_INVOLVED_IN_SPROUTING_ANGIOGENESIS	8.63133e-06
THCA_521	GO_REGULATION_OF_ENDOTHELIAL_CELL_PROLIFERATION	0.00548866
THCA_521	GO_REGULATION_OF_GLIAL_CELL_PROLIFERATION	0.00188357
THCA_521	GO_REGULATION_OF_SPROUTING_ANGIOGENESIS	0.000249056
THCA_521	GO_REGULATION_OF_VASCULAR_ENDOTHELIAL_GROWTH_FACTOR_RECEPTOR_SIGNALING_PATHWAY	0.000238257
THCA_521	GO_SPROUTING_ANGIOGENESIS	0.00281468
THCA_521	GO_VASCULAR_ENDOTHELIAL_GROWTH_FACTOR_SIGNALING_PATHWAY	2.70837e-05
THCA_551	GO_CELLULAR_RESPONSE_TO_EPIDERMAL_GROWTH_FACTOR_STIMULUS	0.00248292
THCA_551	GO_CELL_PROLIFERATION	5.46472e-09
THCA_551	GO_EPIDERMAL_GROWTH_FACTOR_RECEPTOR_BINDING	0.000746704
THCA_551	GO_GROWTH_FACTOR_BINDING	9.65467e-07
THCA_551	GO_INNER_CELL_MASS_CELL_PROLIFERATION	0.00139551
THCA_551	GO_INSULIN_LIKE_GROWTH_FACTOR_BINDING	0.00996724
THCA_551	GO_LEUKOCYTE_PROLIFERATION	2.89012e-05
THCA_551	GO_LOCOMOTION	7.02136e-10
THCA_551	GO_NEGATIVE_REGULATION_OF_B_CELL_PROLIFERATION	3.32088e-05
THCA_551	GO_NEGATIVE_REGULATION_OF_CELL_PROLIFERATION	0.0007827
THCA_551	GO_NEGATIVE_REGULATION_OF_ENDOTHELIAL_CELL_PROLIFERATION	4.6303e-15
THCA_551	GO_NEGATIVE_REGULATION_OF_EPITHELIAL_CELL_PROLIFERATION	0.00471886
THCA_551	GO_NEGATIVE_REGULATION_OF_FIBROBLAST_GROWTH_FACTOR_RECEPTOR_SIGNALING_PATHWAY	3.9906e-10
THCA_551	GO_NEGATIVE_REGULATION_OF_LEUKOCYTE_PROLIFERATION	2.87203e-10
THCA_551	GO_NEGATIVE_REGULATION_OF_LOCOMOTION	1.93879e-05
THCA_551	GO_NEGATIVE_REGULATION_OF_SMOOTH_MUSCLE_CELL_PROLIFERATION	6.89191e-06
THCA_551	GO_NEGATIVE_REGULATION_OF_T_CELL_PROLIFERATION	2.28974e-10
THCA_551	GO_PLATELET_DERIVED_GROWTH_FACTOR_BINDING	8.31312e-07
THCA_551	GO_POSITIVE_REGULATION_OF_B_CELL_PROLIFERATION	6.01799e-09
THCA_551	GO_POSITIVE_REGULATION_OF_CELL_PROLIFERATION	2.33011e-10
THCA_551	GO_POSITIVE_REGULATION_OF_FIBROBLAST_PROLIFERATION	1.01691e-10
THCA_551	GO_POSITIVE_REGULATION_OF_LEUKOCYTE_PROLIFERATION	5.73487e-09
THCA_551	GO_POSITIVE_REGULATION_OF_LOCOMOTION	2.38206e-09
THCA_551	GO_POSITIVE_REGULATION_OF_OSTEOBLAST_PROLIFERATION	0.00625794
THCA_551	GO_POSITIVE_REGULATION_OF_VASCULAR_ENDOTHELIAL_GROWTH_FACTOR_PRODUCTION	3.97912e-08
THCA_551	GO_REGULATION_OF_B_CELL_PROLIFERATION	5.82778e-09
THCA_551	GO_REGULATION_OF_CELLULAR_RESPONSE_TO_GROWTH_FACTOR_STIMULUS	5.78356e-06
THCA_551	GO_REGULATION_OF_CELLULAR_RESPONSE_TO_TRANSFORMING_GROWTH_FACTOR_BETA_STIMULUS	6.21423e-09
THCA_551	GO_REGULATION_OF_CELLULAR_RESPONSE_TO_VASCULAR_ENDOTHELIAL_GROWTH_FACTOR_STIMULUS	2.15663e-05
THCA_551	GO_REGULATION_OF_CELL_PROLIFERATION	3.1873e-10
THCA_551	GO_REGULATION_OF_EPIDERMAL_GROWTH_FACTOR_ACTIVATED_RECEPTOR_ACTIVITY	0.00707431
THCA_551	GO_REGULATION_OF_FIBROBLAST_PROLIFERATION	1.0727e-10
THCA_551	GO_REGULATION_OF_HEPATOCYTE_PROLIFERATION	1.5561e-10
THCA_551	GO_REGULATION_OF_LEUKOCYTE_PROLIFERATION	5.73487e-09
THCA_551	GO_REGULATION_OF_PLATELET_DERIVED_GROWTH_FACTOR_RECEPTOR_SIGNALING_PATHWAY	8.51094e-06
THCA_551	GO_REGULATION_OF_TRANSFORMING_GROWTH_FACTOR_BETA_PRODUCTION	7.90339e-05
THCA_551	GO_REGULATION_OF_TRANSFORMING_GROWTH_FACTOR_BETA_RECEPTOR_SIGNALING_PATHWAY	6.21423e-09
THCA_551	GO_REGULATION_OF_T_CELL_PROLIFERATION	0.00162345
THCA_551	GO_REGULATION_OF_VASCULAR_ENDOTHELIAL_GROWTH_FACTOR_PRODUCTION	3.97912e-08
THCA_551	GO_RESPONSE_TO_EPIDERMAL_GROWTH_FACTOR	0.00165239
THCA_551	GO_RESPONSE_TO_FIBROBLAST_GROWTH_FACTOR	2.84647e-07
THCA_551	GO_RESPONSE_TO_GROWTH_FACTOR	0.000489702
THCA_551	GO_RESPONSE_TO_TRANSFORMING_GROWTH_FACTOR_BETA	5.50342e-07
THCA_551	GO_TRANSFORMING_GROWTH_FACTOR_BETA_BINDING	0.00442661
THCA_551	GO_TRANSFORMING_GROWTH_FACTOR_BETA_RECEPTOR_SIGNALING_PATHWAY	1.58304e-05
THCA_551	GO_T_CELL_PROLIFERATION	7.07857e-05
THCA_551	GO_VASCULAR_ENDOTHELIAL_GROWTH_FACTOR_RECEPTOR_SIGNALING_PATHWAY	0.000732737
THCA_621	GO_CELLULAR_RESPONSE_TO_VASCULAR_ENDOTHELIAL_GROWTH_FACTOR_STIMULUS	2.3262e-05
THCA_621	GO_CELL_MIGRATION_INVOLVED_IN_SPROUTING_ANGIOGENESIS	0.00103927
THCA_621	GO_GROWTH_FACTOR_ACTIVITY	9.86134e-06
THCA_621	GO_GROWTH_FACTOR_RECEPTOR_BINDING	6.16853e-05
THCA_621	GO_INSULIN_LIKE_GROWTH_FACTOR_RECEPTOR_BINDING	0.000422587
THCA_621	GO_KERATINOCYTE_PROLIFERATION	0.000240915
THCA_621	GO_LYMPHANGIOGENESIS	4.28565e-07
THCA_621	GO_PLATELET_DERIVED_GROWTH_FACTOR_RECEPTOR_BINDING	7.0251e-06
THCA_621	GO_PLATELET_DERIVED_GROWTH_FACTOR_RECEPTOR_SIGNALING_PATHWAY	6.3618e-06
THCA_621	GO_POSITIVE_REGULATION_OF_ENDOTHELIAL_CELL_PROLIFERATION	0.00343136
THCA_621	GO_POSITIVE_REGULATION_OF_SPROUTING_ANGIOGENESIS	0.000166328
THCA_621	GO_POSITIVE_REGULATION_OF_TRANSFORMING_GROWTH_FACTOR_BETA_PRODUCTION	2.11845e-05
THCA_621	GO_POSITIVE_REGULATION_OF_VASCULAR_ENDOTHELIAL_GROWTH_FACTOR_RECEPTOR_SIGNALING_PATHWAY	1.21829e-05
THCA_621	GO_REGULATION_OF_CELL_MIGRATION_INVOLVED_IN_SPROUTING_ANGIOGENESIS	8.63133e-06
THCA_621	GO_REGULATION_OF_ENDOTHELIAL_CELL_PROLIFERATION	0.00548866
THCA_621	GO_REGULATION_OF_GLIAL_CELL_PROLIFERATION	0.00188357
THCA_621	GO_REGULATION_OF_SPROUTING_ANGIOGENESIS	0.000249056
THCA_621	GO_REGULATION_OF_VASCULAR_ENDOTHELIAL_GROWTH_FACTOR_RECEPTOR_SIGNALING_PATHWAY	0.000238257
THCA_621	GO_SPROUTING_ANGIOGENESIS	0.00281468
THCA_621	GO_VASCULAR_ENDOTHELIAL_GROWTH_FACTOR_SIGNALING_PATHWAY	2.70837e-05
THCA_641	GO_CELLULAR_RESPONSE_TO_EPIDERMAL_GROWTH_FACTOR_STIMULUS	0.00248292
THCA_641	GO_CELL_PROLIFERATION	5.46472e-09
THCA_641	GO_EPIDERMAL_GROWTH_FACTOR_RECEPTOR_BINDING	0.000746704
THCA_641	GO_GROWTH_FACTOR_BINDING	9.65467e-07
THCA_641	GO_INNER_CELL_MASS_CELL_PROLIFERATION	0.00139551
THCA_641	GO_INSULIN_LIKE_GROWTH_FACTOR_BINDING	0.00996724
THCA_641	GO_LEUKOCYTE_PROLIFERATION	2.89012e-05
THCA_641	GO_LOCOMOTION	7.02136e-10
THCA_641	GO_NEGATIVE_REGULATION_OF_B_CELL_PROLIFERATION	3.32088e-05
THCA_641	GO_NEGATIVE_REGULATION_OF_CELL_PROLIFERATION	0.0007827
THCA_641	GO_NEGATIVE_REGULATION_OF_ENDOTHELIAL_CELL_PROLIFERATION	4.6303e-15
THCA_641	GO_NEGATIVE_REGULATION_OF_EPITHELIAL_CELL_PROLIFERATION	0.00471886
THCA_641	GO_NEGATIVE_REGULATION_OF_FIBROBLAST_GROWTH_FACTOR_RECEPTOR_SIGNALING_PATHWAY	3.9906e-10
THCA_641	GO_NEGATIVE_REGULATION_OF_LEUKOCYTE_PROLIFERATION	2.87203e-10
THCA_641	GO_NEGATIVE_REGULATION_OF_LOCOMOTION	1.93879e-05
THCA_641	GO_NEGATIVE_REGULATION_OF_SMOOTH_MUSCLE_CELL_PROLIFERATION	6.89191e-06
THCA_641	GO_NEGATIVE_REGULATION_OF_T_CELL_PROLIFERATION	2.28974e-10
THCA_641	GO_PLATELET_DERIVED_GROWTH_FACTOR_BINDING	8.31312e-07
THCA_641	GO_POSITIVE_REGULATION_OF_B_CELL_PROLIFERATION	6.01799e-09
THCA_641	GO_POSITIVE_REGULATION_OF_CELL_PROLIFERATION	2.33011e-10
THCA_641	GO_POSITIVE_REGULATION_OF_FIBROBLAST_PROLIFERATION	1.01691e-10
THCA_641	GO_POSITIVE_REGULATION_OF_LEUKOCYTE_PROLIFERATION	5.73487e-09
THCA_641	GO_POSITIVE_REGULATION_OF_LOCOMOTION	2.38206e-09
THCA_641	GO_POSITIVE_REGULATION_OF_OSTEOBLAST_PROLIFERATION	0.00625794
THCA_641	GO_POSITIVE_REGULATION_OF_VASCULAR_ENDOTHELIAL_GROWTH_FACTOR_PRODUCTION	3.97912e-08
THCA_641	GO_REGULATION_OF_B_CELL_PROLIFERATION	5.82778e-09
THCA_641	GO_REGULATION_OF_CELLULAR_RESPONSE_TO_GROWTH_FACTOR_STIMULUS	5.78356e-06
THCA_641	GO_REGULATION_OF_CELLULAR_RESPONSE_TO_TRANSFORMING_GROWTH_FACTOR_BETA_STIMULUS	6.21423e-09
THCA_641	GO_REGULATION_OF_CELLULAR_RESPONSE_TO_VASCULAR_ENDOTHELIAL_GROWTH_FACTOR_STIMULUS	2.15663e-05
THCA_641	GO_REGULATION_OF_CELL_PROLIFERATION	3.1873e-10
THCA_641	GO_REGULATION_OF_EPIDERMAL_GROWTH_FACTOR_ACTIVATED_RECEPTOR_ACTIVITY	0.00707431
THCA_641	GO_REGULATION_OF_FIBROBLAST_PROLIFERATION	1.0727e-10
THCA_641	GO_REGULATION_OF_HEPATOCYTE_PROLIFERATION	1.5561e-10
THCA_641	GO_REGULATION_OF_LEUKOCYTE_PROLIFERATION	5.73487e-09
THCA_641	GO_REGULATION_OF_PLATELET_DERIVED_GROWTH_FACTOR_RECEPTOR_SIGNALING_PATHWAY	8.51094e-06
THCA_641	GO_REGULATION_OF_TRANSFORMING_GROWTH_FACTOR_BETA_PRODUCTION	7.90339e-05
THCA_641	GO_REGULATION_OF_TRANSFORMING_GROWTH_FACTOR_BETA_RECEPTOR_SIGNALING_PATHWAY	6.21423e-09
THCA_641	GO_REGULATION_OF_T_CELL_PROLIFERATION	0.00162345
THCA_641	GO_REGULATION_OF_VASCULAR_ENDOTHELIAL_GROWTH_FACTOR_PRODUCTION	3.97912e-08
THCA_641	GO_RESPONSE_TO_EPIDERMAL_GROWTH_FACTOR	0.00165239
THCA_641	GO_RESPONSE_TO_FIBROBLAST_GROWTH_FACTOR	2.84647e-07
THCA_641	GO_RESPONSE_TO_GROWTH_FACTOR	0.000489702
THCA_641	GO_RESPONSE_TO_TRANSFORMING_GROWTH_FACTOR_BETA	5.50342e-07
THCA_641	GO_TRANSFORMING_GROWTH_FACTOR_BETA_BINDING	0.00442661
THCA_641	GO_TRANSFORMING_GROWTH_FACTOR_BETA_RECEPTOR_SIGNALING_PATHWAY	1.58304e-05
THCA_641	GO_T_CELL_PROLIFERATION	7.07857e-05
THCA_641	GO_VASCULAR_ENDOTHELIAL_GROWTH_FACTOR_RECEPTOR_SIGNALING_PATHWAY	0.000732737
LIHC_212	GO_INNER_CELL_MASS_CELL_PROLIFERATION	0.00747657
LIHC_212	GO_NEGATIVE_REGULATION_OF_KERATINOCYTE_PROLIFERATION	0.00560095
LIHC_212	GO_NEUROBLAST_PROLIFERATION	0.00484879
LIHC_332	GO_KERATINOCYTE_PROLIFERATION	0.00657265
LIHC_332	GO_NEGATIVE_REGULATION_OF_SPROUTING_ANGIOGENESIS	0.00703167
LIHC_431	GO_CELL_PROLIFERATION_IN_FOREBRAIN	9.80506e-06
LIHC_431	GO_GROWTH_FACTOR_RECEPTOR_BINDING	5.33992e-06
LIHC_431	GO_KERATINOCYTE_PROLIFERATION	0.00579729
LIHC_431	GO_NEGATIVE_REGULATION_OF_SPROUTING_ANGIOGENESIS	1.97664e-07
LIHC_431	GO_PLATELET_DERIVED_GROWTH_FACTOR_BINDING	0.000145197
LIHC_431	GO_POSITIVE_REGULATION_OF_CARDIAC_MUSCLE_CELL_PROLIFERATION	2.1162e-06
LIHC_431	GO_POSITIVE_REGULATION_OF_EPIDERMAL_GROWTH_FACTOR_ACTIVATED_RECEPTOR_ACTIVITY	0.000824449
LIHC_431	GO_REGULATION_OF_CELLULAR_RESPONSE_TO_GROWTH_FACTOR_STIMULUS	0.00870368
LIHC_431	GO_REGULATION_OF_EPIDERMAL_GROWTH_FACTOR_ACTIVATED_RECEPTOR_ACTIVITY	0.000111332
LIHC_431	GO_REGULATION_OF_TRANSFORMING_GROWTH_FACTOR_BETA_PRODUCTION	0.00118808
LIHC_431	GO_RESPONSE_TO_NERVE_GROWTH_FACTOR	3.18244e-06
LIHC_531	GO_CELL_PROLIFERATION_IN_FOREBRAIN	0.000192706
LIHC_531	GO_GROWTH_FACTOR_RECEPTOR_BINDING	2.84426e-05
LIHC_531	GO_NEGATIVE_REGULATION_OF_SPROUTING_ANGIOGENESIS	2.02997e-06
LIHC_531	GO_PLATELET_DERIVED_GROWTH_FACTOR_BINDING	0.000996056
LIHC_531	GO_POSITIVE_REGULATION_OF_CARDIAC_MUSCLE_CELL_PROLIFERATION	2.99014e-05
LIHC_531	GO_POSITIVE_REGULATION_OF_EPIDERMAL_GROWTH_FACTOR_ACTIVATED_RECEPTOR_ACTIVITY	0.00453564
LIHC_531	GO_REGULATION_OF_EPIDERMAL_GROWTH_FACTOR_ACTIVATED_RECEPTOR_ACTIVITY	0.00138645
LIHC_531	GO_REGULATION_OF_TRANSFORMING_GROWTH_FACTOR_BETA_PRODUCTION	0.00797083
LIHC_531	GO_RESPONSE_TO_NERVE_GROWTH_FACTOR	1.43289e-05
LIHC_554	GO_CELL_PROLIFERATION	0.0090967
LIHC_554	GO_GROWTH_FACTOR_BINDING	0.00292223
LIHC_554	GO_INNER_CELL_MASS_CELL_PROLIFERATION	0.000967289
LIHC_554	GO_KERATINOCYTE_PROLIFERATION	0.00551781
LIHC_554	GO_LOCOMOTION	0.00628155
LIHC_554	GO_MUSCLE_CELL_PROLIFERATION	0.00735319
LIHC_554	GO_NEGATIVE_REGULATION_OF_CELL_PROLIFERATION	0.00652332
LIHC_554	GO_NEGATIVE_REGULATION_OF_ENDOTHELIAL_CELL_PROLIFERATION	0.00963731
LIHC_554	GO_NEGATIVE_REGULATION_OF_EPITHELIAL_CELL_PROLIFERATION	0.00800589
LIHC_554	GO_NEGATIVE_REGULATION_OF_KERATINOCYTE_PROLIFERATION	0.00168976
LIHC_554	GO_NEGATIVE_REGULATION_OF_LOCOMOTION	0.0090967
LIHC_554	GO_NEUROBLAST_PROLIFERATION	0.00138266
LIHC_554	GO_PLATELET_DERIVED_GROWTH_FACTOR_RECEPTOR_SIGNALING_PATHWAY	0.00687561
LIHC_554	GO_REGULATION_OF_CARDIAC_MUSCLE_CELL_PROLIFERATION	0.00713744
LIHC_554	GO_REGULATION_OF_CELL_PROLIFERATION	0.0044385
LIHC_554	GO_REGULATION_OF_ENDOTHELIAL_CELL_PROLIFERATION	0.00949959
LIHC_554	GO_REGULATION_OF_EPITHELIAL_CELL_PROLIFERATION	0.0079179
LIHC_554	GO_REGULATION_OF_HEPATOCYTE_PROLIFERATION	0.007802
LIHC_554	GO_REGULATION_OF_KERATINOCYTE_PROLIFERATION	0.00400482
LIHC_554	GO_STRIATED_MUSCLE_CELL_PROLIFERATION	0.00628155
LIHC_554	GO_VASCULAR_ENDOTHELIAL_GROWTH_FACTOR_SIGNALING_PATHWAY	0.00282763
LIHC_621	GO_CELL_PROLIFERATION_IN_FOREBRAIN	9.80506e-06
LIHC_621	GO_GROWTH_FACTOR_RECEPTOR_BINDING	5.33992e-06
LIHC_621	GO_KERATINOCYTE_PROLIFERATION	0.00579729
LIHC_621	GO_NEGATIVE_REGULATION_OF_SPROUTING_ANGIOGENESIS	1.97664e-07
LIHC_621	GO_PLATELET_DERIVED_GROWTH_FACTOR_BINDING	0.000145197
LIHC_621	GO_POSITIVE_REGULATION_OF_CARDIAC_MUSCLE_CELL_PROLIFERATION	2.1162e-06
LIHC_621	GO_POSITIVE_REGULATION_OF_EPIDERMAL_GROWTH_FACTOR_ACTIVATED_RECEPTOR_ACTIVITY	0.000824449
LIHC_621	GO_REGULATION_OF_CELLULAR_RESPONSE_TO_GROWTH_FACTOR_STIMULUS	0.00870368
LIHC_621	GO_REGULATION_OF_EPIDERMAL_GROWTH_FACTOR_ACTIVATED_RECEPTOR_ACTIVITY	0.000111332
LIHC_621	GO_REGULATION_OF_TRANSFORMING_GROWTH_FACTOR_BETA_PRODUCTION	0.00118808
LIHC_621	GO_RESPONSE_TO_NERVE_GROWTH_FACTOR	3.18244e-06
LIHC_631	GO_CELL_PROLIFERATION_IN_FOREBRAIN	0.0016796
LIHC_631	GO_GROWTH_FACTOR_RECEPTOR_BINDING	6.54183e-05
LIHC_631	GO_NEGATIVE_REGULATION_OF_SPROUTING_ANGIOGENESIS	1.29701e-05
LIHC_631	GO_PLATELET_DERIVED_GROWTH_FACTOR_BINDING	0.000776449
LIHC_631	GO_POSITIVE_REGULATION_OF_CARDIAC_MUSCLE_CELL_PROLIFERATION	0.000389771
LIHC_631	GO_REGULATION_OF_EPIDERMAL_GROWTH_FACTOR_ACTIVATED_RECEPTOR_ACTIVITY	0.00304715
LIHC_631	GO_RESPONSE_TO_NERVE_GROWTH_FACTOR	4.52504e-05
LIHC_632	GO_GROWTH_FACTOR_BINDING	0.00353465
LIHC_632	GO_INNER_CELL_MASS_CELL_PROLIFERATION	0.00149587
LIHC_632	GO_MUSCLE_CELL_PROLIFERATION	0.00594129
LIHC_632	GO_NEGATIVE_REGULATION_OF_KERATINOCYTE_PROLIFERATION	0.0041497
LIHC_632	GO_NEUROBLAST_PROLIFERATION	0.00401952
LIHC_632	GO_REGULATION_OF_CARDIAC_MUSCLE_CELL_PROLIFERATION	0.00998598
LIHC_632	GO_REGULATION_OF_KERATINOCYTE_PROLIFERATION	0.00838791
LIHC_632	GO_STRIATED_MUSCLE_CELL_PROLIFERATION	0.00509171
LIHC_632	GO_VASCULAR_ENDOTHELIAL_GROWTH_FACTOR_SIGNALING_PATHWAY	0.00909015
LIHC_643	GO_GROWTH_FACTOR_BINDING	0.00524505
LIHC_643	GO_INNER_CELL_MASS_CELL_PROLIFERATION	0.000567605
LIHC_643	GO_INSULIN_LIKE_GROWTH_FACTOR_RECEPTOR_SIGNALING_PATHWAY	0.00941826
LIHC_643	GO_KERATINOCYTE_PROLIFERATION	0.00615222
LIHC_643	GO_LOCOMOTION	0.00343451
LIHC_643	GO_NEGATIVE_REGULATION_OF_CELL_PROLIFERATION	0.00478183
LIHC_643	GO_NEGATIVE_REGULATION_OF_ENDOTHELIAL_CELL_PROLIFERATION	0.00780245
LIHC_643	GO_NEGATIVE_REGULATION_OF_EPITHELIAL_CELL_PROLIFERATION	0.00645996
LIHC_643	GO_NEGATIVE_REGULATION_OF_KERATINOCYTE_PROLIFERATION	0.00180161
LIHC_643	GO_NEGATIVE_REGULATION_OF_LOCOMOTION	0.00703776
LIHC_643	GO_NEUROBLAST_PROLIFERATION	0.001403
LIHC_643	GO_PLATELET_DERIVED_GROWTH_FACTOR_RECEPTOR_SIGNALING_PATHWAY	0.00678114
LIHC_643	GO_POSITIVE_REGULATION_OF_VASCULAR_ENDOTHELIAL_GROWTH_FACTOR_PRODUCTION	0.00719582
LIHC_643	GO_REGULATION_OF_CARDIAC_MUSCLE_CELL_PROLIFERATION	0.00574763
LIHC_643	GO_REGULATION_OF_CELL_PROLIFERATION	0.00346215
LIHC_643	GO_REGULATION_OF_ENDOTHELIAL_CELL_PROLIFERATION	0.00768892
LIHC_643	GO_REGULATION_OF_EPITHELIAL_CELL_PROLIFERATION	0.00990046
LIHC_643	GO_REGULATION_OF_HEPATOCYTE_PROLIFERATION	0.00463575
LIHC_643	GO_REGULATION_OF_KERATINOCYTE_PROLIFERATION	0.00415534
LIHC_643	GO_REGULATION_OF_VASCULAR_ENDOTHELIAL_GROWTH_FACTOR_PRODUCTION	0.00724919
LIHC_643	GO_VASCULAR_ENDOTHELIAL_GROWTH_FACTOR_SIGNALING_PATHWAY	0.00247933
LIHC_652	GO_NEUROBLAST_PROLIFERATION	0.00444796
LUAD_211	GO_ANGIOGENESIS_INVOLVED_IN_WOUND_HEALING	6.5549e-07
LUAD_211	GO_B_CELL_PROLIFERATION	0.000235706
LUAD_211	GO_NEGATIVE_REGULATION_OF_B_CELL_PROLIFERATION	0.00818669
LUAD_311	GO_ANGIOGENESIS_INVOLVED_IN_WOUND_HEALING	2.24229e-08
LUAD_311	GO_B_CELL_PROLIFERATION	0.000362337
LUAD_311	GO_CELL_MIGRATION_INVOLVED_IN_SPROUTING_ANGIOGENESIS	0.00205145
LUAD_311	GO_STRIATED_MUSCLE_CELL_PROLIFERATION	0.00261673
LUAD_331	GO_ANGIOGENESIS_INVOLVED_IN_WOUND_HEALING	2.75559e-05
LUAD_331	GO_B_CELL_PROLIFERATION	0.00017234
LUAD_331	GO_NEGATIVE_REGULATION_OF_B_CELL_PROLIFERATION	0.00956026
LUAD_331	GO_STRIATED_MUSCLE_CELL_PROLIFERATION	0.00895732
LUAD_332	GO_ANGIOGENESIS_INVOLVED_IN_WOUND_HEALING	0.00546203
LUAD_421	GO_ANGIOGENESIS_INVOLVED_IN_WOUND_HEALING	3.66891e-09
LUAD_421	GO_B_CELL_PROLIFERATION	3.83248e-05
LUAD_421	GO_CELL_MIGRATION_INVOLVED_IN_SPROUTING_ANGIOGENESIS	0.00093954
LUAD_421	GO_NEGATIVE_REGULATION_OF_B_CELL_PROLIFERATION	0.0051804
LUAD_423	GO_EPIDERMAL_GROWTH_FACTOR_RECEPTOR_SIGNALING_PATHWAY	0.000577733
LUAD_423	GO_NEGATIVE_REGULATION_OF_T_CELL_PROLIFERATION	0.00206846
LUAD_423	GO_PLATELET_DERIVED_GROWTH_FACTOR_RECEPTOR_SIGNALING_PATHWAY	0.00755149
LUAD_423	GO_TRANSFORMING_GROWTH_FACTOR_BETA_RECEPTOR_BINDING	0.00589291
LUAD_431	GO_ANGIOGENESIS	0.00538194
LUAD_431	GO_CELLULAR_RESPONSE_TO_VASCULAR_ENDOTHELIAL_GROWTH_FACTOR_STIMULUS	0.00363448
LUAD_431	GO_EPIDERMAL_GROWTH_FACTOR_RECEPTOR_SIGNALING_PATHWAY	0.00266108
LUAD_431	GO_GROWTH_FACTOR_ACTIVITY	0.00151741
LUAD_431	GO_INSULIN_LIKE_GROWTH_FACTOR_RECEPTOR_BINDING	0.00141392
LUAD_431	GO_LOCOMOTION	0.00947762
LUAD_431	GO_LYMPHANGIOGENESIS	5.94986e-05
LUAD_431	GO_MESENCHYMAL_CELL_PROLIFERATION	0.00298237
LUAD_431	GO_NEURAL_PRECURSOR_CELL_PROLIFERATION	0.00256114
LUAD_431	GO_PLATELET_DERIVED_GROWTH_FACTOR_RECEPTOR_SIGNALING_PATHWAY	1.56389e-07
LUAD_431	GO_POSITIVE_REGULATION_OF_CELL_PROLIFERATION	0.00350208
LUAD_431	GO_POSITIVE_REGULATION_OF_EPIDERMAL_GROWTH_FACTOR_ACTIVATED_RECEPTOR_ACTIVITY	0.000167076
LUAD_431	GO_POSITIVE_REGULATION_OF_FIBROBLAST_PROLIFERATION	0.00112589
LUAD_431	GO_POSITIVE_REGULATION_OF_MESENCHYMAL_CELL_PROLIFERATION	0.00117326
LUAD_431	GO_POSITIVE_REGULATION_OF_NEURAL_PRECURSOR_CELL_PROLIFERATION	0.0030392
LUAD_431	GO_POSITIVE_REGULATION_OF_NEUROBLAST_PROLIFERATION	0.00422112
LUAD_431	GO_POSITIVE_REGULATION_OF_OSTEOBLAST_PROLIFERATION	2.6613e-05
LUAD_431	GO_REGULATION_OF_CARDIAC_MUSCLE_CELL_PROLIFERATION	0.00700583
LUAD_431	GO_REGULATION_OF_CELL_PROLIFERATION	0.00650496
LUAD_431	GO_REGULATION_OF_EPIDERMAL_GROWTH_FACTOR_ACTIVATED_RECEPTOR_ACTIVITY	0.000632573
LUAD_431	GO_REGULATION_OF_FIBROBLAST_GROWTH_FACTOR_RECEPTOR_SIGNALING_PATHWAY	0.00262499
LUAD_431	GO_REGULATION_OF_FIBROBLAST_PROLIFERATION	0.00129978
LUAD_431	GO_REGULATION_OF_MESENCHYMAL_CELL_PROLIFERATION	0.00125506
LUAD_431	GO_REGULATION_OF_MYOBLAST_PROLIFERATION	0.000181815
LUAD_431	GO_REGULATION_OF_VASCULAR_ENDOTHELIAL_GROWTH_FACTOR_RECEPTOR_SIGNALING_PATHWAY	0.00632941
LUAD_431	GO_RESPONSE_TO_PLATELET_DERIVED_GROWTH_FACTOR	0.00366343
LUAD_431	GO_STEM_CELL_PROLIFERATION	0.000382329
LUAD_431	GO_TRANSFORMING_GROWTH_FACTOR_BETA_RECEPTOR_BINDING	0.00235832
LUAD_431	GO_VASCULAR_ENDOTHELIAL_GROWTH_FACTOR_RECEPTOR_SIGNALING_PATHWAY	0.00441177
LUAD_431	GO_VASCULAR_ENDOTHELIAL_GROWTH_FACTOR_SIGNALING_PATHWAY	0.0099839
LUAD_441	GO_ANGIOGENESIS_INVOLVED_IN_WOUND_HEALING	0.00617526
LUAD_442	GO_ANGIOGENESIS_INVOLVED_IN_WOUND_HEALING	6.69105e-06
LUAD_442	GO_B_CELL_PROLIFERATION	0.00139946
LUAD_442	GO_MESENCHYMAL_CELL_PROLIFERATION	0.00745784
LUAD_442	GO_NEGATIVE_REGULATION_OF_B_CELL_PROLIFERATION	0.00448308
LUAD_531	GO_ANGIOGENESIS_INVOLVED_IN_WOUND_HEALING	7.18369e-09
LUAD_531	GO_B_CELL_PROLIFERATION	2.24088e-05
LUAD_531	GO_CELL_MIGRATION_INVOLVED_IN_SPROUTING_ANGIOGENESIS	0.00328377
LUAD_531	GO_NEGATIVE_REGULATION_OF_B_CELL_PROLIFERATION	0.00385203
LUAD_531	GO_REGULATION_OF_CELLULAR_RESPONSE_TO_TRANSFORMING_GROWTH_FACTOR_BETA_STIMULUS	0.00892256
LUAD_531	GO_REGULATION_OF_TRANSFORMING_GROWTH_FACTOR_BETA_RECEPTOR_SIGNALING_PATHWAY	0.00892256
LUAD_541	GO_ANGIOGENESIS_INVOLVED_IN_WOUND_HEALING	0.00617526
LUAD_542	GO_ANGIOGENESIS_INVOLVED_IN_WOUND_HEALING	6.69105e-06
LUAD_542	GO_B_CELL_PROLIFERATION	0.00139946
LUAD_542	GO_MESENCHYMAL_CELL_PROLIFERATION	0.00745784
LUAD_542	GO_NEGATIVE_REGULATION_OF_B_CELL_PROLIFERATION	0.00448308
LUAD_551	GO_ANGIOGENESIS	0.00394917
LUAD_551	GO_CELLULAR_RESPONSE_TO_VASCULAR_ENDOTHELIAL_GROWTH_FACTOR_STIMULUS	0.00227609
LUAD_551	GO_EPIDERMAL_GROWTH_FACTOR_RECEPTOR_SIGNALING_PATHWAY	0.00611833
LUAD_551	GO_GROWTH_FACTOR_ACTIVITY	0.000478107
LUAD_551	GO_INSULIN_LIKE_GROWTH_FACTOR_RECEPTOR_BINDING	4.44817e-05
LUAD_551	GO_LOCOMOTION	0.00559611
LUAD_551	GO_LYMPHANGIOGENESIS	6.40524e-05
LUAD_551	GO_MESENCHYMAL_CELL_PROLIFERATION	0.000603597
LUAD_551	GO_NEURAL_PRECURSOR_CELL_PROLIFERATION	0.00384023
LUAD_551	GO_PLATELET_DERIVED_GROWTH_FACTOR_RECEPTOR_SIGNALING_PATHWAY	1.40056e-06
LUAD_551	GO_POSITIVE_REGULATION_OF_ACTIVATED_T_CELL_PROLIFERATION	0.00256659
LUAD_551	GO_POSITIVE_REGULATION_OF_CELL_PROLIFERATION	0.00104054
LUAD_551	GO_POSITIVE_REGULATION_OF_EPIDERMAL_GROWTH_FACTOR_ACTIVATED_RECEPTOR_ACTIVITY	3.73132e-05
LUAD_551	GO_POSITIVE_REGULATION_OF_FIBROBLAST_PROLIFERATION	0.000638655
LUAD_551	GO_POSITIVE_REGULATION_OF_MESENCHYMAL_CELL_PROLIFERATION	0.000283354
LUAD_551	GO_POSITIVE_REGULATION_OF_NEURAL_PRECURSOR_CELL_PROLIFERATION	0.00532953
LUAD_551	GO_POSITIVE_REGULATION_OF_NEUROBLAST_PROLIFERATION	0.00755151
LUAD_551	GO_POSITIVE_REGULATION_OF_OSTEOBLAST_PROLIFERATION	4.7084e-06
LUAD_551	GO_POSITIVE_REGULATION_OF_STEM_CELL_PROLIFERATION	0.00959046
LUAD_551	GO_POSITIVE_REGULATION_OF_T_CELL_PROLIFERATION	0.00649276
LUAD_551	GO_REGULATION_OF_CELL_PROLIFERATION	0.00186633
LUAD_551	GO_REGULATION_OF_EPIDERMAL_GROWTH_FACTOR_ACTIVATED_RECEPTOR_ACTIVITY	0.00156523
LUAD_551	GO_REGULATION_OF_FIBROBLAST_GROWTH_FACTOR_RECEPTOR_SIGNALING_PATHWAY	0.00413689
LUAD_551	GO_REGULATION_OF_FIBROBLAST_PROLIFERATION	0.000646697
LUAD_551	GO_REGULATION_OF_KERATINOCYTE_PROLIFERATION	0.00555325
LUAD_551	GO_REGULATION_OF_MESENCHYMAL_CELL_PROLIFERATION	0.000309843
LUAD_551	GO_REGULATION_OF_MYOBLAST_PROLIFERATION	1.76062e-05
LUAD_551	GO_REGULATION_OF_T_CELL_PROLIFERATION	0.00921668
LUAD_551	GO_RESPONSE_TO_PLATELET_DERIVED_GROWTH_FACTOR	0.00235401
LUAD_551	GO_STEM_CELL_PROLIFERATION	0.000401168
LUAD_551	GO_TRANSFORMING_GROWTH_FACTOR_BETA_RECEPTOR_BINDING	0.00688732
LUAD_551	GO_VASCULAR_ENDOTHELIAL_GROWTH_FACTOR_RECEPTOR_SIGNALING_PATHWAY	0.00163013
LUAD_551	GO_VASCULAR_ENDOTHELIAL_GROWTH_FACTOR_SIGNALING_PATHWAY	0.00520725
LUAD_621	GO_ANGIOGENESIS_INVOLVED_IN_WOUND_HEALING	0.00617526
LUAD_622	GO_ANGIOGENESIS_INVOLVED_IN_WOUND_HEALING	6.69105e-06
LUAD_622	GO_B_CELL_PROLIFERATION	0.00139946
LUAD_622	GO_MESENCHYMAL_CELL_PROLIFERATION	0.00745784
LUAD_622	GO_NEGATIVE_REGULATION_OF_B_CELL_PROLIFERATION	0.00448308
LUAD_641	GO_ANGIOGENESIS	0.00394917
LUAD_641	GO_CELLULAR_RESPONSE_TO_VASCULAR_ENDOTHELIAL_GROWTH_FACTOR_STIMULUS	0.00227609
LUAD_641	GO_EPIDERMAL_GROWTH_FACTOR_RECEPTOR_SIGNALING_PATHWAY	0.00611833
LUAD_641	GO_GROWTH_FACTOR_ACTIVITY	0.000478107
LUAD_641	GO_INSULIN_LIKE_GROWTH_FACTOR_RECEPTOR_BINDING	4.44817e-05
LUAD_641	GO_LOCOMOTION	0.00559611
LUAD_641	GO_LYMPHANGIOGENESIS	6.40524e-05
LUAD_641	GO_MESENCHYMAL_CELL_PROLIFERATION	0.000603597
LUAD_641	GO_NEURAL_PRECURSOR_CELL_PROLIFERATION	0.00384023
LUAD_641	GO_PLATELET_DERIVED_GROWTH_FACTOR_RECEPTOR_SIGNALING_PATHWAY	1.40056e-06
LUAD_641	GO_POSITIVE_REGULATION_OF_ACTIVATED_T_CELL_PROLIFERATION	0.00256659
LUAD_641	GO_POSITIVE_REGULATION_OF_CELL_PROLIFERATION	0.00104054
LUAD_641	GO_POSITIVE_REGULATION_OF_EPIDERMAL_GROWTH_FACTOR_ACTIVATED_RECEPTOR_ACTIVITY	3.73132e-05
LUAD_641	GO_POSITIVE_REGULATION_OF_FIBROBLAST_PROLIFERATION	0.000638655
LUAD_641	GO_POSITIVE_REGULATION_OF_MESENCHYMAL_CELL_PROLIFERATION	0.000283354
LUAD_641	GO_POSITIVE_REGULATION_OF_NEURAL_PRECURSOR_CELL_PROLIFERATION	0.00532953
LUAD_641	GO_POSITIVE_REGULATION_OF_NEUROBLAST_PROLIFERATION	0.00755151
LUAD_641	GO_POSITIVE_REGULATION_OF_OSTEOBLAST_PROLIFERATION	4.7084e-06
LUAD_641	GO_POSITIVE_REGULATION_OF_STEM_CELL_PROLIFERATION	0.00959046
LUAD_641	GO_POSITIVE_REGULATION_OF_T_CELL_PROLIFERATION	0.00649276
LUAD_641	GO_REGULATION_OF_CELL_PROLIFERATION	0.00186633
LUAD_641	GO_REGULATION_OF_EPIDERMAL_GROWTH_FACTOR_ACTIVATED_RECEPTOR_ACTIVITY	0.00156523
LUAD_641	GO_REGULATION_OF_FIBROBLAST_GROWTH_FACTOR_RECEPTOR_SIGNALING_PATHWAY	0.00413689
LUAD_641	GO_REGULATION_OF_FIBROBLAST_PROLIFERATION	0.000646697
LUAD_641	GO_REGULATION_OF_KERATINOCYTE_PROLIFERATION	0.00555325
LUAD_641	GO_REGULATION_OF_MESENCHYMAL_CELL_PROLIFERATION	0.000309843
LUAD_641	GO_REGULATION_OF_MYOBLAST_PROLIFERATION	1.76062e-05
LUAD_641	GO_REGULATION_OF_T_CELL_PROLIFERATION	0.00921668
LUAD_641	GO_RESPONSE_TO_PLATELET_DERIVED_GROWTH_FACTOR	0.00235401
LUAD_641	GO_STEM_CELL_PROLIFERATION	0.000401168
LUAD_641	GO_TRANSFORMING_GROWTH_FACTOR_BETA_RECEPTOR_BINDING	0.00688732
LUAD_641	GO_VASCULAR_ENDOTHELIAL_GROWTH_FACTOR_RECEPTOR_SIGNALING_PATHWAY	0.00163013
LUAD_641	GO_VASCULAR_ENDOTHELIAL_GROWTH_FACTOR_SIGNALING_PATHWAY	0.00520725
LUAD_652	GO_ANGIOGENESIS_INVOLVED_IN_WOUND_HEALING	1.68098e-08
LUAD_652	GO_B_CELL_PROLIFERATION	2.49612e-05
LUAD_652	GO_CELL_MIGRATION_INVOLVED_IN_SPROUTING_ANGIOGENESIS	0.00346653
LUAD_652	GO_NEGATIVE_REGULATION_OF_B_CELL_PROLIFERATION	0.00776667
OV_411	GO_INSULIN_LIKE_GROWTH_FACTOR_BINDING	0.000846868
OV_411	GO_POSITIVE_REGULATION_OF_OSTEOBLAST_PROLIFERATION	0.0087246
GBM_211	GO_REGULATION_OF_OSTEOBLAST_PROLIFERATION	0.000673501
GBM_311	GO_REGULATION_OF_OSTEOBLAST_PROLIFERATION	0.000673501
GBM_312	GO_FIBROBLAST_GROWTH_FACTOR_RECEPTOR_SIGNALING_PATHWAY	0.00223723
GBM_312	GO_NEGATIVE_REGULATION_OF_CELLULAR_RESPONSE_TO_GROWTH_FACTOR_STIMULUS	0.00516067
GBM_312	GO_NEGATIVE_REGULATION_OF_CELLULAR_RESPONSE_TO_TRANSFORMING_GROWTH_FACTOR_BETA_STIMULUS	0.00471458
GBM_312	GO_NEGATIVE_REGULATION_OF_SPROUTING_ANGIOGENESIS	0.00914821
GBM_312	GO_NEGATIVE_REGULATION_OF_TRANSFORMING_GROWTH_FACTOR_BETA_RECEPTOR_SIGNALING_PATHWAY	0.00471458
GBM_312	GO_POSITIVE_REGULATION_OF_ACTIVATED_T_CELL_PROLIFERATION	0.00729399
GBM_312	GO_POSITIVE_REGULATION_OF_B_CELL_PROLIFERATION	0.00925571
GBM_312	GO_POSITIVE_REGULATION_OF_CELL_PROLIFERATION	0.00898918
GBM_312	GO_POSITIVE_REGULATION_OF_LEUKOCYTE_PROLIFERATION	0.00503458
GBM_312	GO_POSITIVE_REGULATION_OF_SMOOTH_MUSCLE_CELL_PROLIFERATION	0.00296258
GBM_312	GO_REGULATION_OF_ALPHA_BETA_T_CELL_PROLIFERATION	0.00867204
GBM_312	GO_REGULATION_OF_CELLULAR_RESPONSE_TO_GROWTH_FACTOR_STIMULUS	0.00980816
GBM_312	GO_REGULATION_OF_CELLULAR_RESPONSE_TO_TRANSFORMING_GROWTH_FACTOR_BETA_STIMULUS	0.00400346
GBM_312	GO_REGULATION_OF_CELLULAR_RESPONSE_TO_VASCULAR_ENDOTHELIAL_GROWTH_FACTOR_STIMULUS	0.00483129
GBM_312	GO_REGULATION_OF_CELL_PROLIFERATION_INVOLVED_IN_KIDNEY_DEVELOPMENT	0.00779216
GBM_312	GO_REGULATION_OF_FIBROBLAST_PROLIFERATION	0.00864813
GBM_312	GO_REGULATION_OF_MYOBLAST_PROLIFERATION	0.00821358
GBM_312	GO_REGULATION_OF_TRANSFORMING_GROWTH_FACTOR_BETA_RECEPTOR_SIGNALING_PATHWAY	0.00400346
GBM_312	GO_RESPONSE_TO_FIBROBLAST_GROWTH_FACTOR	0.00151377
GBM_312	GO_RESPONSE_TO_TRANSFORMING_GROWTH_FACTOR_BETA	0.00433769
GBM_312	GO_TRANSFORMING_GROWTH_FACTOR_BETA_RECEPTOR_SIGNALING_PATHWAY	0.00795603
GBM_411	GO_REGULATION_OF_OSTEOBLAST_PROLIFERATION	0.00377645
GBM_416	GO_FIBROBLAST_GROWTH_FACTOR_RECEPTOR_SIGNALING_PATHWAY	0.00223723
GBM_416	GO_NEGATIVE_REGULATION_OF_CELLULAR_RESPONSE_TO_GROWTH_FACTOR_STIMULUS	0.00516067
GBM_416	GO_NEGATIVE_REGULATION_OF_CELLULAR_RESPONSE_TO_TRANSFORMING_GROWTH_FACTOR_BETA_STIMULUS	0.00471458
GBM_416	GO_NEGATIVE_REGULATION_OF_SPROUTING_ANGIOGENESIS	0.00914821
GBM_416	GO_NEGATIVE_REGULATION_OF_TRANSFORMING_GROWTH_FACTOR_BETA_RECEPTOR_SIGNALING_PATHWAY	0.00471458
GBM_416	GO_POSITIVE_REGULATION_OF_ACTIVATED_T_CELL_PROLIFERATION	0.00729399
GBM_416	GO_POSITIVE_REGULATION_OF_B_CELL_PROLIFERATION	0.00925571
GBM_416	GO_POSITIVE_REGULATION_OF_CELL_PROLIFERATION	0.00898918
GBM_416	GO_POSITIVE_REGULATION_OF_LEUKOCYTE_PROLIFERATION	0.00503458
GBM_416	GO_POSITIVE_REGULATION_OF_SMOOTH_MUSCLE_CELL_PROLIFERATION	0.00296258
GBM_416	GO_REGULATION_OF_ALPHA_BETA_T_CELL_PROLIFERATION	0.00867204
GBM_416	GO_REGULATION_OF_CELLULAR_RESPONSE_TO_GROWTH_FACTOR_STIMULUS	0.00980816
GBM_416	GO_REGULATION_OF_CELLULAR_RESPONSE_TO_TRANSFORMING_GROWTH_FACTOR_BETA_STIMULUS	0.00400346
GBM_416	GO_REGULATION_OF_CELLULAR_RESPONSE_TO_VASCULAR_ENDOTHELIAL_GROWTH_FACTOR_STIMULUS	0.00483129
GBM_416	GO_REGULATION_OF_CELL_PROLIFERATION_INVOLVED_IN_KIDNEY_DEVELOPMENT	0.00779216
GBM_416	GO_REGULATION_OF_FIBROBLAST_PROLIFERATION	0.00864813
GBM_416	GO_REGULATION_OF_MYOBLAST_PROLIFERATION	0.00821358
GBM_416	GO_REGULATION_OF_TRANSFORMING_GROWTH_FACTOR_BETA_RECEPTOR_SIGNALING_PATHWAY	0.00400346
GBM_416	GO_RESPONSE_TO_FIBROBLAST_GROWTH_FACTOR	0.00151377
GBM_416	GO_RESPONSE_TO_TRANSFORMING_GROWTH_FACTOR_BETA	0.00433769
GBM_416	GO_TRANSFORMING_GROWTH_FACTOR_BETA_RECEPTOR_SIGNALING_PATHWAY	0.00795603
GBM_521	GO_REGULATION_OF_OSTEOBLAST_PROLIFERATION	0.00162481
GBM_541	GO_REGULATION_OF_OSTEOBLAST_PROLIFERATION	0.000651774
GBM_542	GO_EPIDERMAL_GROWTH_FACTOR_RECEPTOR_SIGNALING_PATHWAY	0.00940779
GBM_611	GO_REGULATION_OF_OSTEOBLAST_PROLIFERATION	0.00162481
GBM_661	GO_REGULATION_OF_OSTEOBLAST_PROLIFERATION	0.000651774
GBM_662	GO_EPIDERMAL_GROWTH_FACTOR_RECEPTOR_SIGNALING_PATHWAY	0.00940779
BLCA_211	GO_ANGIOGENESIS_INVOLVED_IN_WOUND_HEALING	0.0020535
BLCA_211	GO_B_CELL_PROLIFERATION	0.00577015
BLCA_211	GO_NEGATIVE_REGULATION_OF_STEM_CELL_PROLIFERATION	0.00429325
BLCA_211	GO_REGULATION_OF_MYOBLAST_PROLIFERATION	0.000691851
BLCA_211	GO_REGULATION_OF_STEM_CELL_PROLIFERATION	0.0032985
BLCA_321	GO_ANGIOGENESIS_INVOLVED_IN_WOUND_HEALING	0.00524969
BLCA_321	GO_B_CELL_PROLIFERATION	0.00617854
BLCA_321	GO_HEMATOPOIETIC_STEM_CELL_PROLIFERATION	0.00560518
BLCA_321	GO_MESENCHYMAL_CELL_PROLIFERATION	0.00575667
BLCA_321	GO_NEGATIVE_REGULATION_OF_STEM_CELL_PROLIFERATION	0.00177045
BLCA_321	GO_REGULATION_OF_MYOBLAST_PROLIFERATION	0.00239519
BLCA_321	GO_REGULATION_OF_STEM_CELL_PROLIFERATION	0.000899239
BLCA_323	GO_INSULIN_LIKE_GROWTH_FACTOR_RECEPTOR_BINDING	0.00408001
BLCA_333	GO_RESPONSE_TO_NERVE_GROWTH_FACTOR	0.00574398
BLCA_334	GO_EPITHELIAL_CELL_PROLIFERATION	4.44301e-06
BLCA_334	GO_FIBROBLAST_GROWTH_FACTOR_BINDING	0.000307399
BLCA_334	GO_FIBROBLAST_GROWTH_FACTOR_RECEPTOR_BINDING	0.000583718
BLCA_334	GO_GROWTH_FACTOR_ACTIVITY	0.0047671
BLCA_334	GO_INSULIN_LIKE_GROWTH_FACTOR_BINDING	8.76378e-06
BLCA_334	GO_KERATINOCYTE_PROLIFERATION	0.000176946
BLCA_334	GO_MAMMARY_GLAND_EPITHELIAL_CELL_PROLIFERATION	2.74285e-07
BLCA_334	GO_MUSCLE_CELL_PROLIFERATION	0.00922607
BLCA_334	GO_NEGATIVE_REGULATION_OF_B_CELL_PROLIFERATION	5.92735e-05
BLCA_334	GO_NEGATIVE_REGULATION_OF_CELL_PROLIFERATION	0.00041596
BLCA_334	GO_NEGATIVE_REGULATION_OF_GLIAL_CELL_PROLIFERATION	8.62926e-05
BLCA_334	GO_NEGATIVE_REGULATION_OF_NEURAL_PRECURSOR_CELL_PROLIFERATION	0.00354009
BLCA_334	GO_NEGATIVE_REGULATION_OF_SMOOTH_MUSCLE_CELL_PROLIFERATION	1.56637e-05
BLCA_334	GO_NEUROBLAST_PROLIFERATION	7.03221e-05
BLCA_334	GO_POSITIVE_REGULATION_OF_CARDIAC_MUSCLE_CELL_PROLIFERATION	4.4278e-05
BLCA_334	GO_POSITIVE_REGULATION_OF_INSULIN_LIKE_GROWTH_FACTOR_RECEPTOR_SIGNALING_PATHWAY	1.22113e-05
BLCA_334	GO_REGULATION_OF_ACTIVATED_T_CELL_PROLIFERATION	0.00882146
BLCA_334	GO_REGULATION_OF_CARDIAC_MUSCLE_CELL_PROLIFERATION	1.12867e-05
BLCA_334	GO_REGULATION_OF_CELL_PROLIFERATION	0.0028075
BLCA_334	GO_REGULATION_OF_CELL_PROLIFERATION_INVOLVED_IN_HEART_MORPHOGENESIS	1.00735e-05
BLCA_334	GO_REGULATION_OF_GLIAL_CELL_PROLIFERATION	4.98768e-05
BLCA_334	GO_REGULATION_OF_INSULIN_LIKE_GROWTH_FACTOR_RECEPTOR_SIGNALING_PATHWAY	1.12311e-05
BLCA_334	GO_REGULATION_OF_MAMMARY_GLAND_EPITHELIAL_CELL_PROLIFERATION	1.37983e-07
BLCA_334	GO_REGULATION_OF_NEURAL_PRECURSOR_CELL_PROLIFERATION	0.00588116
BLCA_334	GO_REGULATION_OF_PLATELET_DERIVED_GROWTH_FACTOR_RECEPTOR_SIGNALING_PATHWAY	0.000267442
BLCA_334	GO_REGULATION_OF_SMOOTH_MUSCLE_CELL_PROLIFERATION	2.36723e-05
BLCA_334	GO_RESPONSE_TO_NERVE_GROWTH_FACTOR	0.00146294
BLCA_334	GO_VASCULAR_ENDOTHELIAL_GROWTH_FACTOR_SIGNALING_PATHWAY	0.0007672
BLCA_335	GO_ANGIOGENESIS	0.0043318
BLCA_335	GO_ANGIOGENESIS_INVOLVED_IN_WOUND_HEALING	0.0094885
BLCA_335	GO_HEMATOPOIETIC_STEM_CELL_PROLIFERATION	0.00174914
BLCA_335	GO_NEGATIVE_REGULATION_OF_ENDOTHELIAL_CELL_PROLIFERATION	0.00956544
BLCA_335	GO_NEGATIVE_REGULATION_OF_LOCOMOTION	0.00883208
BLCA_335	GO_NEGATIVE_REGULATION_OF_SPROUTING_ANGIOGENESIS	0.00018783
BLCA_335	GO_NEGATIVE_REGULATION_OF_STEM_CELL_PROLIFERATION	0.00295676
BLCA_335	GO_REGULATION_OF_CELL_MIGRATION_INVOLVED_IN_SPROUTING_ANGIOGENESIS	0.0014299
BLCA_335	GO_REGULATION_OF_ENDOTHELIAL_CELL_PROLIFERATION	0.0088802
BLCA_335	GO_REGULATION_OF_SPROUTING_ANGIOGENESIS	0.000816182
BLCA_335	GO_REGULATION_OF_STEM_CELL_PROLIFERATION	0.00308145
BLCA_335	GO_TRANSFORMING_GROWTH_FACTOR_BETA_RECEPTOR_SIGNALING_PATHWAY	0.00815966
BLCA_411	GO_ANGIOGENESIS_INVOLVED_IN_WOUND_HEALING	0.00602567
BLCA_411	GO_B_CELL_PROLIFERATION	0.00945308
BLCA_411	GO_MESENCHYMAL_CELL_PROLIFERATION	0.00428055
BLCA_411	GO_NEGATIVE_REGULATION_OF_STEM_CELL_PROLIFERATION	0.00955459
BLCA_411	GO_REGULATION_OF_MYOBLAST_PROLIFERATION	0.00350052
BLCA_411	GO_REGULATION_OF_STEM_CELL_PROLIFERATION	0.0061284
BLCA_412	GO_FIBROBLAST_GROWTH_FACTOR_RECEPTOR_SIGNALING_PATHWAY	0.000610648
BLCA_412	GO_NEGATIVE_REGULATION_OF_CELLULAR_RESPONSE_TO_GROWTH_FACTOR_STIMULUS	0.000813603
BLCA_412	GO_NEGATIVE_REGULATION_OF_CELLULAR_RESPONSE_TO_TRANSFORMING_GROWTH_FACTOR_BETA_STIMULUS	0.000580961
BLCA_412	GO_NEGATIVE_REGULATION_OF_STEM_CELL_PROLIFERATION	0.00332852
BLCA_412	GO_NEGATIVE_REGULATION_OF_TRANSFORMING_GROWTH_FACTOR_BETA_RECEPTOR_SIGNALING_PATHWAY	0.000580961
BLCA_412	GO_NEUROBLAST_PROLIFERATION	0.00909058
BLCA_412	GO_PLATELET_DERIVED_GROWTH_FACTOR_RECEPTOR_SIGNALING_PATHWAY	0.000259035
BLCA_412	GO_REGULATION_OF_CELLULAR_RESPONSE_TO_GROWTH_FACTOR_STIMULUS	0.00201928
BLCA_412	GO_REGULATION_OF_CELLULAR_RESPONSE_TO_TRANSFORMING_GROWTH_FACTOR_BETA_STIMULUS	0.00167773
BLCA_412	GO_REGULATION_OF_STEM_CELL_PROLIFERATION	0.00445019
BLCA_412	GO_REGULATION_OF_TRANSFORMING_GROWTH_FACTOR_BETA_RECEPTOR_SIGNALING_PATHWAY	0.00167773
BLCA_412	GO_TRANSFORMING_GROWTH_FACTOR_BETA_RECEPTOR_BINDING	0.00649851
BLCA_412	GO_VASCULAR_ENDOTHELIAL_GROWTH_FACTOR_SIGNALING_PATHWAY	0.000675654
BLCA_413	GO_EPITHELIAL_CELL_PROLIFERATION	9.53253e-07
BLCA_413	GO_FIBROBLAST_GROWTH_FACTOR_BINDING	0.00264345
BLCA_413	GO_FIBROBLAST_GROWTH_FACTOR_RECEPTOR_BINDING	9.30404e-06
BLCA_413	GO_FIBROBLAST_GROWTH_FACTOR_RECEPTOR_SIGNALING_PATHWAY	0.00347772
BLCA_413	GO_GROWTH_FACTOR_ACTIVITY	0.00152132
BLCA_413	GO_INSULIN_LIKE_GROWTH_FACTOR_BINDING	1.4272e-06
BLCA_413	GO_INSULIN_LIKE_GROWTH_FACTOR_RECEPTOR_BINDING	0.00394431
BLCA_413	GO_KERATINOCYTE_PROLIFERATION	8.07669e-05
BLCA_413	GO_MAMMARY_GLAND_EPITHELIAL_CELL_PROLIFERATION	1.43053e-07
BLCA_413	GO_MUSCLE_CELL_PROLIFERATION	0.00138627
BLCA_413	GO_NEGATIVE_REGULATION_OF_B_CELL_PROLIFERATION	2.61115e-06
BLCA_413	GO_NEGATIVE_REGULATION_OF_CELLULAR_RESPONSE_TO_GROWTH_FACTOR_STIMULUS	0.00609925
BLCA_413	GO_NEGATIVE_REGULATION_OF_CELLULAR_RESPONSE_TO_TRANSFORMING_GROWTH_FACTOR_BETA_STIMULUS	0.00866019
BLCA_413	GO_NEGATIVE_REGULATION_OF_CELL_PROLIFERATION	0.000430065
BLCA_413	GO_NEGATIVE_REGULATION_OF_GLIAL_CELL_PROLIFERATION	1.91297e-06
BLCA_413	GO_NEGATIVE_REGULATION_OF_NEURAL_PRECURSOR_CELL_PROLIFERATION	2.57782e-05
BLCA_413	GO_NEGATIVE_REGULATION_OF_SMOOTH_MUSCLE_CELL_PROLIFERATION	2.68287e-06
BLCA_413	GO_NEGATIVE_REGULATION_OF_TRANSFORMING_GROWTH_FACTOR_BETA_RECEPTOR_SIGNALING_PATHWAY	0.00866019
BLCA_413	GO_NEUROBLAST_PROLIFERATION	3.59646e-05
BLCA_413	GO_POSITIVE_REGULATION_OF_ACTIVATED_T_CELL_PROLIFERATION	0.00177544
BLCA_413	GO_POSITIVE_REGULATION_OF_CARDIAC_MUSCLE_CELL_PROLIFERATION	0.00209761
BLCA_413	GO_POSITIVE_REGULATION_OF_CELL_PROLIFERATION	0.00341861
BLCA_413	GO_POSITIVE_REGULATION_OF_INSULIN_LIKE_GROWTH_FACTOR_RECEPTOR_SIGNALING_PATHWAY	2.04316e-06
BLCA_413	GO_POSITIVE_REGULATION_OF_T_CELL_PROLIFERATION	0.00443652
BLCA_413	GO_REGULATION_OF_ACTIVATED_T_CELL_PROLIFERATION	0.00162586
BLCA_413	GO_REGULATION_OF_CARDIAC_MUSCLE_CELL_PROLIFERATION	5.71323e-05
BLCA_413	GO_REGULATION_OF_CELLULAR_RESPONSE_TO_GROWTH_FACTOR_STIMULUS	0.00806303
BLCA_413	GO_REGULATION_OF_CELL_PROLIFERATION	0.000504095
BLCA_413	GO_REGULATION_OF_CELL_PROLIFERATION_INVOLVED_IN_HEART_MORPHOGENESIS	7.11644e-06
BLCA_413	GO_REGULATION_OF_GLIAL_CELL_PROLIFERATION	2.78063e-07
BLCA_413	GO_REGULATION_OF_INSULIN_LIKE_GROWTH_FACTOR_RECEPTOR_SIGNALING_PATHWAY	1.64849e-06
BLCA_413	GO_REGULATION_OF_MAMMARY_GLAND_EPITHELIAL_CELL_PROLIFERATION	1.98093e-08
BLCA_413	GO_REGULATION_OF_NEURAL_PRECURSOR_CELL_PROLIFERATION	5.15476e-05
BLCA_413	GO_REGULATION_OF_PLATELET_DERIVED_GROWTH_FACTOR_RECEPTOR_SIGNALING_PATHWAY	0.00372338
BLCA_413	GO_REGULATION_OF_SMOOTH_MUSCLE_CELL_PROLIFERATION	3.43747e-06
BLCA_413	GO_REGULATION_OF_T_CELL_PROLIFERATION	0.00429058
BLCA_413	GO_STRIATED_MUSCLE_CELL_PROLIFERATION	0.00255188
BLCA_413	GO_VASCULAR_ENDOTHELIAL_GROWTH_FACTOR_SIGNALING_PATHWAY	0.000324592
BLCA_421	GO_NEGATIVE_REGULATION_OF_STEM_CELL_PROLIFERATION	0.000713362
BLCA_421	GO_REGULATION_OF_STEM_CELL_PROLIFERATION	0.000356222
BLCA_423	GO_EPITHELIAL_CELL_PROLIFERATION	4.70255e-05
BLCA_423	GO_FIBROBLAST_GROWTH_FACTOR_BINDING	0.000237609
BLCA_423	GO_FIBROBLAST_GROWTH_FACTOR_RECEPTOR_BINDING	0.00111821
BLCA_423	GO_GROWTH_FACTOR_ACTIVITY	0.0053233
BLCA_423	GO_INSULIN_LIKE_GROWTH_FACTOR_BINDING	6.93206e-05
BLCA_423	GO_KERATINOCYTE_PROLIFERATION	4.52141e-05
BLCA_423	GO_LEUKOCYTE_PROLIFERATION	0.00807604
BLCA_423	GO_MAMMARY_GLAND_EPITHELIAL_CELL_PROLIFERATION	8.27186e-06
BLCA_423	GO_NEGATIVE_REGULATION_OF_B_CELL_PROLIFERATION	7.92438e-06
BLCA_423	GO_NEGATIVE_REGULATION_OF_CELL_PROLIFERATION	0.00132224
BLCA_423	GO_NEGATIVE_REGULATION_OF_GLIAL_CELL_PROLIFERATION	8.47113e-06
BLCA_423	GO_NEGATIVE_REGULATION_OF_LEUKOCYTE_PROLIFERATION	0.00835991
BLCA_423	GO_NEGATIVE_REGULATION_OF_NEURAL_PRECURSOR_CELL_PROLIFERATION	0.00173912
BLCA_423	GO_NEGATIVE_REGULATION_OF_SMOOTH_MUSCLE_CELL_PROLIFERATION	0.000126185
BLCA_423	GO_NEUROBLAST_PROLIFERATION	0.000457967
BLCA_423	GO_POSITIVE_REGULATION_OF_CARDIAC_MUSCLE_CELL_PROLIFERATION	0.000933362
BLCA_423	GO_POSITIVE_REGULATION_OF_INSULIN_LIKE_GROWTH_FACTOR_RECEPTOR_SIGNALING_PATHWAY	0.00011862
BLCA_423	GO_REGULATION_OF_ACTIVATED_T_CELL_PROLIFERATION	0.00635313
BLCA_423	GO_REGULATION_OF_CARDIAC_MUSCLE_CELL_PROLIFERATION	0.000185637
BLCA_423	GO_REGULATION_OF_CELL_PROLIFERATION	0.00444466
BLCA_423	GO_REGULATION_OF_CELL_PROLIFERATION_INVOLVED_IN_HEART_MORPHOGENESIS	1.39649e-06
BLCA_423	GO_REGULATION_OF_GLIAL_CELL_PROLIFERATION	3.20171e-06
BLCA_423	GO_REGULATION_OF_INSULIN_LIKE_GROWTH_FACTOR_RECEPTOR_SIGNALING_PATHWAY	9.31912e-05
BLCA_423	GO_REGULATION_OF_MAMMARY_GLAND_EPITHELIAL_CELL_PROLIFERATION	4.07965e-06
BLCA_423	GO_REGULATION_OF_NEURAL_PRECURSOR_CELL_PROLIFERATION	0.00725341
BLCA_423	GO_REGULATION_OF_SMOOTH_MUSCLE_CELL_PROLIFERATION	0.000206807
BLCA_423	GO_RESPONSE_TO_NERVE_GROWTH_FACTOR	0.00648633
BLCA_423	GO_VASCULAR_ENDOTHELIAL_GROWTH_FACTOR_SIGNALING_PATHWAY	0.000981088
BLCA_424	GO_RESPONSE_TO_NERVE_GROWTH_FACTOR	0.00574398
BLCA_513	GO_ANGIOGENESIS	4.34965e-09
BLCA_513	GO_ANGIOGENESIS_INVOLVED_IN_WOUND_HEALING	0.00183666
BLCA_513	GO_CELLULAR_RESPONSE_TO_EPIDERMAL_GROWTH_FACTOR_STIMULUS	1.37094e-05
BLCA_513	GO_CELLULAR_RESPONSE_TO_HEPATOCYTE_GROWTH_FACTOR_STIMULUS	0.000222225
BLCA_513	GO_CELLULAR_RESPONSE_TO_VASCULAR_ENDOTHELIAL_GROWTH_FACTOR_STIMULUS	2.47296e-07
BLCA_513	GO_CELL_MIGRATION_INVOLVED_IN_SPROUTING_ANGIOGENESIS	0.00671973
BLCA_513	GO_CELL_PROLIFERATION_IN_FOREBRAIN	2.46671e-06
BLCA_513	GO_ENDOTHELIAL_CELL_PROLIFERATION	0.00544214
BLCA_513	GO_EPIDERMAL_GROWTH_FACTOR_RECEPTOR_BINDING	3.70258e-05
BLCA_513	GO_GROWTH_FACTOR_BINDING	5.89664e-08
BLCA_513	GO_HEMATOPOIETIC_STEM_CELL_PROLIFERATION	5.9451e-09
BLCA_513	GO_INNER_CELL_MASS_CELL_PROLIFERATION	0.00479074
BLCA_513	GO_LOCOMOTION	2.36164e-08
BLCA_513	GO_MESENCHYMAL_CELL_PROLIFERATION	0.000489842
BLCA_513	GO_NEGATIVE_REGULATION_OF_ENDOTHELIAL_CELL_PROLIFERATION	2.76492e-06
BLCA_513	GO_NEGATIVE_REGULATION_OF_EPITHELIAL_CELL_PROLIFERATION	4.30237e-06
BLCA_513	GO_NEGATIVE_REGULATION_OF_FIBROBLAST_GROWTH_FACTOR_RECEPTOR_SIGNALING_PATHWAY	1.72444e-08
BLCA_513	GO_NEGATIVE_REGULATION_OF_LOCOMOTION	4.34409e-08
BLCA_513	GO_NEGATIVE_REGULATION_OF_SPROUTING_ANGIOGENESIS	0.000217005
BLCA_513	GO_NEGATIVE_REGULATION_OF_STEM_CELL_PROLIFERATION	0.000451668
BLCA_513	GO_PLATELET_DERIVED_GROWTH_FACTOR_BINDING	4.00863e-08
BLCA_513	GO_POSITIVE_REGULATION_OF_CELLULAR_RESPONSE_TO_TRANSFORMING_GROWTH_FACTOR_BETA_STIMULUS	3.56661e-07
BLCA_513	GO_POSITIVE_REGULATION_OF_LOCOMOTION	1.35947e-08
BLCA_513	GO_POSITIVE_REGULATION_OF_TRANSFORMING_GROWTH_FACTOR_BETA_PRODUCTION	5.25406e-10
BLCA_513	GO_POSITIVE_REGULATION_OF_TRANSFORMING_GROWTH_FACTOR_BETA_RECEPTOR_SIGNALING_PATHWAY	3.56661e-07
BLCA_513	GO_POSITIVE_REGULATION_OF_VASCULAR_ENDOTHELIAL_GROWTH_FACTOR_PRODUCTION	0.00546185
BLCA_513	GO_REGULATION_OF_CELL_PROLIFERATION_INVOLVED_IN_KIDNEY_DEVELOPMENT	6.65455e-10
BLCA_513	GO_REGULATION_OF_ENDOTHELIAL_CELL_PROLIFERATION	2.40075e-06
BLCA_513	GO_REGULATION_OF_EPITHELIAL_CELL_PROLIFERATION	3.33873e-05
BLCA_513	GO_REGULATION_OF_FIBROBLAST_GROWTH_FACTOR_RECEPTOR_SIGNALING_PATHWAY	3.60863e-08
BLCA_513	GO_REGULATION_OF_HEPATOCYTE_PROLIFERATION	5.35385e-07
BLCA_513	GO_REGULATION_OF_SKELETAL_MUSCLE_CELL_PROLIFERATION	0.00872179
BLCA_513	GO_REGULATION_OF_STEM_CELL_PROLIFERATION	0.000520412
BLCA_513	GO_REGULATION_OF_TRANSFORMING_GROWTH_FACTOR_BETA_PRODUCTION	1.66291e-09
BLCA_513	GO_REGULATION_OF_VASCULAR_ENDOTHELIAL_GROWTH_FACTOR_PRODUCTION	0.00507936
BLCA_513	GO_RESPONSE_TO_EPIDERMAL_GROWTH_FACTOR	1.54048e-05
BLCA_513	GO_RESPONSE_TO_FIBROBLAST_GROWTH_FACTOR	3.96681e-08
BLCA_513	GO_RESPONSE_TO_GROWTH_FACTOR	4.18997e-06
BLCA_513	GO_RESPONSE_TO_HEPATOCYTE_GROWTH_FACTOR	0.000222225
BLCA_513	GO_RESPONSE_TO_PLATELET_DERIVED_GROWTH_FACTOR	4.27625e-10
BLCA_513	GO_RESPONSE_TO_TRANSFORMING_GROWTH_FACTOR_BETA	6.01158e-09
BLCA_513	GO_SPROUTING_ANGIOGENESIS	1.22938e-06
BLCA_513	GO_TRANSFORMING_GROWTH_FACTOR_BETA_BINDING	7.32499e-08
BLCA_513	GO_TRANSFORMING_GROWTH_FACTOR_BETA_RECEPTOR_SIGNALING_PATHWAY	7.20043e-08
BLCA_513	GO_VASCULAR_ENDOTHELIAL_GROWTH_FACTOR_RECEPTOR_SIGNALING_PATHWAY	0.000236912
BLCA_513	KEGG_TGF_BETA_SIGNALING_PATHWAY	2.514e-07
BLCA_516	GO_RESPONSE_TO_NERVE_GROWTH_FACTOR	0.00574398
BLCA_519	GO_ANGIOGENESIS_INVOLVED_IN_WOUND_HEALING	0.00549418
BLCA_519	GO_NEGATIVE_REGULATION_OF_ENDOTHELIAL_CELL_PROLIFERATION	0.00807622
BLCA_519	GO_NEGATIVE_REGULATION_OF_SPROUTING_ANGIOGENESIS	0.00192083
BLCA_519	GO_NEGATIVE_REGULATION_OF_STEM_CELL_PROLIFERATION	0.000511846
BLCA_519	GO_POSITIVE_REGULATION_OF_B_CELL_PROLIFERATION	0.00255203
BLCA_519	GO_REGULATION_OF_B_CELL_PROLIFERATION	0.00283754
BLCA_519	GO_REGULATION_OF_CELL_MIGRATION_INVOLVED_IN_SPROUTING_ANGIOGENESIS	0.00701778
BLCA_519	GO_REGULATION_OF_ENDOTHELIAL_CELL_PROLIFERATION	0.00862311
BLCA_519	GO_REGULATION_OF_SPROUTING_ANGIOGENESIS	0.00327071
BLCA_519	GO_REGULATION_OF_STEM_CELL_PROLIFERATION	0.000611407
BLCA_531	GO_FIBROBLAST_GROWTH_FACTOR_RECEPTOR_SIGNALING_PATHWAY	0.000610648
BLCA_531	GO_NEGATIVE_REGULATION_OF_CELLULAR_RESPONSE_TO_GROWTH_FACTOR_STIMULUS	0.000813603
BLCA_531	GO_NEGATIVE_REGULATION_OF_CELLULAR_RESPONSE_TO_TRANSFORMING_GROWTH_FACTOR_BETA_STIMULUS	0.000580961
BLCA_531	GO_NEGATIVE_REGULATION_OF_STEM_CELL_PROLIFERATION	0.00332852
BLCA_531	GO_NEGATIVE_REGULATION_OF_TRANSFORMING_GROWTH_FACTOR_BETA_RECEPTOR_SIGNALING_PATHWAY	0.000580961
BLCA_531	GO_NEUROBLAST_PROLIFERATION	0.00909058
BLCA_531	GO_PLATELET_DERIVED_GROWTH_FACTOR_RECEPTOR_SIGNALING_PATHWAY	0.000259035
BLCA_531	GO_REGULATION_OF_CELLULAR_RESPONSE_TO_GROWTH_FACTOR_STIMULUS	0.00201928
BLCA_531	GO_REGULATION_OF_CELLULAR_RESPONSE_TO_TRANSFORMING_GROWTH_FACTOR_BETA_STIMULUS	0.00167773
BLCA_531	GO_REGULATION_OF_STEM_CELL_PROLIFERATION	0.00445019
BLCA_531	GO_REGULATION_OF_TRANSFORMING_GROWTH_FACTOR_BETA_RECEPTOR_SIGNALING_PATHWAY	0.00167773
BLCA_531	GO_TRANSFORMING_GROWTH_FACTOR_BETA_RECEPTOR_BINDING	0.00649851
BLCA_531	GO_VASCULAR_ENDOTHELIAL_GROWTH_FACTOR_SIGNALING_PATHWAY	0.000675654
BLCA_532	GO_EPITHELIAL_CELL_PROLIFERATION	2.02239e-05
BLCA_532	GO_FIBROBLAST_GROWTH_FACTOR_BINDING	0.000358097
BLCA_532	GO_FIBROBLAST_GROWTH_FACTOR_RECEPTOR_BINDING	0.000817134
BLCA_532	GO_GROWTH_FACTOR_ACTIVITY	0.00336755
BLCA_532	GO_INSULIN_LIKE_GROWTH_FACTOR_BINDING	2.38801e-05
BLCA_532	GO_INSULIN_LIKE_GROWTH_FACTOR_RECEPTOR_BINDING	0.00756695
BLCA_532	GO_KERATINOCYTE_PROLIFERATION	0.000139763
BLCA_532	GO_MAMMARY_GLAND_EPITHELIAL_CELL_PROLIFERATION	1.21796e-05
BLCA_532	GO_NEGATIVE_REGULATION_OF_B_CELL_PROLIFERATION	5.43823e-06
BLCA_532	GO_NEGATIVE_REGULATION_OF_CELL_PROLIFERATION	0.00162941
BLCA_532	GO_NEGATIVE_REGULATION_OF_GLIAL_CELL_PROLIFERATION	2.48776e-06
BLCA_532	GO_NEGATIVE_REGULATION_OF_LEUKOCYTE_PROLIFERATION	0.00558066
BLCA_532	GO_NEGATIVE_REGULATION_OF_NEURAL_PRECURSOR_CELL_PROLIFERATION	0.000481835
BLCA_532	GO_NEGATIVE_REGULATION_OF_SMOOTH_MUSCLE_CELL_PROLIFERATION	3.91518e-05
BLCA_532	GO_NEGATIVE_REGULATION_OF_STEM_CELL_PROLIFERATION	0.00952136
BLCA_532	GO_NEUROBLAST_PROLIFERATION	0.000285712
BLCA_532	GO_POSITIVE_REGULATION_OF_ACTIVATED_T_CELL_PROLIFERATION	0.0076325
BLCA_532	GO_POSITIVE_REGULATION_OF_CARDIAC_MUSCLE_CELL_PROLIFERATION	0.000507519
BLCA_532	GO_POSITIVE_REGULATION_OF_INSULIN_LIKE_GROWTH_FACTOR_RECEPTOR_SIGNALING_PATHWAY	3.76449e-05
BLCA_532	GO_REGULATION_OF_ACTIVATED_T_CELL_PROLIFERATION	0.00383947
BLCA_532	GO_REGULATION_OF_CARDIAC_MUSCLE_CELL_PROLIFERATION	0.000338231
BLCA_532	GO_REGULATION_OF_CELL_PROLIFERATION	0.00609968
BLCA_532	GO_REGULATION_OF_CELL_PROLIFERATION_INVOLVED_IN_HEART_MORPHOGENESIS	1.10229e-06
BLCA_532	GO_REGULATION_OF_GLIAL_CELL_PROLIFERATION	7.32011e-07
BLCA_532	GO_REGULATION_OF_INSULIN_LIKE_GROWTH_FACTOR_RECEPTOR_SIGNALING_PATHWAY	3.21485e-05
BLCA_532	GO_REGULATION_OF_MAMMARY_GLAND_EPITHELIAL_CELL_PROLIFERATION	5.36039e-06
BLCA_532	GO_REGULATION_OF_NEURAL_PRECURSOR_CELL_PROLIFERATION	0.0026188
BLCA_532	GO_REGULATION_OF_SMOOTH_MUSCLE_CELL_PROLIFERATION	7.25316e-05
BLCA_532	GO_RESPONSE_TO_NERVE_GROWTH_FACTOR	0.00897636
BLCA_532	GO_VASCULAR_ENDOTHELIAL_GROWTH_FACTOR_SIGNALING_PATHWAY	0.00120678
BLCA_533	GO_FIBROBLAST_GROWTH_FACTOR_BINDING	5.18383e-05
BLCA_533	GO_FIBROBLAST_GROWTH_FACTOR_RECEPTOR_BINDING	0.00251135
BLCA_533	GO_LEUKOCYTE_PROLIFERATION	0.000427911
BLCA_533	GO_NEGATIVE_REGULATION_OF_B_CELL_PROLIFERATION	0.000403231
BLCA_533	GO_NEGATIVE_REGULATION_OF_GLIAL_CELL_PROLIFERATION	8.15991e-05
BLCA_533	GO_NEGATIVE_REGULATION_OF_NEURAL_PRECURSOR_CELL_PROLIFERATION	1.7081e-05
BLCA_533	GO_NEUROBLAST_PROLIFERATION	0.00198408
BLCA_533	GO_POSITIVE_REGULATION_OF_ACTIVATED_T_CELL_PROLIFERATION	0.00756785
BLCA_533	GO_REGULATION_OF_ACTIVATED_T_CELL_PROLIFERATION	0.00669768
BLCA_533	GO_REGULATION_OF_CELL_PROLIFERATION_INVOLVED_IN_HEART_MORPHOGENESIS	0.000119867
BLCA_533	GO_REGULATION_OF_GLIAL_CELL_PROLIFERATION	0.000429321
BLCA_533	GO_REGULATION_OF_NEURAL_PRECURSOR_CELL_PROLIFERATION	6.22887e-05
BLCA_533	GO_RESPONSE_TO_NERVE_GROWTH_FACTOR	0.00408115
BLCA_533	GO_TRANSFORMING_GROWTH_FACTOR_BETA_RECEPTOR_BINDING	0.00222085
BLCA_533	GO_T_CELL_PROLIFERATION	0.000826725
BLCA_533	GO_VASCULAR_ENDOTHELIAL_GROWTH_FACTOR_SIGNALING_PATHWAY	0.00547131
BLCA_541	GO_ANGIOGENESIS_INVOLVED_IN_WOUND_HEALING	0.00424184
BLCA_541	GO_MESENCHYMAL_CELL_PROLIFERATION	0.00799133
BLCA_541	GO_NEGATIVE_REGULATION_OF_STEM_CELL_PROLIFERATION	0.0051583
BLCA_541	GO_POSITIVE_REGULATION_OF_B_CELL_PROLIFERATION	0.00820698
BLCA_541	GO_REGULATION_OF_B_CELL_PROLIFERATION	0.00924191
BLCA_541	GO_REGULATION_OF_MYOBLAST_PROLIFERATION	0.0091695
BLCA_541	GO_REGULATION_OF_STEM_CELL_PROLIFERATION	0.00299795
BLCA_542	GO_FIBROBLAST_GROWTH_FACTOR_RECEPTOR_SIGNALING_PATHWAY	0.000610648
BLCA_542	GO_NEGATIVE_REGULATION_OF_CELLULAR_RESPONSE_TO_GROWTH_FACTOR_STIMULUS	0.000813603
BLCA_542	GO_NEGATIVE_REGULATION_OF_CELLULAR_RESPONSE_TO_TRANSFORMING_GROWTH_FACTOR_BETA_STIMULUS	0.000580961
BLCA_542	GO_NEGATIVE_REGULATION_OF_STEM_CELL_PROLIFERATION	0.00332852
BLCA_542	GO_NEGATIVE_REGULATION_OF_TRANSFORMING_GROWTH_FACTOR_BETA_RECEPTOR_SIGNALING_PATHWAY	0.000580961
BLCA_542	GO_NEUROBLAST_PROLIFERATION	0.00909058
BLCA_542	GO_PLATELET_DERIVED_GROWTH_FACTOR_RECEPTOR_SIGNALING_PATHWAY	0.000259035
BLCA_542	GO_REGULATION_OF_CELLULAR_RESPONSE_TO_GROWTH_FACTOR_STIMULUS	0.00201928
BLCA_542	GO_REGULATION_OF_CELLULAR_RESPONSE_TO_TRANSFORMING_GROWTH_FACTOR_BETA_STIMULUS	0.00167773
BLCA_542	GO_REGULATION_OF_STEM_CELL_PROLIFERATION	0.00445019
BLCA_542	GO_REGULATION_OF_TRANSFORMING_GROWTH_FACTOR_BETA_RECEPTOR_SIGNALING_PATHWAY	0.00167773
BLCA_542	GO_TRANSFORMING_GROWTH_FACTOR_BETA_RECEPTOR_BINDING	0.00649851
BLCA_542	GO_VASCULAR_ENDOTHELIAL_GROWTH_FACTOR_SIGNALING_PATHWAY	0.000675654
BLCA_544	GO_INSULIN_LIKE_GROWTH_FACTOR_RECEPTOR_BINDING	0.00408001
BLCA_551	GO_EPIDERMAL_GROWTH_FACTOR_RECEPTOR_BINDING	0.00452957
BLCA_551	GO_PLATELET_DERIVED_GROWTH_FACTOR_RECEPTOR_BINDING	0.00771403
BLCA_613	GO_ANGIOGENESIS	4.34965e-09
BLCA_613	GO_ANGIOGENESIS_INVOLVED_IN_WOUND_HEALING	0.00183666
BLCA_613	GO_CELLULAR_RESPONSE_TO_EPIDERMAL_GROWTH_FACTOR_STIMULUS	1.37094e-05
BLCA_613	GO_CELLULAR_RESPONSE_TO_HEPATOCYTE_GROWTH_FACTOR_STIMULUS	0.000222225
BLCA_613	GO_CELLULAR_RESPONSE_TO_VASCULAR_ENDOTHELIAL_GROWTH_FACTOR_STIMULUS	2.47296e-07
BLCA_613	GO_CELL_MIGRATION_INVOLVED_IN_SPROUTING_ANGIOGENESIS	0.00671973
BLCA_613	GO_CELL_PROLIFERATION_IN_FOREBRAIN	2.46671e-06
BLCA_613	GO_ENDOTHELIAL_CELL_PROLIFERATION	0.00544214
BLCA_613	GO_EPIDERMAL_GROWTH_FACTOR_RECEPTOR_BINDING	3.70258e-05
BLCA_613	GO_GROWTH_FACTOR_BINDING	5.89664e-08
BLCA_613	GO_HEMATOPOIETIC_STEM_CELL_PROLIFERATION	5.9451e-09
BLCA_613	GO_INNER_CELL_MASS_CELL_PROLIFERATION	0.00479074
BLCA_613	GO_LOCOMOTION	2.36164e-08
BLCA_613	GO_MESENCHYMAL_CELL_PROLIFERATION	0.000489842
BLCA_613	GO_NEGATIVE_REGULATION_OF_ENDOTHELIAL_CELL_PROLIFERATION	2.76492e-06
BLCA_613	GO_NEGATIVE_REGULATION_OF_EPITHELIAL_CELL_PROLIFERATION	4.30237e-06
BLCA_613	GO_NEGATIVE_REGULATION_OF_FIBROBLAST_GROWTH_FACTOR_RECEPTOR_SIGNALING_PATHWAY	1.72444e-08
BLCA_613	GO_NEGATIVE_REGULATION_OF_LOCOMOTION	4.34409e-08
BLCA_613	GO_NEGATIVE_REGULATION_OF_SPROUTING_ANGIOGENESIS	0.000217005
BLCA_613	GO_NEGATIVE_REGULATION_OF_STEM_CELL_PROLIFERATION	0.000451668
BLCA_613	GO_PLATELET_DERIVED_GROWTH_FACTOR_BINDING	4.00863e-08
BLCA_613	GO_POSITIVE_REGULATION_OF_CELLULAR_RESPONSE_TO_TRANSFORMING_GROWTH_FACTOR_BETA_STIMULUS	3.56661e-07
BLCA_613	GO_POSITIVE_REGULATION_OF_LOCOMOTION	1.35947e-08
BLCA_613	GO_POSITIVE_REGULATION_OF_TRANSFORMING_GROWTH_FACTOR_BETA_PRODUCTION	5.25406e-10
BLCA_613	GO_POSITIVE_REGULATION_OF_TRANSFORMING_GROWTH_FACTOR_BETA_RECEPTOR_SIGNALING_PATHWAY	3.56661e-07
BLCA_613	GO_POSITIVE_REGULATION_OF_VASCULAR_ENDOTHELIAL_GROWTH_FACTOR_PRODUCTION	0.00546185
BLCA_613	GO_REGULATION_OF_CELL_PROLIFERATION_INVOLVED_IN_KIDNEY_DEVELOPMENT	6.65455e-10
BLCA_613	GO_REGULATION_OF_ENDOTHELIAL_CELL_PROLIFERATION	2.40075e-06
BLCA_613	GO_REGULATION_OF_EPITHELIAL_CELL_PROLIFERATION	3.33873e-05
BLCA_613	GO_REGULATION_OF_FIBROBLAST_GROWTH_FACTOR_RECEPTOR_SIGNALING_PATHWAY	3.60863e-08
BLCA_613	GO_REGULATION_OF_HEPATOCYTE_PROLIFERATION	5.35385e-07
BLCA_613	GO_REGULATION_OF_SKELETAL_MUSCLE_CELL_PROLIFERATION	0.00872179
BLCA_613	GO_REGULATION_OF_STEM_CELL_PROLIFERATION	0.000520412
BLCA_613	GO_REGULATION_OF_TRANSFORMING_GROWTH_FACTOR_BETA_PRODUCTION	1.66291e-09
BLCA_613	GO_REGULATION_OF_VASCULAR_ENDOTHELIAL_GROWTH_FACTOR_PRODUCTION	0.00507936
BLCA_613	GO_RESPONSE_TO_EPIDERMAL_GROWTH_FACTOR	1.54048e-05
BLCA_613	GO_RESPONSE_TO_FIBROBLAST_GROWTH_FACTOR	3.96681e-08
BLCA_613	GO_RESPONSE_TO_GROWTH_FACTOR	4.18997e-06
BLCA_613	GO_RESPONSE_TO_HEPATOCYTE_GROWTH_FACTOR	0.000222225
BLCA_613	GO_RESPONSE_TO_PLATELET_DERIVED_GROWTH_FACTOR	4.27625e-10
BLCA_613	GO_RESPONSE_TO_TRANSFORMING_GROWTH_FACTOR_BETA	6.01158e-09
BLCA_613	GO_SPROUTING_ANGIOGENESIS	1.22938e-06
BLCA_613	GO_TRANSFORMING_GROWTH_FACTOR_BETA_BINDING	7.32499e-08
BLCA_613	GO_TRANSFORMING_GROWTH_FACTOR_BETA_RECEPTOR_SIGNALING_PATHWAY	7.20043e-08
BLCA_613	GO_VASCULAR_ENDOTHELIAL_GROWTH_FACTOR_RECEPTOR_SIGNALING_PATHWAY	0.000236912
BLCA_613	KEGG_TGF_BETA_SIGNALING_PATHWAY	2.514e-07
BLCA_616	GO_RESPONSE_TO_NERVE_GROWTH_FACTOR	0.00574398
BLCA_619	GO_ANGIOGENESIS_INVOLVED_IN_WOUND_HEALING	0.00549418
BLCA_619	GO_NEGATIVE_REGULATION_OF_ENDOTHELIAL_CELL_PROLIFERATION	0.00807622
BLCA_619	GO_NEGATIVE_REGULATION_OF_SPROUTING_ANGIOGENESIS	0.00192083
BLCA_619	GO_NEGATIVE_REGULATION_OF_STEM_CELL_PROLIFERATION	0.000511846
BLCA_619	GO_POSITIVE_REGULATION_OF_B_CELL_PROLIFERATION	0.00255203
BLCA_619	GO_REGULATION_OF_B_CELL_PROLIFERATION	0.00283754
BLCA_619	GO_REGULATION_OF_CELL_MIGRATION_INVOLVED_IN_SPROUTING_ANGIOGENESIS	0.00701778
BLCA_619	GO_REGULATION_OF_ENDOTHELIAL_CELL_PROLIFERATION	0.00862311
BLCA_619	GO_REGULATION_OF_SPROUTING_ANGIOGENESIS	0.00327071
BLCA_619	GO_REGULATION_OF_STEM_CELL_PROLIFERATION	0.000611407
BLCA_631	GO_EPIDERMAL_GROWTH_FACTOR_RECEPTOR_BINDING	0.00452957
BLCA_631	GO_PLATELET_DERIVED_GROWTH_FACTOR_RECEPTOR_BINDING	0.00771403
BLCA_634	GO_INSULIN_LIKE_GROWTH_FACTOR_RECEPTOR_BINDING	0.00408001
BLCA_641	GO_ANGIOGENESIS_INVOLVED_IN_WOUND_HEALING	0.0038522
BLCA_641	GO_NEGATIVE_REGULATION_OF_STEM_CELL_PROLIFERATION	0.000540446
BLCA_641	GO_REGULATION_OF_STEM_CELL_PROLIFERATION	0.000222236
BLCA_642	GO_FIBROBLAST_GROWTH_FACTOR_RECEPTOR_SIGNALING_PATHWAY	0.000610648
BLCA_642	GO_NEGATIVE_REGULATION_OF_CELLULAR_RESPONSE_TO_GROWTH_FACTOR_STIMULUS	0.000813603
BLCA_642	GO_NEGATIVE_REGULATION_OF_CELLULAR_RESPONSE_TO_TRANSFORMING_GROWTH_FACTOR_BETA_STIMULUS	0.000580961
BLCA_642	GO_NEGATIVE_REGULATION_OF_STEM_CELL_PROLIFERATION	0.00332852
BLCA_642	GO_NEGATIVE_REGULATION_OF_TRANSFORMING_GROWTH_FACTOR_BETA_RECEPTOR_SIGNALING_PATHWAY	0.000580961
BLCA_642	GO_NEUROBLAST_PROLIFERATION	0.00909058
BLCA_642	GO_PLATELET_DERIVED_GROWTH_FACTOR_RECEPTOR_SIGNALING_PATHWAY	0.000259035
BLCA_642	GO_REGULATION_OF_CELLULAR_RESPONSE_TO_GROWTH_FACTOR_STIMULUS	0.00201928
BLCA_642	GO_REGULATION_OF_CELLULAR_RESPONSE_TO_TRANSFORMING_GROWTH_FACTOR_BETA_STIMULUS	0.00167773
BLCA_642	GO_REGULATION_OF_STEM_CELL_PROLIFERATION	0.00445019
BLCA_642	GO_REGULATION_OF_TRANSFORMING_GROWTH_FACTOR_BETA_RECEPTOR_SIGNALING_PATHWAY	0.00167773
BLCA_642	GO_TRANSFORMING_GROWTH_FACTOR_BETA_RECEPTOR_BINDING	0.00649851
BLCA_642	GO_VASCULAR_ENDOTHELIAL_GROWTH_FACTOR_SIGNALING_PATHWAY	0.000675654
BLCA_646	GO_ANGIOGENESIS_INVOLVED_IN_WOUND_HEALING	0.00191156
BLCA_646	GO_CELL_MIGRATION_INVOLVED_IN_SPROUTING_ANGIOGENESIS	0.00938407
BLCA_646	GO_NEGATIVE_REGULATION_OF_ENDOTHELIAL_CELL_PROLIFERATION	0.00597926
BLCA_646	GO_NEGATIVE_REGULATION_OF_LOCOMOTION	0.00937206
BLCA_646	GO_NEGATIVE_REGULATION_OF_SPROUTING_ANGIOGENESIS	0.00138284
BLCA_646	GO_NEGATIVE_REGULATION_OF_STEM_CELL_PROLIFERATION	0.000148441
BLCA_646	GO_POSITIVE_REGULATION_OF_B_CELL_PROLIFERATION	0.00168123
BLCA_646	GO_REGULATION_OF_B_CELL_PROLIFERATION	0.00185144
BLCA_646	GO_REGULATION_OF_CELL_MIGRATION_INVOLVED_IN_SPROUTING_ANGIOGENESIS	0.0068569
BLCA_646	GO_REGULATION_OF_ENDOTHELIAL_CELL_PROLIFERATION	0.00620132
BLCA_646	GO_REGULATION_OF_HEPATOCYTE_PROLIFERATION	0.00945652
BLCA_646	GO_REGULATION_OF_SPROUTING_ANGIOGENESIS	0.00469685
BLCA_646	GO_REGULATION_OF_STEM_CELL_PROLIFERATION	0.000170979
BLCA_646	GO_TRANSFORMING_GROWTH_FACTOR_BETA_RECEPTOR_BINDING	0.00900578
BLCA_646	GO_TRANSFORMING_GROWTH_FACTOR_BETA_RECEPTOR_SIGNALING_PATHWAY	0.00840859
BLCA_661	GO_FIBROBLAST_GROWTH_FACTOR_RECEPTOR_SIGNALING_PATHWAY	0.000610648
BLCA_661	GO_NEGATIVE_REGULATION_OF_CELLULAR_RESPONSE_TO_GROWTH_FACTOR_STIMULUS	0.000813603
BLCA_661	GO_NEGATIVE_REGULATION_OF_CELLULAR_RESPONSE_TO_TRANSFORMING_GROWTH_FACTOR_BETA_STIMULUS	0.000580961
BLCA_661	GO_NEGATIVE_REGULATION_OF_STEM_CELL_PROLIFERATION	0.00332852
BLCA_661	GO_NEGATIVE_REGULATION_OF_TRANSFORMING_GROWTH_FACTOR_BETA_RECEPTOR_SIGNALING_PATHWAY	0.000580961
BLCA_661	GO_NEUROBLAST_PROLIFERATION	0.00909058
BLCA_661	GO_PLATELET_DERIVED_GROWTH_FACTOR_RECEPTOR_SIGNALING_PATHWAY	0.000259035
BLCA_661	GO_REGULATION_OF_CELLULAR_RESPONSE_TO_GROWTH_FACTOR_STIMULUS	0.00201928
BLCA_661	GO_REGULATION_OF_CELLULAR_RESPONSE_TO_TRANSFORMING_GROWTH_FACTOR_BETA_STIMULUS	0.00167773
BLCA_661	GO_REGULATION_OF_STEM_CELL_PROLIFERATION	0.00445019
BLCA_661	GO_REGULATION_OF_TRANSFORMING_GROWTH_FACTOR_BETA_RECEPTOR_SIGNALING_PATHWAY	0.00167773
BLCA_661	GO_TRANSFORMING_GROWTH_FACTOR_BETA_RECEPTOR_BINDING	0.00649851
BLCA_661	GO_VASCULAR_ENDOTHELIAL_GROWTH_FACTOR_SIGNALING_PATHWAY	0.000675654
BLCA_662	GO_EPITHELIAL_CELL_PROLIFERATION	4.70255e-05
BLCA_662	GO_FIBROBLAST_GROWTH_FACTOR_BINDING	0.000237609
BLCA_662	GO_FIBROBLAST_GROWTH_FACTOR_RECEPTOR_BINDING	0.00111821
BLCA_662	GO_GROWTH_FACTOR_ACTIVITY	0.0053233
BLCA_662	GO_INSULIN_LIKE_GROWTH_FACTOR_BINDING	6.93206e-05
BLCA_662	GO_KERATINOCYTE_PROLIFERATION	4.52141e-05
BLCA_662	GO_LEUKOCYTE_PROLIFERATION	0.00807604
BLCA_662	GO_MAMMARY_GLAND_EPITHELIAL_CELL_PROLIFERATION	8.27186e-06
BLCA_662	GO_NEGATIVE_REGULATION_OF_B_CELL_PROLIFERATION	7.92438e-06
BLCA_662	GO_NEGATIVE_REGULATION_OF_CELL_PROLIFERATION	0.00132224
BLCA_662	GO_NEGATIVE_REGULATION_OF_GLIAL_CELL_PROLIFERATION	8.47113e-06
BLCA_662	GO_NEGATIVE_REGULATION_OF_LEUKOCYTE_PROLIFERATION	0.00835991
BLCA_662	GO_NEGATIVE_REGULATION_OF_NEURAL_PRECURSOR_CELL_PROLIFERATION	0.00173912
BLCA_662	GO_NEGATIVE_REGULATION_OF_SMOOTH_MUSCLE_CELL_PROLIFERATION	0.000126185
BLCA_662	GO_NEUROBLAST_PROLIFERATION	0.000457967
BLCA_662	GO_POSITIVE_REGULATION_OF_CARDIAC_MUSCLE_CELL_PROLIFERATION	0.000933362
BLCA_662	GO_POSITIVE_REGULATION_OF_INSULIN_LIKE_GROWTH_FACTOR_RECEPTOR_SIGNALING_PATHWAY	0.00011862
BLCA_662	GO_REGULATION_OF_ACTIVATED_T_CELL_PROLIFERATION	0.00635313
BLCA_662	GO_REGULATION_OF_CARDIAC_MUSCLE_CELL_PROLIFERATION	0.000185637
BLCA_662	GO_REGULATION_OF_CELL_PROLIFERATION	0.00444466
BLCA_662	GO_REGULATION_OF_CELL_PROLIFERATION_INVOLVED_IN_HEART_MORPHOGENESIS	1.39649e-06
BLCA_662	GO_REGULATION_OF_GLIAL_CELL_PROLIFERATION	3.20171e-06
BLCA_662	GO_REGULATION_OF_INSULIN_LIKE_GROWTH_FACTOR_RECEPTOR_SIGNALING_PATHWAY	9.31912e-05
BLCA_662	GO_REGULATION_OF_MAMMARY_GLAND_EPITHELIAL_CELL_PROLIFERATION	4.07965e-06
BLCA_662	GO_REGULATION_OF_NEURAL_PRECURSOR_CELL_PROLIFERATION	0.00725341
BLCA_662	GO_REGULATION_OF_SMOOTH_MUSCLE_CELL_PROLIFERATION	0.000206807
BLCA_662	GO_RESPONSE_TO_NERVE_GROWTH_FACTOR	0.00648633
BLCA_662	GO_VASCULAR_ENDOTHELIAL_GROWTH_FACTOR_SIGNALING_PATHWAY	0.000981088
BLCA_663	GO_GROWTH_FACTOR_RECEPTOR_BINDING	0.00630494
BLCA_663	GO_REGULATION_OF_EPIDERMAL_GROWTH_FACTOR_ACTIVATED_RECEPTOR_ACTIVITY	0.0044553
BLCA_664	GO_NEGATIVE_REGULATION_OF_B_CELL_PROLIFERATION	0.000198181
BLCA_664	GO_NEGATIVE_REGULATION_OF_GLIAL_CELL_PROLIFERATION	0.000292817
BLCA_664	GO_POSITIVE_REGULATION_OF_OSTEOBLAST_PROLIFERATION	0.00714356
BLCA_664	GO_REGULATION_OF_CELL_PROLIFERATION_INVOLVED_IN_HEART_MORPHOGENESIS	0.00682332
BLCA_664	GO_REGULATION_OF_GLIAL_CELL_PROLIFERATION	0.000583258
SARC_531	GO_CELLULAR_RESPONSE_TO_EPIDERMAL_GROWTH_FACTOR_STIMULUS	0.000769433
SARC_531	GO_CELL_PROLIFERATION	0.00684299
SARC_531	GO_FIBROBLAST_GROWTH_FACTOR_RECEPTOR_BINDING	0.000617444
SARC_531	GO_GROWTH_FACTOR_BINDING	0.00086354
SARC_531	GO_GROWTH_FACTOR_RECEPTOR_BINDING	0.00534554
SARC_531	GO_LOCOMOTION	0.00201499
SARC_531	GO_MAMMARY_GLAND_EPITHELIAL_CELL_PROLIFERATION	5.14021e-07
SARC_531	GO_NEGATIVE_REGULATION_OF_FIBROBLAST_PROLIFERATION	0.00386473
SARC_531	GO_PLATELET_DERIVED_GROWTH_FACTOR_BINDING	0.00115834
SARC_531	GO_POSITIVE_REGULATION_OF_ACTIVATED_T_CELL_PROLIFERATION	0.00132068
SARC_531	GO_POSITIVE_REGULATION_OF_B_CELL_PROLIFERATION	0.00932657
SARC_531	GO_POSITIVE_REGULATION_OF_EPITHELIAL_CELL_PROLIFERATION	0.000337894
SARC_531	GO_POSITIVE_REGULATION_OF_LEUKOCYTE_PROLIFERATION	0.00250482
SARC_531	GO_POSITIVE_REGULATION_OF_LOCOMOTION	0.00107705
SARC_531	GO_POSITIVE_REGULATION_OF_STEM_CELL_PROLIFERATION	0.00277959
SARC_531	GO_REGULATION_OF_ACTIVATED_T_CELL_PROLIFERATION	0.00688096
SARC_531	GO_REGULATION_OF_CARDIAC_MUSCLE_CELL_PROLIFERATION	0.00703467
SARC_531	GO_REGULATION_OF_CELL_MIGRATION_INVOLVED_IN_SPROUTING_ANGIOGENESIS	0.000463183
SARC_531	GO_REGULATION_OF_CELL_PROLIFERATION_INVOLVED_IN_HEART_MORPHOGENESIS	0.00999283
SARC_531	GO_REGULATION_OF_GLIAL_CELL_PROLIFERATION	9.28226e-06
SARC_531	GO_REGULATION_OF_HEPATOCYTE_PROLIFERATION	0.00546848
SARC_531	GO_REGULATION_OF_MAMMARY_GLAND_EPITHELIAL_CELL_PROLIFERATION	4.32946e-07
SARC_531	GO_REGULATION_OF_PLATELET_DERIVED_GROWTH_FACTOR_RECEPTOR_SIGNALING_PATHWAY	0.000144347
SARC_531	GO_REGULATION_OF_SPROUTING_ANGIOGENESIS	0.000271395
SARC_531	GO_RESPONSE_TO_EPIDERMAL_GROWTH_FACTOR	0.000689587
SARC_531	GO_RESPONSE_TO_FIBROBLAST_GROWTH_FACTOR	0.000652596
SARC_531	GO_RESPONSE_TO_GROWTH_FACTOR	0.00157285
SARC_531	GO_RESPONSE_TO_TRANSFORMING_GROWTH_FACTOR_BETA	0.00164504
SARC_531	GO_TRANSFORMING_GROWTH_FACTOR_BETA_RECEPTOR_BINDING	0.00751415
SARC_531	GO_T_CELL_PROLIFERATION	0.00860639
SARC_611	GO_CELLULAR_RESPONSE_TO_EPIDERMAL_GROWTH_FACTOR_STIMULUS	0.000769433
SARC_611	GO_CELL_PROLIFERATION	0.00684299
SARC_611	GO_FIBROBLAST_GROWTH_FACTOR_RECEPTOR_BINDING	0.000617444
SARC_611	GO_GROWTH_FACTOR_BINDING	0.00086354
SARC_611	GO_GROWTH_FACTOR_RECEPTOR_BINDING	0.00534554
SARC_611	GO_LOCOMOTION	0.00201499
SARC_611	GO_MAMMARY_GLAND_EPITHELIAL_CELL_PROLIFERATION	5.14021e-07
SARC_611	GO_NEGATIVE_REGULATION_OF_FIBROBLAST_PROLIFERATION	0.00386473
SARC_611	GO_PLATELET_DERIVED_GROWTH_FACTOR_BINDING	0.00115834
SARC_611	GO_POSITIVE_REGULATION_OF_ACTIVATED_T_CELL_PROLIFERATION	0.00132068
SARC_611	GO_POSITIVE_REGULATION_OF_B_CELL_PROLIFERATION	0.00932657
SARC_611	GO_POSITIVE_REGULATION_OF_EPITHELIAL_CELL_PROLIFERATION	0.000337894
SARC_611	GO_POSITIVE_REGULATION_OF_LEUKOCYTE_PROLIFERATION	0.00250482
SARC_611	GO_POSITIVE_REGULATION_OF_LOCOMOTION	0.00107705
SARC_611	GO_POSITIVE_REGULATION_OF_STEM_CELL_PROLIFERATION	0.00277959
SARC_611	GO_REGULATION_OF_ACTIVATED_T_CELL_PROLIFERATION	0.00688096
SARC_611	GO_REGULATION_OF_CARDIAC_MUSCLE_CELL_PROLIFERATION	0.00703467
SARC_611	GO_REGULATION_OF_CELL_MIGRATION_INVOLVED_IN_SPROUTING_ANGIOGENESIS	0.000463183
SARC_611	GO_REGULATION_OF_CELL_PROLIFERATION_INVOLVED_IN_HEART_MORPHOGENESIS	0.00999283
SARC_611	GO_REGULATION_OF_GLIAL_CELL_PROLIFERATION	9.28226e-06
SARC_611	GO_REGULATION_OF_HEPATOCYTE_PROLIFERATION	0.00546848
SARC_611	GO_REGULATION_OF_MAMMARY_GLAND_EPITHELIAL_CELL_PROLIFERATION	4.32946e-07
SARC_611	GO_REGULATION_OF_PLATELET_DERIVED_GROWTH_FACTOR_RECEPTOR_SIGNALING_PATHWAY	0.000144347
SARC_611	GO_REGULATION_OF_SPROUTING_ANGIOGENESIS	0.000271395
SARC_611	GO_RESPONSE_TO_EPIDERMAL_GROWTH_FACTOR	0.000689587
SARC_611	GO_RESPONSE_TO_FIBROBLAST_GROWTH_FACTOR	0.000652596
SARC_611	GO_RESPONSE_TO_GROWTH_FACTOR	0.00157285
SARC_611	GO_RESPONSE_TO_TRANSFORMING_GROWTH_FACTOR_BETA	0.00164504
SARC_611	GO_TRANSFORMING_GROWTH_FACTOR_BETA_RECEPTOR_BINDING	0.00751415
SARC_611	GO_T_CELL_PROLIFERATION	0.00860639

## Sheet: ESP_vs_all_gene
ESP	Pvalue (measured by ranksum test)
THCA_551	0
THCA_641	0
LUAD_531	0.001279
LUAD_331	0.0015
LUAD_442	0.003231
LUAD_542	0.003231
LUAD_622	0.003231
LUAD_311	0.004379
SARC_531	0.004979
SARC_611	0.004979
GBM_312	0.00598
GBM_416	0.00598
BLCA_641	0.006103
LUAD_211	0.007711
LUAD_652	0.011592
THCA_521	0.018096
THCA_621	0.018096
OV_411	0.022192
LUAD_551	0.025108
LUAD_641	0.025108
LUAD_421	0.030037
GBM_622	0.031004
BLCA_646	0.037359
LIHC_643	0.040855
BLCA_321	0.048041
BLCA_323	0.049313
BLCA_544	0.049313
BLCA_634	0.049313
LUAD_423	0.050342
LIHC_554	0.056064
BLCA_519	0.056665
BLCA_619	0.056665
BLCA_541	0.057907
BLCA_411	0.070017
LIHC_632	0.072541
SARC_431	0.077621
SARC_551	0.077621
SARC_631	0.077621
LUAD_441	0.079565
LUAD_541	0.079565
LUAD_621	0.079565
BLCA_211	0.106954
LUAD_431	0.108438
BLCA_332	0.110367
BLCA_514	0.110367
BLCA_614	0.110367
GBM_522	0.111649
GBM_612	0.111649
BLCA_664	0.121241
BLCA_334	0.127861
GBM_542	0.130608
GBM_662	0.130608
LIHC_431	0.134814
LIHC_621	0.134814
BLCA_423	0.143153
BLCA_662	0.143153
GBM_432	0.144669
GBM_512	0.144669
LIHC_652	0.155081
LUAD_212	0.155732
GBM_541	0.167754
GBM_661	0.167754
LUAD_332	0.189212
LIHC_212	0.214309
GBM_211	0.24869
GBM_311	0.24869
BLCA_532	0.258538
LIHC_332	0.265697
LIHC_552	0.282557
LIHC_642	0.282557
LIHC_422	0.285838
LIHC_522	0.285838
LIHC_612	0.285838
LIHC_511	0.307084
BLCA_421	0.309972
LIHC_631	0.333887
BLCA_413	0.342404
BLCA_213	0.392993
LIHC_441	0.426515
THCA_211	0.456931
THCA_321	0.456931
THCA_411	0.456931
LIHC_421	0.479442
LIHC_521	0.479442
LIHC_611	0.479442
LIHC_641	0.479442
LIHC_311	0.523995
BLCA_551	0.532816
BLCA_631	0.532816
LIHC_531	0.538118
GBM_411	0.566609
BLCA_533	0.60288
GBM_642	0.603382
GBM_521	0.610056
GBM_611	0.610056
LUAD_512	0.651978
LUAD_662	0.651978
BLCA_412	0.659636
BLCA_531	0.659636
BLCA_542	0.659636
BLCA_642	0.659636
BLCA_661	0.659636
BLCA_333	0.708926
BLCA_424	0.708926
BLCA_516	0.708926
BLCA_616	0.708926
GBM_321	0.746525
GBM_441	0.746525
GBM_551	0.746525
GBM_631	0.746525
BLCA_513	0.754211
BLCA_613	0.754211
LIHC_541	0.767824
LIHC_411	0.769976
LIHC_661	0.769976
BLCA_663	0.826794
BLCA_335	0.866075

## Sheet: GO_gene_annotation
Gene Ontology terms known to be related to cancer	Genes
GO_POSITIVE_REGULATION_OF_SMOOTH_MUSCLE_CELL_PROLIFERATION	PDGFRB,CDH13,FOXP1,HDAC4,PTGS2,JUN,ITGA2,NAMPT,HIF1A,RETN,NOX1,PTAFR,ALOX12,GSK3B,MNAT1,CYBA,FLT1,DDX39B,STAT1,ID2,S1PR1,CCL5,AGER,PPARGC1A,HBEGF,EDN1,IRAK1,IRAK4,TGFBR2,PDGFB,IGF1,PDGFD,SHC1,TRAF6,CALCRL,CAMK2D,NR4A3,IL6R,CX3CL1,TNF,MTOR,HMGCR,SERPINF2,SKP2,AKR1B1,ORC1,FGFR2,NOTCH3,BMP4,NPY5R,C3AR1,IL13,HMOX1,AIF1,IL6,STAT5B,ELANE,EREG,RPS6KB1,HES5,
GO_POSITIVE_REGULATION_OF_LOCOMOTION	PPAP2B,HSPA5,SCG2,PDCD10,SEMA4A,SEMA4B,SEMA4C,SEMA4D,LGALS1,SEMA4F,SEMA4G,ZNF703,PIK3CD,RETN,PTGER3,IGF1R,DIAPH1,CSF1R,IFNG,LRRC16A,CXCL11,CXCL10,CXCL13,CXCL12,GATA3,CXCL16,PODXL,RNASE10,GTSE1,ANGPTL3,MMP14,LGR6,ACVR1B,ITGA2,ITGA3,ITGA4,ITGA5,GPLD1,EDNRA,SWAP70,SERPINE1,AGT,JAK2,CCL21,CCL20,CCL24,CCL26,VEGFA,VEGFC,VEGFB,TACR1,TCAF2,ITGAV,INS,PTGER4,FBXO31,FOXC2,ACP5,RET,SMAD3,SPARC,S100A7,ATOH8,C…
GO_STEM_CELL_PROLIFERATION	WNT3A,WNT2B,TRIM71,CTC1,FGFR1,CD34,DOCK7,FRS2,CTNNB1,SHH,FGF7,HAND2,TEAD3,NES,SOX5,PLXNB2,STAT1,RACGAP1,FZD9,WNT10B,EML1,SIX2,FGFR2,ABCB1,FGF13,RAB10,DCT,KCNA1,NUMBL,DAGLA,SFRP2,DAGLB,ARIH2,ASCL1,RNF43,OSR1,MECOM,GPC3,NUMB,MSX1,SART3,LEF1,FGF4,PAFAH1B1,BMP2,BMP7,NDE1,BMP4,ZNRF3,NEUROD4,ETV6,ID4,ARTN,NKAP,RUNX1,ASPM,WNT5A,HHIP,WNT1,WNT7B,
GO_TRANSFORMING_GROWTH_FACTOR_BETA_RECEPTOR_SIGNALING_PATHWAY	ZFYVE9,DUSP22,ZYX,FURIN,MAP3K7,PARD6A,FMOD,SMAD5,MTMR4,CDH5,FNTA,ARHGEF18,LEFTY2,CREB1,LEFTY1,BAMBI,FOXH1,GDF15,HIPK2,ADAM9,UBA52,EID2,UBB,FKBP1A,CCL2,RPS27A,COL3A1,SKI,APOA1,SMURF1,ENG,JUN,NLK,CLDN5,GDF10,ACVRL1,FOS,UBC,PARP1,MSTN,RHOA,F11R,UBE2M,CBL,SMAD9,SMAD4,NODAL,SMAD6,SMAD7,SMAD1,SMAD2,SMAD3,PTK2,ARRB2,HPGD,NEDD8,CGN,PML,CITED1,TGFBR3,TGFBR2,TGFBR1,FERMT2,TGFBRAP1,ID1,COL1A2,TGFB1,TGFB2,TG…
GO_RESPONSE_TO_FIBROBLAST_GROWTH_FACTOR	FGFRL1,NCBP1,NCBP2,SPRED1,SPRED2,FGFR4,LHX1,NDST1,ESRP2,ESRP1,FGFBP1,PTBP1,FLRT1,POSTN,FLRT3,FLRT2,SNAI2,CXCL13,FGFR2,FGFR3,FGFR1,GTF2F1,GTF2F2,HYAL2,PTPN11,RUNX2,UBA52,GRB2,UBB,CXCL8,CPS1,KDM5B,CCL2,STAR,CCL5,DSTYK,RPS27A,FRS3,FRS2,KL,PTH,EGR3,CTGF,ELK1,TIAL1,UBC,POLR2E,POLR2D,POLR2G,POLR2F,POLR2A,FGF9,POLR2B,FGF7,FGF6,FGF5,SCGB1A1,POLR2I,POLR2H,FGF1,POLR2J,RBFOX2,NOG,CBL,SNCA,FGF22,FGF23,GALNT3…
GO_RESPONSE_TO_NERVE_GROWTH_FACTOR	BPTF,KCNC1,EHD1,STMN2,KAT2A,AKT1,CORO1A,RAPGEF1,RAPGEF2,EEF2K,PTN,RAB35,KCNC2,TAC1,DNMT1,NTRK1,NTRK2,CSNK1D,CIB1,MAGI2,NFKB1,CDC5L,CREB1,KIDINS220,ACAP2,RAP1A,APC,EP300,E2F1,MICALL1,NTS,ID1,EEF2,SORT1,CALCA,APP,EIF4A3,
GO_REGULATION_OF_GLIAL_CELL_PROLIFERATION	PRKCI,PRKCH,CERS2,PTN,ASCL2,GFAP,LTA,CREB1,NOTCH1,UFL1,SKI,DICER1,MTOR,HES1,ADCYAP1,SOX11,ETV5,LYN,PLAG1,TSPO,RNF10,
GO_REGULATION_OF_INSULIN_LIKE_GROWTH_FACTOR_RECEPTOR_SIGNALING_PATHWAY	GHRHR,GHRH,TRIM72,PHIP,CDH3,KIAA1161,IGF1,IGFBP2,IGFBP3,IGFBP1,IGFBP6,IGFBP4,IGFBP5,GHSR,BMP2,POU1F1,BMP5,GH1,WNT1,CILP,NKX3-1,ATXN7,
GO_REGULATION_OF_NEURAL_PRECURSOR_CELL_PROLIFERATION	WNT3A,TGFB1,ZNF335,TRIM71,SLC6A4,ID2,FOXO3,ILK,HIF1A,PTPRZ1,CTNNB1,SPINT1,CCR2,RAPGEF1,ADCYAP1,KDM1A,DLL4,CEND1,EMX1,NES,LHX1,FZD3,BTG2,LRRK2,GLI3,SOX10,ASPM,IL1B,SIX3,GLI2,DISC1,VAX1,GLI1,NF2,NF1,ELL3,PTBP2,LYN,KDM2B,EGF,SIRT2,LIMS2,GPR37L1,DCT,CTNNA1,ASCL1,KIAA1524,CX3CL1,PAX6,SMARCD3,PTCHD2,VEGFC,SHH,GATA2,PROX1,NOTCH1,LHX5,SMO,KCTD11,CDH2,SHCBP1,CX3CR1,DMRTA2,DRD2,FOXO1,INSM1,CDON,GNG5,ADGRG1…
GO_REGULATION_OF_LEUKOCYTE_PROLIFERATION	SFTPD,CD74,PRKAR1A,CCR2,ADA,AGER,IL6ST,IL21,EPO,ZNF335,IL27,RASAL3,DLG1,SLC39A10,GPAM,IL12RB1,ZP3,GPR183,PRNP,ZP4,TNFRSF13C,XCL1,SPN,FADD,LYN,ERBB2,HLA-DPB1,CDKN2A,IL2RA,IFNG,HLA-DRB3,HLA-DRB1,HLA-DRB4,HLA-DRB5,TNFRSF4,TNFRSF21,KITLG,MIF,OCSTAMP,DNAJA3,BMP4,INPP5D,LST1,CD4,SYK,CSF1,AHR,HHLA2,IHH,VTCN1,BST1,TLR4,LMO1,CD300A,CD3E,FOXP3,CD1D,IL20RB,CCL5,CCL8,TNFSF18,HLA-G,HLA-E,RC3H1,CD209,TNFRSF14,…
GO_NEGATIVE_REGULATION_OF_SPROUTING_ANGIOGENESIS	STARD13,HDAC5,MMRN2,SYNJ2BP,NOTCH1,KLF4,DLL4,MAP2K5,PDCD10,RHOA,ITGB1BP1,
GO_VASCULAR_ENDOTHELIAL_GROWTH_FACTOR_RECEPTOR_SIGNALING_PATHWAY	CCL2,NCF2,NCF1,PTK2,PRKD2,ACTG1,VAV2,ROCK2,DOCK1,BRK1,PTK2B,NCKAP1L,MAPK11,MAPK12,MAPK13,CRK,FLT4,MAPKAPK3,MAPKAPK2,AXL,FLT1,PGF,WASF2,PIK3CA,PIK3CB,HSPB1,FYN,SULF1,PIK3R2,PIK3R1,PDCD6,PAK2,XBP1,KDR,PXN,FIGF,SRC,ITGB3,ELMO1,SHC2,RAC1,SHB,DAB2IP,NCKAP1,CYBB,SH2D2A,CYBA,VEGFA,VEGFC,BAIAP2,CYFIP1,RHOA,BCAR1,NRP1,NRP2,MAPK14,NCK1,NCK2,CYFIP2,VAV1,VAV3,ABI1,ROCK1,ITGAV,FOXC2,NCF4,VEGFB,BMPR2,ELMO2,HSP…
GO_PLATELET_DERIVED_GROWTH_FACTOR_BINDING	PDGFRB,PDGFB,PDGFA,PDGFRA,COL5A1,COL1A2,COL4A1,COL1A1,COL6A1,COL3A1,COL2A1,
GO_MESENCHYMAL_CELL_PROLIFERATION	BMP7,BMP4,BMP2,STAT1,OSR1,CTNNB1,FGF7,GPC3,HAND2,SHH,MSX1,FGF4,FGFR2,
GO_NEGATIVE_REGULATION_OF_KERATINOCYTE_PROLIFERATION	EFNB2,INTU,VDR,CD109,SLURP1,KDF1,SFN,MED1,CASK,KLF9,SNAI2,PTPRK,CTSV,
GO_REGULATION_OF_ALPHA_BETA_T_CELL_PROLIFERATION	ITCH,CD55,HLA-A,IL12B,HLA-E,CD244,CCR2,RIPK2,RASAL3,IL23A,CD80,XCL1,ZAP70,C10orf54,TNFSF4,CD28,LGALS9,IL18,IRF1,SYK,TNFRSF14,EBI3,CD3E,
GO_POSITIVE_REGULATION_OF_MESENCHYMAL_CELL_PROLIFERATION	FOXP2,TGFBR2,CTNNB1,BMPR1A,TBX1,TP63,STAT1,SIX1,CHRD,FOXF1,MYC,FBXW4,PDGFA,MYCN,SHOX2,VEGFA,FGF9,SHH,FGFR2,FGFR1,SMO,LRP5,WNT2,IRS2,SOX9,PRRX1,WNT5A,
GO_REGULATION_OF_MYOBLAST_PROLIFERATION	MYOD1,ANKRD2,MSTN,PPARD,SOX15,PAX7,PITX2,KLHL41,KCNA5,PAXBP1,NEU1,
GO_MAMMARY_GLAND_EPITHELIAL_CELL_PROLIFERATION	CEBPB,TNFSF11,ESR1,CCND1,BTRC,ID2,STAT6,EPHA2,MAPK1,MED1,WNT5A,AREG,
GO_REGULATION_OF_CELL_PROLIFERATION_INVOLVED_IN_HEART_MORPHOGENESIS	BMP4,NACA,ISL1,SMAD4,EYA1,RBPJ,SIX1,NOTCH1,CTNNB1,GNG5,BMP10,HAND2,TBX5,HES1,SOX9,
GO_EPIDERMAL_GROWTH_FACTOR_RECEPTOR_SIGNALING_PATHWAY	PLCG1,TGFB1,PTK2,ERBB2IP,SRC,PAG1,HRAS,RASSF2,EGFR,GAB1,ARF4,PTK2B,SOX9,PLCE1,TDGF1,EPS8,ADAM17,ABL1,FAM83B,FAM83A,CAMLG,IQGAP1,SHC1,SOS1,EPS15,PIK3CA,NRAS,REPS2,HBEGF,VIL1,PXN,PIK3R1,KRAS,EGF,DGKD,KIF16B,BTC,CSK,SHC3,EFEMP1,PIGR,FES,BCAR1,RPS6KA5,SOCS5,GAREM,NCK2,PTPN11,PIK3C2A,CBL,GRB2,EREG,GRB7,PDPK1,AREG,
GO_LEUKOCYTE_PROLIFERATION	MS4A1,IFNW1,PSMB10,PIK3CG,IFNA13,IFNA10,IFNA17,IFNA16,IFNA14,NPR3,IFNK,IFNE,GAPT,CCND3,CSF1,KIT,FKBP1B,TLR4,IL7R,TNFSF11,TNFSF14,DOCK2,TNFSF18,NCSTN,RC3H1,CD151,RC3H2,WNT4,LILRB1,SLC11A1,TNFRSF4,IFNA6,CD40,RAG2,CR2,TBK1,MEF2C,CD40LG,ACE,BTN3A1,DOCK8,RPS6,ABL1,CD86,FLT3,CD79A,CTPS1,HPRT1,IFNB1,AZI2,CADM1,HELLS,PLCL2,SATB1,CLU,LEF1,CD180,CRTAM,IFNA8,IL10,IFNA2,IFNA1,IFNA7,IL15,IFNA5,IFNA4,IFNA21,LE…
GO_T_CELL_PROLIFERATION	DOCK8,IL23A,TNFSF14,DOCK2,TNFSF18,BAX,NCSTN,RC3H1,CD151,RC3H2,ABL1,CD86,ELF4,P2RX7,CTPS1,SLC11A1,BTN3A1,FYN,PIK3CG,PSMB10,TNFRSF4,MALT1,TNFSF4,SATB1,CRTAM,LILRB1,RPS6,CCND3,IL15,WNT4,RIPK2,FKBP1B,LEXM,PPP3CB,CADM1,EBI3,
GO_RESPONSE_TO_TRANSFORMING_GROWTH_FACTOR_BETA	STK16,MEN1,ZFYVE9,RAPGEF3,DUSP22,ZYX,CAV1,COL1A1,WNT10A,DNMT1,MAP3K7,PARD6A,XCL1,FMOD,SMAD5,EDN1,MTMR4,CDH5,FNTA,ARHGEF18,LEFTY2,CREB1,LEFTY1,POSTN,BAMBI,SMAD2,FOXH1,GDF15,FN1,CX3CR1,HIPK2,HYAL2,ADAM9,RUNX3,UBA52,EID2,UBB,FKBP1A,WNT7A,CCL2,STAR,CCL5,RPS27A,NOX4,ITGB5,ID1,SKI,APOA1,IL1R1,SMURF1,PPM1A,FOS,JUN,PPARGC1A,SCX,NLK,FURIN,CLDN5,GDF10,ACVRL1,ENG,UBC,PARP1,MSTN,COL4A2,RHOA,F11R,UBE2M,ARG1,C…
GO_POSITIVE_REGULATION_OF_LEUKOCYTE_PROLIFERATION	CD38,CD74,CCR2,AGER,IL6ST,IL21,EPO,ZNF335,RASAL3,SLC39A10,GPAM,IL12RB1,ZP3,GPR183,ZP4,TNFRSF13C,XCL1,SPN,FADD,LYN,HLA-DPB1,CD28,IFNG,CD24,CLCF1,KITLG,MIF,OCSTAMP,DNAJA3,SYK,CSF1,VTCN1,BST1,TLR4,CD3E,FOXP3,CD1D,CCL5,CDKN1A,HLA-E,DHPS,ICOSLG,IL6,LILRB2,TIRAP,SPTA1,JAK3,TNFRSF4,RIPK2,IGF2,IGF1,TCF3,IGFBP2,CD55,SHH,TACR1,CD274,VAV3,CD276,MEF2C,HES1,CCDC88B,WNT3A,EFNB1,CD40LG,NFATC2,CD4,CD6,IL1B,TNFSF…
GO_POSITIVE_REGULATION_OF_VASCULAR_ENDOTHELIAL_GROWTH_FACTOR_PRODUCTION	PTGS2,TGFB1,ISL1,HIF1A,IL6ST,NOX1,C5AR1,RORA,IL1A,FLT4,IL1B,ADORA2B,CYP1B1,SULF2,SULF1,NODAL,C3,C5,BRCA1,CCBE1,GATA4,HPSE,ARNT,C3AR1,EIF2AK3,ATF4,
GO_NEGATIVE_REGULATION_OF_NEURAL_PRECURSOR_CELL_PROLIFERATION	TGFB1,SIRT2,KCTD11,SPINT1,BTG2,VAX1,SLC6A4,WNT5A,ID2,ILK,CTNNA1,LIMS2,CCR2,PAX6,NR2E1,NF1,CEND1,KDM2B,GATA2,IL1B,RAPGEF1,
GO_NEGATIVE_REGULATION_OF_LOCOMOTION	TRIM11,TRIM10,ELANE,TIMP1,WNT5A,NISCH,AGER,C5AR2,LDLRAD4,PKP2,PDCD10,SEMA4A,FBLN1,SEMA4C,SEMA4D,CXCL13,ADIPOQ,GSN,SPINT2,CERS2,SEMA3A,STAT3,PTGER4,SEMA7A,ARPIN,STRAP,SEMG1,STAP1,SEMG2,MAGI2,MARVELD3,THY1,IFITM3,IFITM2,IFITM1,SMAD7,ERBB4,TRIM25,TRIM26,ANGPT2,OSBPL8,SFRP1,SRGAP3,ARRDC3,ABHD2,HRG,CXCL12,ABHD6,GATA3,KLRC4-KLRK1,BMP5,TGFB1,CX3CR1,ROBO1,HYAL2,ROBO2,KANK1,GSK3B,WNT3,ADGRG1,BST2,DLL4,STC…
GO_POSITIVE_REGULATION_OF_INSULIN_LIKE_GROWTH_FACTOR_RECEPTOR_SIGNALING_PATHWAY	GHRHR,IGF1,GH1,WNT1,IGFBP5,IGFBP3,GHRH,IGFBP4,PHIP,GHSR,CDH3,KIAA1161,
GO_VASCULAR_ENDOTHELIAL_GROWTH_FACTOR_SIGNALING_PATHWAY	PDGFRB,PDGFRA,PRKD2,HSPB1,MYO1C,NRP1,VEGFA,FOXC1,PRKD1,NRP2,FLT4,FLT3,KDR,FLT1,
GO_GROWTH_FACTOR_BINDING	FGFRL1,GHR,TRIM16,HSPA9,PCSK6,CD36,IL6ST,GLG1,LIFR,S100A13,CXCL13,FURIN,FSTL4,NTRK1,NTRK2,NTRK3,FGFBP3,FGFBP2,SRPX2,ERBB2,ERBB3,IGF1R,API5,FGFR4,FGFR2,FGFR3,FGFR1,KAZALD1,HYAL2,BMPR2,PXDN,GHRHR,IL10RA,ACVR1C,ACVR1B,CYR61,PTN,LTBP1,WISP2,WISP3,WISP1,THBS1,IL36RN,HTRA3,ACVRL1,ENG,IGFBP2,IGFBP3,IGFBP1,IGFBP6,IGFBP7,IGFBP4,IGFBP5,IL1RN,ITGAV,RHBDF1,RHBDF2,HTRA1,SORT1,NOV,SCN5A,PDGFRB,PDGFRA,COL4A1,SD…
GO_NEGATIVE_REGULATION_OF_FIBROBLAST_GROWTH_FACTOR_RECEPTOR_SIGNALING_PATHWAY	PRDM14,SPRY2,FUZ,SULF2,SULF1,THBS1,GPC1,SPRY1,WNT5A,WNT4,GATA3,
GO_TRANSFORMING_GROWTH_FACTOR_BETA_RECEPTOR_BINDING	TGFB1,TGFB2,TGFB3,TGFBR2,NODAL,SMAD6,SMAD7,SMAD2,SMAD3,BMP10,BMP15,RASL11B,AMH,GDF9,SMURF2,GDF3,GDF2,GDF1,GDF7,GDF6,GDF5,INHBA,INHBB,INHBC,INHBE,GDF15,GDF11,GDF10,TGFBR3,INHA,TGFBR1,BMP8A,BMP8B,ENG,LEFTY2,LEFTY1,MSTN,USP15,LRG1,TGFBRAP1,BMP7,BMP6,BMP5,BMP4,BMP3,BMP2,BMP1,BAMBI,FKBP1A,SNX25,
GO_REGULATION_OF_EPITHELIAL_CELL_PROLIFERATION	TGM1,ERRFI1,HRSP12,AMICA1,STK11,EPB41L4B,MEN1,SAV1,C5AR2,TNMD,NKX2-8,C5AR1,RB1,IL26,PDCD10,XDH,CAV2,CAV1,DLG1,CDC73,ZNF703,FGFR2,WNT10B,SYNJ2BP,DEAF1,SIX1,GATA3,ATPIF1,EAF2,MARVELD3,CDH3,ERBB2,LIMS2,BRCA2,IFT57,CCL11,IFNG,HTR2B,SCG2,TACSTD2,F3,NKX3-1,ACVRL1,REG3G,SNAI2,EGFL7,CXCL12,SERPINB5,IFT122,CTSV,NME1,BMP6,BMP5,BMP4,BMP2,NME2,ODAM,ROBO1,MAGED1,HYAL1,RAB33B,CPB2,SFN,CCND1,VIP,TBX1,BMPR2,DLL4…
GO_CELL_PROLIFERATION_IN_FOREBRAIN	WNT3A,PCM1,DOCK7,KIF14,FABP7,RRM1,LHX5,DISC1,CEP120,SIX3,GLI3,DCT,ZEB2,NUMBL,POU3F3,POU3F2,HHEX,HOOK3,NUMB,FGF8,IGF2BP1,FGFR2,FGFR1,ARX,EMX2,DIXDC1,WNT7A,
GO_RESPONSE_TO_EPIDERMAL_GROWTH_FACTOR	ERRFI1,BAG4,EEF1A1,EGFR,AKT1,PLCG1,SOX9,TDGF1,IQGAP1,IL1R1,CAD,MAPK3,VIL1,MAPK1,BECN1,ASCL1,DAB2IP,MCM7,TPR,PAX2,SNAI2,GAREM,INPP5K,ZPR1,ID1,STAT5B,GSTP1,MED1,COL1A1,PDPK1,
GO_REGULATION_OF_FIBROBLAST_PROLIFERATION	CD74,MORC3,PDGFRA,PMAIP1,EMD,CTC1,CDKN1A,EGFR,AGER,BAX,MIF,CTNNB1,DACH1,IGF1,PLA2G1B,PDGFD,FBLN1,AGT,SKI,CDC6,UTS2R,CCNA2,CDC73,FGF10,AQP1,JUN,LIG4,TGFB1,TRIM32,NUPR1,NDUFS4,ANXA2,S100A6,ZMIZ1,B4GALT7,UTS2,PDGFA,PDGFB,PDGFC,C1QL4,SIRT6,FNTB,SPHK1,MED25,PPARG,MED31,DAB2IP,BMI1,IFI30,PML,LTA,SFRP1,CREB1,PRKDC,PTPRZ1,WAPL,MYC,NF1,FOSL2,CCNB1,PEX2,TP53,FN1,E2F1,ESR1,DDR2,WNT2,WNT1,IL13,PARP10,RNASEH2…
GO_REGULATION_OF_B_CELL_PROLIFERATION	CD38,WNT3A,NFATC2,NCKAP1L,CDKN1A,ATM,MIF,IL21,GPR183,IKZF3,TNFSF13B,TICAM1,SLC39A10,PELI1,TIRAP,CD81,MZB1,CHRNB2,TNFRSF13C,TNFRSF4,PTPRC,LYN,MEF2C,CTLA4,CDKN2A,TCF3,PKN1,CARD11,CD40,MNDA,CLCF1,ADA,PAWR,TNFRSF13B,SASH3,CD74,RC3H1,CD300A,INPP5D,CASP3,IL10,VAV3,IL13,TNFRSF21,IRS2,AHR,IL7,IL4,IL5,IL2,PRDM1,TLR4,BCL6,BST1,BCL2,
GO_POSITIVE_REGULATION_OF_CELLULAR_RESPONSE_TO_TRANSFORMING_GROWTH_FACTOR_BETA_STIMULUS	ITGA8,TGFBR3,SMAD4,STK11,MEN1,SDCBP,HIPK2,MYOCD,ADAM17,DAB2,FURIN,THBS1,CDKN1C,RNF111,CITED2,CITED1,CDKN2B,FLCN,TGFB1I1,GIPC1,LRG1,ING2,SNW1,NPNT,
GO_POSITIVE_REGULATION_OF_OSTEOBLAST_PROLIFERATION	HPSE,CYR61,BMP2,LRP5,ITGAV,TMEM119,SOX8,LTF,ABL1,CTHRC1,GATA1,
GO_EPIDERMAL_GROWTH_FACTOR_RECEPTOR_BINDING	SNX2,SNX1,EPGN,SNX4,ITGA5,FAM83B,EGF,YES1,MS4A1,TGFA,AREG,LINGO1,ARF4,HBEGF,CBLC,SHC1,ERBB4,EFEMP1,FER,SOCS5,TNK2,PLSCR1,VAV3,VAV2,AGR2,GRB2,EREG,BTC,RNF126,ATXN2,
GO_POSITIVE_REGULATION_OF_T_CELL_PROLIFERATION	AGER,IL6ST,IL21,EPO,VTCN1,RASAL3,GPAM,IL12RB1,ZP3,ZP4,TNFRSF13C,XCL1,SPN,FADD,HLA-DPB1,CD28,DNAJA3,IFNG,CD24,SPTA1,SYK,CCR2,CD3E,FOXP3,CD1D,CCL5,HLA-A,HLA-E,DHPS,ICOSLG,IL6,LILRB2,JAK3,IGF2,IGF1,IGFBP2,SHH,CD274,CD276,HES1,CCDC88B,EFNB1,CD40LG,CD4,CD6,IL1B,CD80,CD86,TNFSF9,TNFSF4,LGALS9,VCAM1,ADK,IL18,IL2RA,HHLA2,CCL19,IL15,LEP,STAT5B,IL4,RIPK2,IL2,HLA-DPA1,EBI3,SLAMF1,NCKAP1L,IL23A,CD55,HMGB1,CD…
GO_POSITIVE_REGULATION_OF_SPROUTING_ANGIOGENESIS	PTGS2,HDAC7,HDAC9,HMGB1,ITGA5,FGF2,DLL1,CCR2,CIB1,VEGFA,SRPX2,JAK1,PPP1R16B,FOXC2,
GO_RESPONSE_TO_GROWTH_FACTOR	ERRFI1,NCBP1,NCBP2,ZCCHC12,ZCCHC18,STK16,MEN1,HIPK2,DUSP22,EEF2K,LHX1,BYSL,SOX6,ZFYVE16,ARHGEF18,ANGPT2,GATA6,CXCL13,GATA5,GATA3,GTF2F1,GTF2F2,DSTYK,RPS27A,UBE2D3,UBE2D1,COL3A1,LIMS1,APOA1,CX3CR1,GDF15,FURIN,GDF10,MSTN,VEGFA,COL4A2,SLC39A5,NOG,CBL,PRDM4,SORT1,FOXC1,POLR2C,SMAD4,SMAD5,SMAD6,FGF8,SMAD1,SMAD2,SMAD3,FGF6,COL2A1,FGF5,HTRA2,RGMA,NEDD8,FGF4,FGF3,CDC34,FGF2,SPARC,POLR2K,SETX,CHRDL1,OPRM1…
GO_REGULATION_OF_CELL_MIGRATION_INVOLVED_IN_SPROUTING_ANGIOGENESIS	PTGS2,STARD13,HDAC5,SRPX2,HDAC7,HDAC9,MMRN2,KLF4,NOTCH1,CCR2,CIB1,DLL4,NR2E1,MAP2K5,PDCD10,VEGFA,RHOA,ITGB1BP1,FOXC2,
GO_REGULATION_OF_CELLULAR_RESPONSE_TO_GROWTH_FACTOR_STIMULUS	HSPA5,STK11,PCSK6,DAND5,HIPK2,LDLRAD4,SULF1,DAB2,OTX2,FKBP8,CAV3,CAV1,DCN,ADAMTS3,SPG20,ZNF703,NBL1,RBPJ,FSTL3,STRAP,AGT,SLC9A6,FGFBP3,FGFBP1,RNF111,MTMR4,ONECUT1,CDKN2B,BMPR2,NKX2-1,CRB2,MEN1,SMURF1,BAMBI,SFRP1,GATA6,GIPC1,HRG,SMAD3,FGFR2,GATA3,FGFR1,BMP4,GLG1,GRB10,CTDSPL2,XIAP,RUNX2,UBA52,EID2,UBB,UBC,CDKN1C,WNT1,HHIP,ITGA8,FLCN,DMD,SNX6,DSTYK,LRIT3,ITGA3,FUZ,ITGA5,HIF1A,HTRA4,LTBP4,DNM2,CYR61…
GO_GROWTH_FACTOR_ACTIVITY	LIF,TIMP1,MIA,BDNF,AGT,EGF,INHBA,INHBB,INHBC,INHBE,MANF,CDNF,HDGF,BMP8A,BMP7,GPI,BMP8B,LEFTY2,LEFTY1,NRG1,CLCF1,BMP4,KITLG,CXCL12,BMP2,CXCL1,BMP6,BMP5,JAG1,BMP3,GH1,BMP1,CSPG5,CSF1,CSF2,CSF3,ANGPTL3,GDF11,FIGF,NGF,EPGN,CNTF,IL6,TDGF1P3,AMELX,TGFA,PTN,GFER,WISP3,THBS4,CTGF,OSM,GDF15,NRTN,GDF10,IGF2,IGF1,AREG,EFEMP1,VGF,NUDT6,MSTN,VEGFA,FGF9,FGF8,FGF7,FGF6,FGF5,FGF4,FGF3,FGF2,FGF1,INHA,PROK1,BTC,NO…
GO_REGULATION_OF_VASCULAR_ENDOTHELIAL_GROWTH_FACTOR_RECEPTOR_SIGNALING_PATHWAY	FGF9,ITGA5,HIF1A,IL1B,MYOF,FLT1,FZD4,MMRN2,NEDD4,FGF18,TMEM204,PDCD6,FGF10,FIGF,ITGB3,HHEX,PRKCB,DAB2IP,VTN,VEGFA,VEGFC,VEGFB,PTPN1,ARNT,GRB10,MT3,PRKD2,
GO_POSITIVE_REGULATION_OF_EPITHELIAL_CELL_PROLIFERATION	TGM1,AMICA1,SCG2,C5AR2,AKT1,C5AR1,CAV2,ZNF304,CAV1,ZNF703,CDH3,ERBB2,SFRP1,REG3G,CXCL12,FGFR2,NME1,BMP6,BMP5,BMP4,BMP2,NME2,ODAM,CCND1,HYAL1,EGFL7,VIP,TBX1,BMPR2,CCL26,WNT7A,KDM5B,CCL2,TNFSF12,EPGN,MMP12,CCL5,HRAS,ITGB3,HIF1A,GLUL,MED1,LAMB1,RICTOR,TGFA,PTN,SRSF6,WDR48,SOX11,THBS4,JUN,IHH,NF1,HTR2B,B4GALT1,DLX5,DLX6,RREB1,CCL24,REG3A,SIRT1,ACVRL1,PDCL3,ZNF580,VEGFA,FGF9,VEGFB,FGF7,LAMC1,FGF2,FGF1…
GO_REGULATION_OF_CELLULAR_RESPONSE_TO_TRANSFORMING_GROWTH_FACTOR_BETA_STIMULUS	HSPA5,STK11,DAND5,HIPK2,LDLRAD4,DAB2,NKX2-1,LEMD3,CAV3,CAV1,ZNF703,STRAP,RNF111,MTMR4,SMAD6,CDKN2B,FLCN,MEN1,BAMBI,GIPC1,SMAD3,GLG1,UBA52,EID2,UBB,UBC,CD109,ITGA8,SNX6,TRIM33,ITGA3,DNM2,SKI,PEG10,ADAMTSL2,ZNF451,SMURF2,PPM1A,SOX11,THBS1,TGFB1I1,FURIN,SIRT1,RASL11B,ENG,PMEPA1,ZEB1,ING2,PRDM16,STUB1,SNX25,SMAD4,ONECUT2,ONECUT1,SMAD7,SMAD2,SDCBP,HTRA4,HTRA1,HTRA3,MECOM,ASPN,CDKN1C,CITED2,CITED1,TGFB…
GO_REGULATION_OF_CELLULAR_RESPONSE_TO_VASCULAR_ENDOTHELIAL_GROWTH_FACTOR_STIMULUS	DCN,CD63,ADAMTS3,CCBE1,ADAMTS12,DAB2IP,MYO1C,XDH,DLL1,ADGRA2,PTP4A3,HRG,
GO_CELLULAR_RESPONSE_TO_VASCULAR_ENDOTHELIAL_GROWTH_FACTOR_STIMULUS	FLT1,PDGFRB,PDGFRA,MYO1C,MAPK14,AKT1,FLT4,ITGB1BP1,FLT3,XBP1,EGR3,MAPKAPK2,MT1G,KDR,HSPB1,NR4A1,DAB2IP,RAMP2,FOXC1,DLL4,VCAM1,NRP1,NRP2,FN1,NOTCH1,ERN1,GAS1,VEGFA,PRKD1,PRKD2,
GO_REGULATION_OF_ACTIVATED_T_CELL_PROLIFERATION	FOXP3,IDO1,IL23A,HMGB1,AGER,RC3H1,EPO,RIPK3,IL23R,BTN2A2,ICOSLG,CLC,GPAM,IL12RB1,TMIGD2,PRNP,CD86,TNFSF9,JAK3,FADD,PYCARD,TNFSF4,IGF2,IGF1,PYDC1,IL12B,IGFBP2,LGALS9,PRKAR1A,PDCD1LG2,CD24,IL18,IL2RA,CASP3,HHLA2,CD274,STAT5B,IL4,IL2,SLAMF1,
GO_POSITIVE_REGULATION_OF_CELL_PROLIFERATION	ELANE,CRKL,CTC1,SCG2,IL6ST,HIPK2,HIPK1,ALOX12,LIFR,PDCD10,AGT,LEF1,DLG1,LHX1,RBPJ,BLOC1S2,ADK,ZNF703,GPR183,RETN,NAP1L1,HLA-DPA1,SRPK2,SPN,HTR2A,IRAK1,IRAK4,SIRPG,SFRP2,IGF1R,CAMK2D,BNC1,SP6,FTMT,SMARCD3,GATA6,CXCL10,CXCL12,OCSTAMP,GATA1,IL21,ADRA1D,ODAM,CCND1,PTEN,GADD45GIP1,WNT2,EIF5A2,AR,TNFSF13,TNFSF12,CD1D,MMP12,CDKN1B,ITGA2,NOP2,NACA,EDNRA,EDNRB,SIRT6,HPSE2,LILRB2,WDR48,SOX11,SOX15,TTK,IL5,…
GO_NEGATIVE_REGULATION_OF_B_CELL_PROLIFERATION	CTLA4,CDKN2A,INPP5D,CASP3,PKN1,ATM,RC3H1,IL10,TNFRSF21,PRDM1,MNDA,LYN,CD300A,TNFRSF13B,PAWR,
GO_REGULATION_OF_FIBROBLAST_GROWTH_FACTOR_RECEPTOR_SIGNALING_PATHWAY	NOG,DSTYK,LRIT3,FUZ,CTNNB1,SPRY2,SPRY1,THBS1,NPTN,SULF2,SULF1,OTX2,FGFBP3,FGFBP1,DUSP6,GPC1,FGFR2,GATA3,PRDM14,FAM20C,WNT4,RUNX2,WNT5A,PRKD2,HHIP,
GO_NEGATIVE_REGULATION_OF_GLIAL_CELL_PROLIFERATION	PTN,CERS2,ASCL2,SKI,NOTCH1,ADCYAP1,SOX11,DICER1,HES1,TSPO,RNF10,
GO_SPROUTING_ANGIOGENESIS	EFNB2,CDH13,PTK2B,GPLD1,TDGF1,BMPER,FLT4,ITGB1BP1,PGF,LOXL2,TEK,JMJD6,EGR3,THBS1,SLIT2,PARVA,ANGPT1,GREM1,ITGB1,E2F7,ACVRL1,SRF,KDR,EPHB4,CCBE1,OTULIN,NR4A1,RAMP2,DLL1,VEGFA,LEF1,NRP1,RSPO3,FGF2,BMP4,SEMA3E,SEMA5A,ROBO1,NOTCH1,NRARP,E2F8,ADGRA2,ESM1,RNF213,CDC42,
GO_REGULATION_OF_T_CELL_PROLIFERATION	SFTPD,AGER,IL6ST,IL21,EPO,VTCN1,IL27,RASAL3,DLG1,GPAM,IL12RB1,ZP3,PRNP,ZP4,TNFRSF13C,XCL1,SPN,FADD,ERBB2,HLA-DPB1,CDKN2A,IFNG,HLA-DRB3,HLA-DRB1,HLA-DRB4,HLA-DRB5,TNFRSF21,DNAJA3,BMP4,CD4,SYK,CCR2,HHLA2,IHH,LMO1,CD3E,FOXP3,CD1D,IL20RB,CCL5,HLA-A,TNFSF18,HLA-G,HLA-E,RC3H1,CD209,TNFRSF14,DHPS,KIAA0922,IL6,LILRB2,LILRB1,JAK3,C10orf54,PDE5A,IGF2,FOXJ1,IGF1,IGFBP2,GLMN,SCGB1A1,PTPN6,IRF1,CD274,CD276,HE…
GO_NEGATIVE_REGULATION_OF_TRANSFORMING_GROWTH_FACTOR_BETA_RECEPTOR_SIGNALING_PATHWAY	TGFB1,TGFB3,SNX6,HSPA5,TGFBR2,ONECUT2,ONECUT1,SMAD7,DAND5,SMAD2,SMAD3,GLG1,LDLRAD4,DNM2,HTRA4,BCL9L,PIN1,NKX2-1,LEMD3,HTRA1,PEG10,HTRA3,ADAMTSL2,ZNF451,SMURF2,PBLD,PPM1A,STUB1,SKI,ASPN,STRAP,ADAM17,TGFB1I1,CAV1,SMAD6,TGFBR3,PRDM16,TGFBR1,SKOR1,VASN,RASL11B,LTBP1,ENG,FBN2,PMEPA1,FBN1,BAMBI,SKIL,RPS27A,CIDEA,CHST11,MTMR4,CD109,SMURF1,CAV2,MECOM,UBA52,EID2,UBB,UBC,SIRT1,PDPK1,FAM89B,SKOR2,WNT1,SNX25,
GO_INNER_CELL_MASS_CELL_PROLIFERATION	GINS1,GINS4,SBDS,PALB2,ZPR1,TAF8,SALL4,BRCA2,NCAPG2,NDEL1,PRPF19,
GO_REGULATION_OF_SPROUTING_ANGIOGENESIS	PTGS2,STARD13,HDAC5,HDAC7,HDAC9,HMGB1,ITGA5,CCR2,MAP2K5,PDCD10,CIB1,ITGB1BP1,MMRN2,SYNJ2BP,KLF4,SRPX2,JAK1,FGF18,PPP1R16B,FGF16,DLL1,DLL4,NR2E1,RHOA,FGF2,NOTCH1,VEGFA,FOXC2,
GO_REGULATION_OF_VASCULAR_ENDOTHELIAL_GROWTH_FACTOR_PRODUCTION	CCL2,PTGS2,TGFB1,ISL1,HIF1A,IL6ST,NOX1,CCR2,C5AR1,RORA,IL1A,FLT4,IL1B,NUTF2,ADORA2B,CYP1B1,SULF2,SULF1,NDRG2,NODAL,C3,C5,BRCA1,CCBE1,GATA4,HPSE,ARNT,C3AR1,EIF2AK3,IL6,ATF4,
GO_POSITIVE_REGULATION_OF_STEM_CELL_PROLIFERATION	FOXP2,KDM1A,ZNF335,FGF9,TGFBR2,FBXW4,HIF1A,SMO,TBX3,TBX1,DPPA2,N4BP2L2,TP63,FZD3,ATXN1L,STAT1,DISC1,SOX10,ASPM,SIX1,THPO,GLI3,CHRD,FOXF1,CX3CL1,MYC,TERT,PDCD2,PDGFA,LTBP3,SIRT6,MYCN,HMGA2,PAX6,PRRX1,SHOX2,SMARCD3,NR2E1,VEGFC,SHH,EPCAM,KITLG,FGFR2,DCT,FGFR1,CTNNB1,BMP4,CX3CR1,LRP5,DMRTA2,WNT2,DRD2,NOTCH1,IRS2,BMPR1A,SOX9,PTPRC,SOX11,OTP,VEGFA,WNT5A,
GO_POSITIVE_REGULATION_OF_B_CELL_PROLIFERATION	CD74,CD38,NFATC2,GPR183,CDKN1A,MIF,IL21,NCKAP1L,TNFSF13B,TICAM1,SLC39A10,PELI1,TIRAP,CD81,CHRNB2,TNFRSF13C,TNFRSF4,PTPRC,TCF3,CARD11,CD40,CLCF1,ADA,SASH3,WNT3A,VAV3,IL13,IRS2,MEF2C,IL7,IL4,IL5,IL2,TLR4,BCL6,BST1,BCL2,
GO_REGULATION_OF_MESENCHYMAL_CELL_PROLIFERATION	PHF14,FOXP2,TGFBR2,SMO,BMPR1A,SOX9,TP63,STAT1,ZEB1,SIX1,CTNNB1,CHRD,FOXF1,MYC,FBXW4,PDGFA,PTN,SHOX2,VEGFA,FGF9,SHH,FGFR2,FGFR1,NFIB,BMP4,LRP5,WNT2,IRS2,TBX1,CTNNBIP1,PRRX1,MYCN,WNT5A,WNT11,
GO_STRIATED_MUSCLE_CELL_PROLIFERATION	TGFBR3,C3orf58,TGFB2,TK1,MEGF10,SMAD1,RXRA,BMP10,PRKAR1A,NOTCH1,TENM4,NDRG4,FOXC2,FOXC1,NKX2-5,
GO_REGULATION_OF_CARDIAC_MUSCLE_CELL_PROLIFERATION	TBX20,SAV1,TBX2,BMP10,MAPK11,TBX5,NKX2-5,FGFR2,RBPJ,KCNK2,NRG1,TGFBR2,ERBB4,GJA1,RBP4,FGF9,GATA6,HEY2,FGF2,FGFR1,MAPK14,CCNB1,WNT2,NOG,NOTCH1,TP73,MEF2C,CDK1,FGF20,
GO_POSITIVE_REGULATION_OF_EPIDERMAL_GROWTH_FACTOR_ACTIVATED_RECEPTOR_ACTIVITY	TGFA,EPGN,ADORA1,ADRA2A,ADRA2B,ADRA2C,NEURL1,EREG,ADAM17,EGF,FBXW7,
GO_POSITIVE_REGULATION_OF_NEURAL_PRECURSOR_CELL_PROLIFERATION	WNT3A,KDM1A,ZNF335,HIF1A,SMO,KIAA1524,DLL4,NES,LHX1,FZD3,LHX5,GLI3,SOX10,ASPM,EGF,GLI2,DISC1,CTNNB1,GLI1,ELL3,LYN,DCT,ASCL1,CX3CL1,PAX6,SMARCD3,PTCHD2,VEGFC,SHH,PROX1,GPR37L1,CX3CR1,DMRTA2,DRD2,NOTCH1,INSM1,CDON,GNG5,ADGRG1,OTP,VEGFA,NR2E1,
GO_ENDOTHELIAL_CELL_PROLIFERATION	MMP14,HMGB1,CD34,NOX5,BMPER,PRKX,ITGB1BP1,APOA1,XBP1,DLG1,LOXL2,TEK,PIK3CB,ERN1,ACVRL1,THAP1,BMP4,SEMA5A,SCARB1,HMOX1,NRARP,BMPR2,ANGPT4,CALCA,
GO_NEGATIVE_REGULATION_OF_CELLULAR_RESPONSE_TO_GROWTH_FACTOR_STIMULUS	HSPA5,DAND5,HIPK2,LDLRAD4,AGT,LEMD3,HRG,CAV1,DCN,SPG20,STUB1,FSTL3,STRAP,MTMR4,SMAD6,NKX2-1,BAMBI,CXCL13,GATA3,GLG1,UBA52,EID2,UBB,UBC,WNT1,SNX6,TRIM33,RPS27A,FUZ,HTRA4,DNM2,VWC2L,SKI,PEG10,ADAMTSL2,ZNF451,SMURF2,PPM1A,TWSG1,CAV2,THBS1,TGFB1I1,XDH,SIRT1,RASL11B,ENG,PMEPA1,PTPN1,PRDM16,PRDM14,NOG,ADGRA2,AGTR2,WNT5A,SNX25,SOST,ONECUT2,ONECUT1,SMAD7,SMAD2,SMAD3,SPRY2,SPRY1,ADAMTS12,ABL1,HTRA1,HTRA3,…
GO_ANGIOGENESIS_INVOLVED_IN_WOUND_HEALING	HPSE,ITGB3,SRF,GPR4,PIK3CB,CD34,NDNF,GPX1,B4GALT1,ETS1,MCAM,CX3CL1,ADIPOR2,PRCP,
GO_KERATINOCYTE_PROLIFERATION	TP63,CDH13,FGF10,IRF6,SDR16C5,KRT2,PPARD,FERMT1,EREG,KLK8,WNT16,PTCH1,
GO_REGULATION_OF_SMOOTH_MUSCLE_CELL_PROLIFERATION	PTGS2,ELANE,AGER,SF1,GPER1,AKR1B1,ADIPOQ,CAV1,DDX39B,RETN,EDN1,IRAK1,IRAK4,NPR1,NPR3,SHC1,CAMK2D,ILK,HMGCR,FGFR2,BMP4,TCF7L2,GSK3B,VIP,FOXP1,CCL5,CDKN1B,ITGA2,HIF1A,NOX1,TRIB1,NDRG2,XRCC5,XRCC6,APOD,MFN2,JUN,PPARGC1A,CX3CL1,NPPC,IGF1,PPARG,PPARD,IGFBP5,ORC1,TACR1,ANG,ESR2,ESR1,HMOX1,TNFAIP3,TNF,AIF1,PDGFRB,HDAC4,NAMPT,PRKDC,PTAFR,FLT1,IGFBP3,SKP2,STAT1,S1PR1,RPS6KB1,TPM1,HBEGF,TGFBR2,COMT,IL6R,MT…
GO_HEMATOPOIETIC_STEM_CELL_PROLIFERATION	SFRP2,WNT2B,ARIH2,ETV6,MECOM,CTC1,WNT10B,CD34,NKAP,RUNX1,SART3,WNT5A,WNT1,
GO_POSITIVE_REGULATION_OF_TRANSFORMING_GROWTH_FACTOR_BETA_PRODUCTION	FOXP3,PTGS2,THBS1,CD46,CD34,LGALS9,CREB1,ATP6AP2,XCL1,WNT11,SERPINF2,CX3CL1,SMAD3,LUM,SERPINB7,ATF2,
GO_B_CELL_PROLIFERATION	IL7R,CD40LG,BAX,ABL1,MS4A1,IFNW1,CTPS1,IFNB1,HSPD1,IFNA13,CD79A,IFNA17,IFNA16,IFNA14,IFNK,IFNE,PLCL2,PRKCD,CD40,RAG2,IFNA8,GAPT,LEF1,CD180,CR2,IFNA10,IL10,IFNA2,IFNA1,IFNA7,IFNA6,IFNA5,IFNA4,MEF2C,IFNA21,PTPRC,TLR4,BCL2,
GO_REGULATION_OF_SKELETAL_MUSCLE_CELL_PROLIFERATION	STAT3,CFLAR,MSTN,SIX5,SIX1,SEPN1,PPARD,SHH,MYOG,ANGPT1,PAXBP1,FGF2,
GO_NEURAL_PRECURSOR_CELL_PROLIFERATION	WNT3A,POU3F3,EML1,IFT20,RYK,EPHB1,PCM1,FGFR1,DOCK7,FRS2,KIF14,FABP7,HHEX,RRM1,NDE1,DBN1,RERE,ASPM,KCNA1,PLXNB2,GBX2,TRNP1,FZD3,LHX5,FZD6,DISC1,RACGAP1,CEP120,GRN,RORA,SIX3,IGF2BP1,GLI3,PSMG1,RPGRIP1,RAB10,DCT,SOX5,NUMBL,DAGLA,POU3F2,TEAD3,DAGLB,HOOK3,ASCL1,ORC3,FGF13,DIXDC1,NUMB,FGF8,SHH,LEF1,FGFR2,SLC39A5,ZEB2,PAFAH1B1,NEUROD4,ARX,WNT2,ID4,EMX2,MELK,C5AR1,FZD9,ATF5,ZNF503,ARTN,WNT7A,WNT1,HHIP,
KEGG_TGF_BETA_SIGNALING_PATHWAY	ZFYVE9,DCN,ZFYVE16,INHBA,INHBB,INHBC,INHBE,SMAD5,MYC,CUL1,CDKN2B,BMP8A,BMP8B,IFNG,SP1,LEFTY2,SMAD1,BMP7,BMP6,BMP5,BMP4,BMP2,PPP2CA,PPP2CB,BMPR2,RBX1,ACVR1C,SMURF1,AMH,SMURF2,THBS4,THBS2,THBS3,THBS1,ACVRL1,RHOA,NOG,TFDP1,SMAD9,PPP2R1A,SMAD4,NODAL,SMAD6,SMAD7,TGFB2,SMAD2,SMAD3,FST,SKP1,RPS6KB1,RPS6KB2,MAPK3,MAPK1,ACVR2A,ACVR2B,RBL1,RBL2,COMP,EP300,ID4,ID2,ID3,ID1,CHRD,TGFB1,PPP2R1B,TGFB3,ACVR1,TGFB…
GO_EPITHELIAL_CELL_PROLIFERATION	BCL2L2,CD34,SIDT2,DLG1,PIK3CB,PROX1,EHF,KLK8,FGFR2,NKX6-1,BMP4,FABP7,CCND1,SCARB1,KIT,BMPR2,LGR5,LGR4,TNFSF11,NCSTN,MED1,NOX5,APOA1,ANGPT4,ACVRL1,AREG,IGFBP3,PPARD,IGFBP4,IGFBP5,SHH,RPS6KA1,ESR2,IRF6,SEMA5A,ESR1,HMOX1,MEF2C,TNF,WNT5A,MMP14,EPHA2,KRT2,BTBD10,TP63,TEK,SDR16C5,PSEN1,MAPK1,C19orf80,FGF10,ERN1,ACVR2A,FERMT1,NOV,ADK,ID2,BAD,NRARP,IL6,EREG,NKX3-1,MKI67,CDH13,HMGB1,BAX,MAP2K2,MAP2K1,SOX9…
GO_NEGATIVE_REGULATION_OF_FIBROBLAST_PROLIFERATION	MORC3,PMAIP1,EMD,TRIM32,MED25,BAX,SKI,CDC73,NF1,MYC,FTH1,B4GALT7,NUPR1,C1QL4,MED31,DAB2IP,IFI30,PPARG,LTA,SFRP1,DACH1,PEX2,TP53,PARP10,GSTP1,AGTR2,CD300A,
GO_NEGATIVE_REGULATION_OF_CELL_PROLIFERATION	RNF10,PPAP2A,HRSP12,STK11,MEN1,PDCD10,ATPIF1,ADIPOQ,DLG1,DLG3,DLG5,CDC73,PRNP,SPN,CD276,KDM2B,SIRPG,WDR6,NPR3,IFNK,IFNG,SCG2,STK3,STK4,GATA2,GATA3,GATA1,ADRA1A,LST1,PARP10,BAK1,IL10,CTBP1,CTBP2,RAPGEF1,TSG101,ACVR1C,CDKN1C,ITGA1,CDKN1A,PDS5B,RC3H1,IL6,GPLD1,GABBR1,IFIT3,SERPINE2,BNIPL,IFNL1,APOD,APOE,LILRB2,LILRB1,SOX11,APOH,TNFRSF8,NF2,NF1,CCL23,GDF11,FOXJ1,TMEM127,MED31,PPARG,PPARD,COL4A3,VEGFC…
GO_ANGIOGENESIS	HIF3A,PTGS2,MFGE8,NRCAM,TBX20,TSPAN12,CD34,SCG2,PTK2B,RAPGEF3,PDCD10,SEMA4A,SOX17,EGF,ZNF304,CAV1,SETD2,FMNL3,RBPJ,KLF5,RORA,PIK3CG,ARHGAP22,SLC12A6,SRPX2,ARHGAP24,EDN1,PLXND1,THY1,SRPK2,ADM2,VEZF1,HPSE,GPI,RAMP1,RAMP2,CX3CL1,SH2D2A,BMP4,STK4,ELK3,TEK,HRG,TMEM100,FGFR2,HTATIP2,CXCL17,FGFR1,RSPO3,COL15A1,JAG1,FN1,CSPG4,GPR4,ROBO1,CXCL8,NRXN3,ROBO4,ADAM8,BAK1,EGFL7,SYK,ANGPTL4,ANGPTL3,ANGPT4,ADGRG1…
GO_CELLULAR_RESPONSE_TO_EPIDERMAL_GROWTH_FACTOR_STIMULUS	ERRFI1,BAG4,EEF1A1,EGFR,AKT1,PLCG1,SOX9,TDGF1,IQGAP1,CAD,VIL1,BECN1,DAB2IP,MCM7,PAX2,SNAI2,GAREM,INPP5K,ZPR1,ID1,STAT5B,GSTP1,MED1,COL1A1,PDPK1,
GO_NEUROBLAST_PROLIFERATION	WNT3A,DOCK7,FRS2,NDE1,TEAD3,SOX5,PLXNB2,RACGAP1,FZD9,EML1,FGFR2,FGF13,RAB10,DCT,KCNA1,NUMBL,DAGLA,DAGLB,ASCL1,NUMB,SHH,LEF1,PAFAH1B1,FGFR1,NEUROD4,ID4,ASPM,ARTN,HHIP,
GO_LOCOMOTION	ELANE,PPAP2B,PPAP2A,LTB4R2,SCG2,JPH3,GPM6A,L1CAM,PDCD10,SEMA4A,TYK2,SEMA4C,SEMA4D,SEMA4F,SEMA4G,LHX1,SGPL1,LHX3,LHX4,LHX6,LHX9,PIK3CB,ARPIN,PIK3CD,APBB2,PIK3CG,FSCN1,SPN,PRSS37,SLC9C1,IRAK4,PIK3R2,SIRPG,SIRPA,IFNG,LRRC16A,F2,ANGPT2,USP33,PIK3C2G,CSF3R,CLDN1,CXCL11,CXCL10,CXCL13,CXCL12,GATA2,GATA3,CXCL17,CXCL16,AKAP4,PPP1R9B,NEUROD4,CLRN1,SH3KBP1,LECT2,PPIL2,PTEN,PLTP,NRTN,MAG,ACE2,HOXA2,MMP14,TNF…
GO_REGULATION_OF_TRANSFORMING_GROWTH_FACTOR_BETA_PRODUCTION	PTGS2,TGFB2,FOXP3,SMAD4,CD34,HIF1A,SMAD3,ATP6AP2,LUM,FURIN,THBS1,XCL1,CX3CL1,CDH3,CD46,CREB1,CD24,LGALS9,SERPINF2,GATA6,SERPINB7,IL13,CD2AP,WNT11,ATF2,
GO_GROWTH_FACTOR_RECEPTOR_BINDING	PIBF1,IL6ST,IL21,EGF,MS4A1,LINGO1,IL12RB1,IL36A,LYN,IL36B,IRAK4,CBLC,IL36RN,SHC1,ERBB4,FLRT1,FLRT3,FLRT2,GATA3,SOCS5,APP,CSF2,CD2AP,PTEN,GRB2,TLR5,TRIP6,TLR9,SNX2,SNX1,EPGN,SNX4,ITGA5,FRS3,FRS2,ITGB3,GREM1,CSF3,IL1R1,TGFA,CNTF,JAK2,EREG,FIGF,PDCL3,EFEMP1,RNF41,VEGFA,VEGFC,FGF8,FGF7,FGF6,FGF5,FGF4,FGF3,FGF2,FGF1,TNK2,TOLLIP,PLSCR1,VAV3,VAV2,BTC,RNF126,FGF22,FGF23,FGF20,FGF21,PDGFRB,PDGFRA,FGF9,VEG…
GO_REGULATION_OF_CELL_PROLIFERATION_INVOLVED_IN_KIDNEY_DEVELOPMENT	BMP7,PDGFA,PDGFB,BMP4,PDGFD,FLCN,WT1,C3AR1,EGR1,LIN28A,MYC,GATA3,SERPINB7,
GO_INSULIN_LIKE_GROWTH_FACTOR_RECEPTOR_SIGNALING_PATHWAY	PLCB1,IGF1R,IGF2R,GIGYF1,GIGYF2,GRB10,EIF2AK3,IRS1,AKT1,IGF1,PIK3R1,CRIM1,TSC2,GHR,
GO_REGULATION_OF_TRANSFORMING_GROWTH_FACTOR_BETA_RECEPTOR_SIGNALING_PATHWAY	HSPA5,STK11,MEN1,HIPK2,LDLRAD4,DAB2,NKX2-1,LEMD3,CAV3,CAV1,ZNF703,STRAP,RNF111,MTMR4,SMAD6,CDKN2B,FLCN,DAND5,BAMBI,GIPC1,SMAD3,GLG1,UBA52,EID2,UBB,UBC,CD109,ITGA8,SNX6,TRIM33,ITGA3,DNM2,SKI,PEG10,ADAMTSL2,ZNF451,SMURF2,PPM1A,SOX11,THBS1,TGFB1I1,FURIN,SIRT1,RASL11B,ENG,PMEPA1,ZEB1,ING2,PRDM16,STUB1,SNX25,SMAD4,ONECUT2,ONECUT1,SMAD7,SMAD2,SDCBP,HTRA4,HTRA1,HTRA3,MECOM,ASPN,CDKN1C,CITED2,CITED1,TGFB…
GO_POSITIVE_REGULATION_OF_FIBROBLAST_PROLIFERATION	CD74,TGFB1,PDGFRA,CTC1,CDKN1A,EGFR,AGER,PTPRZ1,PRKDC,IGF1,PLA2G1B,FBLN1,AGT,CDC6,UTS2R,CCNA2,AQP1,JUN,LIG4,FOSL2,PML,CDK4,MYC,S100A6,UTS2,PDGFA,PDGFB,PDGFC,PDGFD,SIRT6,FNTB,SPHK1,BMI1,ANXA2,MIF,WAPL,ZMIZ1,CCNB1,FGF10,FN1,E2F1,ESR1,DDR2,WNT2,WNT1,IL13,RNASEH2B,BTC,NDUFS4,EREG,CDK6,WNT5A,GAS6,
GO_NEGATIVE_REGULATION_OF_EPITHELIAL_CELL_PROLIFERATION	HRSP12,STK11,MEN1,SAV1,TNMD,NKX2-8,RB1,IL26,PDCD10,THBS1,CAV2,CAV1,DLG1,CDC73,A4GNT,WNT10B,SYNJ2BP,STRAP,ATPIF1,EAF2,MARVELD3,CDKN2B,BRCA2,IFT57,AGER,SNAI2,FGFR2,GATA3,CTSV,BMP4,ROBO1,MAGED1,CPB2,SFN,PTEN,VDR,CDKN1C,CDKN1B,MED1,RGN,PTN,APOE,RUNX3,APOH,XDH,IFT52,NF1,SULF1,IFT122,ACVRL1,NKX3-1,ENG,IFT74,PPARD,PAX6,WFDC1,GJA1,PEX2,ESR2,ETV4,VASH1,SLURP1,MEF2C,GPC3,WNT5A,EFNB2,GHRL,SCG2,KRT4,STAT1,AT…
GO_REGULATION_OF_ENDOTHELIAL_CELL_PROLIFERATION	SCG2,TNMD,PDCD10,ATPIF1,CAV2,CAV1,SYNJ2BP,PPP1R16B,AGER,CXCL12,BMP6,BMP4,BMP2,AKT1,EGFL7,VIP,BMPR2,CCL2,TNFSF12,PDGFB,HIF1A,RICTOR,PLXNB3,APOE,EGR3,THBS4,JUN,APOH,XDH,NF1,HTR2B,ANGPT1,CCL24,CCL26,SIRT1,ACVRL1,PDCL3,ENG,ZNF580,VEGFA,VEGFB,FGF2,GJA1,ANG,VASH2,SEMA5A,ARG1,PRKD1,MYDGF,WNT5A,GHRL,CCR3,FLT4,TEK,STAT1,ATP5A1,NR2F2,SPARC,FGF18,PDCD6,FGF16,KDR,ATOH8,TGFBR1,DLL4,PROX1,CCL11,F3,VASH1,ARNT,W…
GO_REGULATION_OF_PLATELET_DERIVED_GROWTH_FACTOR_RECEPTOR_SIGNALING_PATHWAY	PHF14,SRC,APOD,LRP1,LRIG2,F7,SLC9A3R1,PTGIR,F3,SNCA,PTPN2,NDRG4,PTPRJ,ADIPOQ,
GO_POSITIVE_REGULATION_OF_VASCULAR_ENDOTHELIAL_GROWTH_FACTOR_RECEPTOR_SIGNALING_PATHWAY	ITGB3,ARNT,GRB10,PRKCB,ITGA5,HIF1A,VTN,FGF18,VEGFA,PRKD2,FGF9,MT3,IL1B,FGF10,VEGFB,FLT1,
GO_POSITIVE_REGULATION_OF_ACTIVATED_T_CELL_PROLIFERATION	IL23A,HMGB1,IL12B,EPO,IL23R,ICOSLG,GPAM,IL12RB1,TMIGD2,CD86,TNFSF9,JAK3,FADD,PYCARD,TNFSF4,IGF2,IGF1,PYDC1,AGER,IGFBP2,CD24,IL18,IL2RA,HHLA2,STAT5B,IL4,IL2,SLAMF1,
GO_MUSCLE_CELL_PROLIFERATION	TGFBR3,C3orf58,TGFB2,NAA35,TK1,MEGF10,SMAD1,RXRA,BMP10,PRKAR1A,NOTCH1,TENM4,EDNRA,NOV,AGT,NDRG4,FOXC2,FOXC1,NKX2-5,
GO_REGULATION_OF_KERATINOCYTE_PROLIFERATION	EFNB2,TGM1,VDR,EPB41L4B,KDF1,BCL11B,FGF7,MED1,OVOL2,TP63,SRSF6,CASK,REG3G,CDH3,FGF10,HAS2,REG3A,INTU,SNAI2,CTSV,YAP1,CD109,SLURP1,SFN,KLF9,PTPRK,PRKD1,STXBP4,
GO_FIBROBLAST_GROWTH_FACTOR_RECEPTOR_BINDING	FRS3,FRS2,NPTN,FGF19,FGF18,FGF12,FGF10,FGF17,FGF16,FGF14,KLB,FLRT1,FLRT3,FLRT2,FGF9,FGF8,FGF7,FGF6,FGF5,FGF4,FGF3,FGF2,FGF1,KL,FGF22,FGF23,FGF20,FGF21,
GO_TRANSFORMING_GROWTH_FACTOR_BETA_BINDING	TGFBR3,TGFBR2,TGFBR1,LTBP4,VASN,LTBP1,ENG,HYAL2,CD109,CD36,THBS1,TGFB3,ITGAV,ACVRL1,LTBP3,ACVR1,
GO_CELL_PROLIFERATION	IFT20,RYK,BUB1B,CTC1,IFNAR2,NAA60,DBN1,DUSP22,AGT,LEF1,DLG1,BYSL,LHX5,LHX9,PIK3CB,PIK3CG,IFNA13,IFNA10,IFNA17,IFNA16,IFNA14,LARP1,NPR3,IFNK,IFNE,BCAT1,EHF,OCA2,LMNTD1,ADRA1B,ADRA1D,CCND1,CCND3,BAK1,PTEN,NPY,TCF19,AR,HHIP,LGR5,LGR4,TNFSF11,RASGRP4,TNFSF14,ITGA2,TNFSF18,PDS5B,RC3H1,PRG4,EDNRA,APOA1,LILRB1,SOX11,MTCP1,PSMG1,TNFRSF4,REG3A,IFNW1,IL5RA,CMC4,HOXB4,PPARD,COL4A3,INSIG1,GRN,ZEB1,SLC39A5,ZE…
GO_NEGATIVE_REGULATION_OF_T_CELL_PROLIFERATION	SFTPD,FOXP3,IL20RB,ITCH,TGFB1,HLA-G,RC3H1,GLMN,TNFRSF14,IDO1,BTN2A2,KIAA0922,DLG1,CEBPB,PELI1,LILRB2,LILRB1,MAD1L1,PRNP,7-Mar,NDFIP1,SPN,C10orf54,PDE5A,ERBB2,FOXJ1,CDKN2A,HLA-DRB3,HLA-DRB1,HLA-DRB4,HLA-DRB5,TNFRSF21,XCL1,PRKAR1A,PLA2G2F,SHH,PDCD1LG2,PAWR,SCGB1A1,PTPN6,IL2RA,BMP4,CASP3,IL10,CD274,CD276,LGALS9,CLEC4G,IHH,GNRH1,HAVCR2,PLA2G2D,
GO_REGULATION_OF_OSTEOBLAST_PROLIFERATION	AGER,SMAD3,TMEM119,SOX8,GREM1,ABL1,PLXNB1,NPR3,CYR61,ATRAID,LTF,NELL1,RHOA,FGFR2,GATA1,HPSE,SFRP1,BMP2,LRP5,EIF2AK2,ITGAV,CTHRC1,BCL2,
GO_INSULIN_LIKE_GROWTH_FACTOR_RECEPTOR_BINDING	IGF2,IGF1,SOCS1,SHC1,GNAS,INSL4,SOCS2,IRS1,INSR,INS,YWHAH,REN,PIK3R1,ARRB1,YWHAG,
GO_REGULATION_OF_HEPATOCYTE_PROLIFERATION	WNT3A,PTN,IFNG,PLAU,CPB2,TNFAIP3,SULF2,LIMS2,GLI1,MED1,HPN,FBXW7,XBP1,
GO_POSITIVE_REGULATION_OF_ENDOTHELIAL_CELL_PROLIFERATION	CCL2,TNFSF12,CDH13,AGGF1,HMGB2,ITGB3,ECM1,BMP2,AKT1,CCR3,FLT4,RICTOR,CAV2,CAV1,RPTOR,PLXNB3,TEK,PROX1,GDF2,THBS4,JUN,STAT5A,NRP1,NF1,HTR2B,PDCD6,MYDGF,PPP1R16B,CCL24,KDR,WNT2,PGF,PDGFB,ACVRL1,PDCL3,ANG,PRKCA,NR4A1,SCG2,ZNF580,BMP4,MTOR,HIF1A,VEGFB,LRG1,CXCL12,TGFBR1,FGF2,NRP2,CCL11,BMP6,F3,VASH2,SEMA5A,ARNT,ARG1,NRARP,EGFL7,VIP,CYBA,BMPR2,EGR3,SIRT1,VEGFA,WNT5A,CCL26,PRKD1,PRKD2,
GO_POSITIVE_REGULATION_OF_NEUROBLAST_PROLIFERATION	SMO,DISC1,ZNF335,DMRTA2,CX3CR1,FZD3,SOX10,ASPM,DRD2,NOTCH1,HIF1A,CTNNB1,GLI3,PAX6,SMARCD3,OTP,VEGFC,SHH,VEGFA,DCT,CX3CL1,
GO_NEGATIVE_REGULATION_OF_SMOOTH_MUSCLE_CELL_PROLIFERATION	CDKN1B,ILK,IL12A,SF1,GPER1,TRIB1,NDRG2,NDRG4,ADIPOQ,CAV1,APOD,PPARGC1A,TPM1,KLF4,VIPR2,NPR1,NPR3,IFNG,PPARG,COMT,IL12B,IGFBP3,PPARD,IGFBP5,PTGIR,ANG,ESR2,ESR1,HMOX1,IL15,TNFAIP3,MFN2,VIP,OGN,CTNNBIP1,AIF1,
GO_CELLULAR_RESPONSE_TO_HEPATOCYTE_GROWTH_FACTOR_STIMULUS	SIRT2,IL10,CREB1,PLAU,GSK3B,IL6,VIL1,MED1,TDGF1,HGF,RELA,BCAR1,NRP1,
GO_INSULIN_LIKE_GROWTH_FACTOR_BINDING	INSR,ITGAV,HTRA4,IGF2R,HTRA1,HTRA3,WISP2,WISP3,WISP1,IGF1R,CYR61,IGFBPL1,IGFBP2,IGFBP3,IGFBP1,IGFBP6,IGFBP7,IGFBP4,IGFBP5,KAZALD1,IGFALS,CTGF,NOV,CRIM1,ESM1,
GO_NEGATIVE_REGULATION_OF_STEM_CELL_PROLIFERATION	PHF14,TGFB1,KCTD11,BMP4,NF1,VAX1,PTN,WNT5A,KDF1,NFIB,OVOL2,OVOL1,CTNNBIP1,SNAI2,FBLN1,CTNNA1,WNT11,
GO_REGULATION_OF_MAMMARY_GLAND_EPITHELIAL_CELL_PROLIFERATION	BRCA2,ETV4,PYGO2,CCND1,DEAF1,HOXA5,BAX,GPX1,ROBO1,PHB2,MED1,ZNF703,RREB1,GATA3,KDM5B,IQGAP3,
GO_REGULATION_OF_CELL_PROLIFERATION	ELANE,RNF10,HRSP12,FTMT,LIFR,PDCD10,ATPIF1,ADIPOQ,ZNF703,GPR183,PRNP,SPN,KDM2B,SIRPG,SP6,MEN1,PARP10,BAK1,CTBP1,CTBP2,TSG101,ITGA1,ITGA2,NOP2,DUSP22,AGT,LILRB2,LILRB1,TTK,CYP27B1,LIN28A,COL4A3,CNTFR,ZEB1,TACR1,RPS6KA2,KCNH1,HLX,TP53I11,NOG,ITGAV,TCIRG1,UTP20,NOV,GHRH,CD40LG,SESN1,GHRL,SMAD4,SMAD6,SMAD1,SMAD2,SMAD3,FOXM1,FKTN,PELI1,SPARC,PRKAR1A,SRPK2,BDKRB2,KIAA1524,ADARB1,CTHRC1,CDC42,AGGF1,SPHK…
GO_NEGATIVE_REGULATION_OF_LEUKOCYTE_PROLIFERATION	SFTPD,FOXP3,IL20RB,ITCH,CTLA4,CCL8,ATM,HLA-G,7-Mar,RC3H1,SHH,TNFRSF14,IDO1,BTN2A2,KIAA0922,DLG1,CEBPB,PELI1,LILRB2,LILRB1,MAD1L1,SOX11,PRNP,IHH,NDFIP1,GAL,SPN,C10orf54,LYN,PDE5A,TGFB1,FOXJ1,CDKN2A,GREM1,PKN1,HLA-DRB3,HLA-DRB1,HLA-DRB4,HLA-DRB5,MNDA,TNFRSF21,XCL1,PLA2G2D,PLA2G2F,GLMN,PDCD1LG2,PAWR,SCGB1A1,TNFRSF13B,PTPN6,IL2RA,BMP4,INPP5D,CASP3,LST1,CLEC4G,CD274,CD276,ERBB2,LGALS9,TNFAIP3,IL10,GST…
GO_FIBROBLAST_GROWTH_FACTOR_BINDING	FGFRL1,CEP57,RPS19,PTPRZ1,GLG1,RPS2,S100A13,FGFR4,THBS1,FGFBP3,FGFBP1,HSPA9,TGFBR3,KLB,GPC1,CXCL13,FGFR2,FGFR3,FGFR1,API5,FIBP,KL,SCN5A,
GO_PLATELET_DERIVED_GROWTH_FACTOR_RECEPTOR_SIGNALING_PATHWAY	PDGFRB,PDGFRA,SRC,MYO1E,PDGFRL,ABL1,ZFAND5,RAPGEF1,TXNIP,IQGAP1,BCR,SGPL1,CSRNP1,JAK2,PDGFA,PDGFB,PDGFC,PDGFD,CLASP2,PLAT,PIK3C2A,FER,PTPN1,GAB1,BCAR1,NRP1,RGS14,VEGFA,ARID5B,PTPN11,PTEN,PLEKHA1,TIPARP,PTPRJ,
GO_POSITIVE_REGULATION_OF_CARDIAC_MUSCLE_CELL_PROLIFERATION	MEF2C,CCNB1,ERBB4,CDK1,FGFR2,RBPJ,NOTCH1,TBX2,MAPK14,GATA6,BMP10,TBX20,FGF9,TBX5,NRG1,FGFR1,HEY2,FGF2,WNT2,
GO_FIBROBLAST_GROWTH_FACTOR_RECEPTOR_SIGNALING_PATHWAY	FGF1,FGFRL1,POLR2I,NCBP1,TRIM71,FGF5,CEP57,FGFR1,RPS27A,SPRED1,FRS3,FRS2,FGF9,FGF7,HNRNPH1,FGF6,TIA1,IQGAP1,NCBP2,FGF2,MAPK3,NDST1,CTGF,FGF8,FGFR3,FGFR2,ESRP2,ESRP1,MAPK1,ANOS1,FGFBP1,FGF18,PTBP1,POLR2J,SETX,RAB14,HNRNPF,HNRNPM,KIF16B,RBFOX2,UBB,KLB,SHCBP1,UBA52,HNRNPA1,FGF12,POLR2E,POLR2D,FLRT3,POLR2F,POLR2A,SPRED2,POLR2C,POLR2B,POLR2G,POLR2L,FGFR4,FGF4,FGF3,POLR2H,POLR2K,GALNT3,FLRT1,FLRT2,FGF1…
GO_REGULATION_OF_STEM_CELL_PROLIFERATION	N4BP2L2,FBLN1,DGCR8,ACE,SIX1,SIX3,FOXF1,MYC,SHOX2,SMARCD3,SNAI2,KITLG,FGFR2,FGFR1,KCTD11,BMP4,CX3CR1,WNT2,PRRX1,FOXP2,HIF1A,DPPA2,SOX18,PTN,LRRK2,SOX10,SOX11,SOX17,DISC1,NF2,NF1,CX3CL1,SIRT6,PAX6,VEGFA,VEGFC,SHH,ZEB1,WNT5A,AGO3,KDM1A,ZNF335,FGF9,VAX1,SMO,TBX3,TBX1,TP63,FZD3,ATXN1L,STAT1,ASPM,FBXW4,TGFBR2,HMGA2,DCT,YAP1,LRP5,PDCD2,EIF2AK2,IRS2,CHRD,PHF14,TGFB1,HMGB2,KDF1,CTNNB1,BMPR1A,SOX9,OVOL2,O…
GO_NEGATIVE_REGULATION_OF_CELLULAR_RESPONSE_TO_TRANSFORMING_GROWTH_FACTOR_BETA_STIMULUS	TGFB1,TGFB3,SNX6,HSPA5,TGFBR2,ONECUT2,SMAD6,SMAD7,DAND5,SMAD2,SMAD3,GLG1,LDLRAD4,DNM2,HTRA4,BCL9L,PIN1,NKX2-1,CAV2,HTRA1,PEG10,HTRA3,ADAMTSL2,ZNF451,SMURF2,PBLD,PPM1A,STUB1,SKI,ASPN,STRAP,ADAM17,TGFB1I1,CAV1,ONECUT1,SNX25,TGFBR3,PRDM16,TGFBR1,RPS27A,VASN,RASL11B,LTBP1,ENG,LEMD3,FBN2,PMEPA1,FBN1,BAMBI,SKIL,CIDEA,CHST11,MTMR4,WNT1,SMURF1,MECOM,UBA52,EID2,UBB,UBC,SIRT1,PDPK1,FAM89B,SKOR2,CD109,SKOR1,
GO_POSITIVE_REGULATION_OF_TRANSFORMING_GROWTH_FACTOR_BETA_RECEPTOR_SIGNALING_PATHWAY	ITGA8,TGFBR3,SMAD4,STK11,MEN1,SDCBP,HIPK2,MYOCD,ADAM17,DAB2,FURIN,THBS1,CDKN1C,RNF111,CITED2,CITED1,CDKN2B,FLCN,TGFB1I1,GIPC1,LRG1,ING2,SNW1,NPNT,
GO_RESPONSE_TO_PLATELET_DERIVED_GROWTH_FACTOR	CCL2,PDGFRB,CCNA2,FN1,ERRFI1,FYN,HYAL1,DNMT1,CREB1,SRC,IQGAP1,CORO1B,FER,YES1,PTN,PDGFD,HAS1,HAS2,
GO_NEGATIVE_REGULATION_OF_ENDOTHELIAL_CELL_PROLIFERATION	GHRL,SCG2,AIMP1,TNMD,APOH,PDCD10,ATPIF1,CAV2,CAV1,APOE,STAT1,GDF2,ATP5A1,SYNJ2BP,SULF1,XDH,CXCR3,SPARC,NF1,ATOH8,TGFBR1,ACVRL1,ENG,AGER,NR2F2,DLL4,KRIT1,GJA1,VASH1,RGCC,PTPRM,THBS1,
GO_LYMPHANGIOGENESIS	SOX18,ACVR2B,ACVRL1,PROX1,CCBE1,PDPN,PTPN14,FOXC2,BMPR2,PPP3CB,FLT4,
GO_CELL_MIGRATION_INVOLVED_IN_SPROUTING_ANGIOGENESIS	EFNB2,ITGB1,GREM1,SRF,EPHB4,ROBO1,EGR3,NR4A1,FGF2,GPLD1,VEGFA,SLIT2,NRP1,KDR,TDGF1,
GO_RESPONSE_TO_HEPATOCYTE_GROWTH_FACTOR	SIRT2,IL10,PLAU,CREB1,GSK3B,IL6,VIL1,MED1,TDGF1,HGF,RELA,BCAR1,NRP1,
GO_PLATELET_DERIVED_GROWTH_FACTOR_RECEPTOR_BINDING	FIGF,PDGFRB,ITGB3,PDGFC,PDGFD,PDGFA,PDGFRA,PDGFB,ITGA5,PTEN,TYMP,VEGFA,LYN,PTPRJ,IL1R1,
GO_REGULATION_OF_EPIDERMAL_GROWTH_FACTOR_ACTIVATED_RECEPTOR_ACTIVITY	ERRFI1,EPGN,SNX6,ADORA1,ADAM17,GPRC5A,EGF,TGFA,PSEN1,ADRA2A,ADRA2B,ADRA2C,NEURL1,FBXW7,CBLC,SHC1,SOCS5,SOCS4,NCK2,APP,ZFYVE28,ZGPAT,EREG,
