# Supplementary material for: Typing tumors using pathways selected by somatic evolution
Source: Nat Commun. 2018 Oct 8;9:4159. doi: 10.1038/s41467-018-06464-y (PMC6175900; doi:10.1038/s41467-018-06464-y)
Supplement: Supplementary file 7 — Supplementary Data 4 [file 41467_2018_6464_MOESM7_ESM.xlsx]

## Sheet: summary
Cancer type (Purple denotes NBS-ESP can recapture known cancer subtypes, green denotes NBS-ESP is not overlapped with known subtypes but can predict survival well)	# of subtypes of NBS-ESP	# of known cancer subtypes	Association with known cancer subtypes P-value is calculated by chi-square test	Overlap with each known cancer subtypes (For each known cancer subtype, we calculated its maximum Jaccard similarity with the NBS-ESP subtypes. Red represents known cancer subtypes. Orange denotes NBS-ESP subtype.	Signifcant associated clinical measurements P-value is calculated by one-sided fisher exact test and Bonferroni correction. Blue represents clinical variables.	Additional predicting power for survival measured by P-value
BRCA	6	5	8.61e-27	Basal: Jaccard Similarity=0.295 with subtype 1	HISTOLOGICAL_DIAGNOSIS=Infiltrating Ductal Carcinoma P-value = 5.945431e-06	0.92709
				Her2: Jaccard Similarity=0.108 with subtype 5	HISTOLOGICAL_DIAGNOSIS=Mucinous Carcinoma P-value = 0.003632869
				LumA: Jaccard Similarity=0.251 with subtype 2	ER_STATUS_BY_IHC=Negative P-value = 3.348488e-21
				LumB: Jaccard Similarity=0.179 with subtype 2	ER_STATUS_BY_IHC=Positive P-value = 4.852852e-10
				Normal: Jaccard Similarity=0.033 with subtype 1
GBM	2	5	0.002291	Classical: Jaccard Similarity=0.267 with subtype 2		0.00284
				G-CIMP: Jaccard Similarity=0.100 with subtype 1
				Mesenchymal: Jaccard Similarity=0.241 with subtype 1
				Neural: Jaccard Similarity=0.168 with subtype 2
				Proneural: Jaccard Similarity=0.208 with subtype 1
HNSC	3	3	0.821	Squamous Cell Carcinoma: Jaccard Similarity=0.570 with subtype 2	NEW_TUMOR_EVENT_AFTER_INITIAL_TREATMENT=YES P-value = 0.0009290347	0.00326
				SCC Basaloid Type: Jaccard Similarity=0.013 with subtype 1	NEW_TUMOR_EVENT_AFTER_INITIAL_TREATMENT=NO P-value = 0.01722072
				SCC Spindle Cell Variant: Jaccard Similarity=0.004 with subtype 2
KIPAN	5	No known cancer subtype	NaN		LATERALITY=Left P-value = 0.03090614	0.76943
					AJCC_CLINICAL_TUMOR_STAGE=Stage II P-value = 0.02919619
LIHC	6	3	0.0289	Hepatocholangiocarcinoma Mixed: Jaccard Similarity=0.067 with subtype 2	RACE=WHITE P-value = 0.01961945	0.03286
				Hepatocellular Carcinoma: Jaccard Similarity=0.225 with subtype 1	BILIRUBIN_TOTAL_NORM_RANGE_LOWER=Low P-value = 0.0439024
				Fibrolamellar Carcinoma: Jaccard Similarity=0.069 with subtype 2	PLATELET_NORM_RANGE_UPPER=450 P-value = 0.04743337
					GRADE=G1 P-value = 0.04728184
					AFP_NORM_RANGE_UPPER=High P-value = 0.003400033
LUAD	4	No known cancer subtype	NaN		TARGETED_MOLECULAR_THERAPY=YES P-value = 0.00342434	3e-05
					RACE=BLACK OR AFRICAN AMERICAN P-value = 0.04348076
					TOBACCO_SMOKING_HISTORY_INDICATOR=Current Refomed Smoker for < or = 15 yrs: P-value = 7.304955e-05
					TOBACCO_SMOKING_HISTORY_INDICATOR=Lifelong Non-Smoker P-value = 1.946083e-07
LUSC	2	No known cancer subtype	NaN			0.24799
UCEC	3	3	4.556e-15	High Grade Endometrioid: Jaccard Similarity=0.330 with subtype 1	RACE=BLACK OR AFRICAN AMERICAN P-value = 0.03711615	0.14495
				High Grade Serous or Mixed: Jaccard Similarity=0.377 with subtype 3	HISTOLOGICAL_DIAGNOSIS=Serous endometrial adenocarcinoma P-value = 1.317102e-09
				Low Grade Endometrioid: Jaccard Similarity=0.433 with subtype 2	GRADE=G3 P-value = 0.007900714
					HISTOLOGICAL_DIAGNOSIS=Endometrioid endometrial adenocarcinoma P-value = 4.444277e-06
THCA	3	4	0.007342	Classical/usual: Jaccard Similarity=0.498 with subtype 2	EXTRATHYROIDAL_EXTENSION=Moderate/Advanced T4a P-value = 0.009347075	0.05112
				Follicular >= 99% follicular patterned: Jaccard Similarity=0.269 with subtype 2	HISTOLOGICAL_DIAGNOSIS=Thyroid Papillary Carcinoma - Tall Cell >= 50% tall cell features P-value = 0.04045319
				Other specify: Jaccard Similarity=0.013 with subtype 2	EXTRATHYROIDAL_EXTENSION: None P-value = 0.01584725
				Tall Cell >= 50% tall cell features: Jaccard Similarity=0.155 with subtype 3
OV	2	4	0.3587	Differentiated: Jaccard Similarity=0.266 with subtype 1		0.0016
				Immunoreactive: Jaccard Similarity=0.219 with subtype 1
				Mesenchymal: Jaccard Similarity=0.188 with subtype 2
				Proliferative: Jaccard Similarity=0.215 with subtype 1
PAAD	4	14	0.6158	82463 Neuroendocrine Carcinoma NOS: Jaccard Similarity=0.000		0.05964
				Invasive well-differentiated: Jaccard Similarity=0.250 with subtype 4
				Not specified: Jaccard Similarity=0.000
				Neuroendocrine: Jaccard Similarity=0.000
				Poorly differentiated pancreatic adenocarcinoma: Jaccard Similarity=0.250 with subtype 3
				Neuroendocrine Carcinoma: Jaccard Similarity=0.000
				Neuroendocrine Carcinoma NOS: Jaccard Similarity=0.000
				Adenocarcinoma- NOS: Jaccard Similarity=0.250 with subtype 4
				Adenocarcinoma NOS: Jaccard Similarity=0.429 with subtype 3
				Invasive adenocarcinoma: Jaccard Similarity=0.333 with subtype 2
				Ductal and micropapillary: Jaccard Similarity=0.333 with subtype 2
				Intraductal tubulopapillary neoplasm: Jaccard Similarity=0.000
				Poorly differentiated adenocarcinoma: Jaccard Similarity=0.000
				Moderately differentiated ductal adenocarcinoma 60% + neuroendocrine 40%: Jaccard Similarity=0.250 with subtype 4
PRAD	2	14	0.3505	Mixed ductal and acinar: Jaccard Similarity=0.250 with subtype 2		0.07135
				Mixed ductal 65% and Acinar: Jaccard Similarity=0.167 with subtype 1
				Ductal: Jaccard Similarity=0.000
				Adenocarcinoma with focal mucinous features: Jaccard Similarity=0.250 with subtype 2
				Acinar and cribriform: Jaccard Similarity=0.167 with subtype 1
				Mixed: Jaccard Similarity=0.000
				Prostatic Adenocarcinoma Acinar Type Mixed with Prostatic Duct Adenocarcinoma: Jaccard Similarity=0.250 with subtype 2
				Acinar and ductal: Jaccard Similarity=0.000
				Mixed acinar & ductal: Jaccard Similarity=0.167 with subtype 1
				Adenocarcinoma prostate with prominent ductal differentiation identified: Jaccard Similarity=0.250 with subtype 2
				Mixed: Jaccard Similarity=0.167 with subtype 1
				Mixed ductal and acinar type: Jaccard Similarity=0.167 with subtype 1
				25-30% ductal component: Jaccard Similarity=0.167 with subtype 1
				Prostate Adenocarcinoma Not Otherwised Specified with ductal featues: Jaccard Similarity=0.000
COADREAD	2	4	1.031e-10	Rectal Adenocarcinoma: Jaccard Similarity=0.296 with subtype 2	BRAF_GENE_ANALYSIS_INDICATOR=YES: P-value = 1.012748e-05	0.91293
				Colon Adenocarcinoma: Jaccard Similarity=0.441 with subtype 1	LYMPHOVASCULAR_INVASION_INDICATOR=NO: P-value = 0.0002901288
				Colon Mucinous Adenocarcinoma: Jaccard Similarity=0.142 with subtype 1	HISTOLOGICAL_DIAGNOSIS=Colon Adenocarcinoma: P-value = 0.0009583649
				Rectal Mucinous Adenocarcinoma: Jaccard Similarity=0.039 with subtype 2	PRIMARY_SITE=Cecum: P-value = 0.0002995465
					BRAF_GENE_ANALYSIS_INDICATOR=NO P-value = 1.012748e-05
					LYMPHOVASCULAR_INVASION_INDICATOR=YES P-value = 0.0002901288
					HISTOLOGICAL_DIAGNOSIS=Rectal Adenocarcinoma P-value = 2.717092e-08
					PRIMARY_SITE=Rectum P-value = 1.171417e-10
SARC	2	3	0.9941	Conventional leiomyosarcoma: Jaccard Similarity=0.534 with subtype 2		0.00179
				Well-differentiated leiomyosarcoma resembling leiomyoma: Jaccard Similarity=0.040 with subtype 1
				Poorly differentiated or pleomorphic or epithelioid leiomyosarcoma: Jaccard Similarity=0.296 with subtype 2
STAD	2	6	0.9749	Diffuse Type: Jaccard Similarity=0.150 with subtype 2	BARRETTS_ESOPHAGUS=Yes P-value = 0.006269197	0.50364
				Intestinal Adenocarcinoma Tubular Type: Jaccard Similarity=0.139 with subtype 1
				Intestinal Adenocarcinoma Papillary Type: Jaccard Similarity=0.021 with subtype 2
				Intestinal Adenocarcinoma Mucinous Type: Jaccard Similarity=0.055 with subtype 2
				Adenocarcinoma Signet Ring Type: Jaccard Similarity=0.014 with subtype 1
				Adenocarcinoma NOS: Jaccard Similarity=0.322 with subtype 2
				Intestinal Adenocarcinoma NOS: Jaccard Similarity=0.128 with subtype 2
TGCT	2	No known cancer subtype	NaN			0.21897
BLCA	2	2	0.6298	Papillary: Jaccard Similarity=0.247 with subtype 1	GRADE=Low Grade P-value = 0.02629964	0.0008
				Non-Papillary: Jaccard Similarity=0.437 with subtype 2	GRADE=High Grade P-value = 0.02629964
CESC	6	6	0.03773	Cervical Squamous Cell Carcinoma: Jaccard Similarity=0.331 with subtype 2		0.00087
				Endocervical Type of Adenocarcinoma: Jaccard Similarity=0.135 with subtype 4
				Endocervical Adenocarcinoma of the Usual Type: Jaccard Similarity=0.075 with subtype 4
				Adenosquamous: Jaccard Similarity=0.067 with subtype 6
				Endometrioid Adenocarcinoma of Endocervix: Jaccard Similarity=0.083 with subtype 1
				Mucinous Adenocarcinoma of Endocervical Type: Jaccard Similarity=0.065 with subtype 6
